# Supplementary material for: Integration of RNA-Seq and proteomics data identifies glioblastoma multiforme surfaceome signature
Source: BMC Cancer. 2021 Jul 23;21:850. doi: 10.1186/s12885-021-08591-0 (PMC8306276; doi:10.1186/s12885-021-08591-0)
Supplement: Supplementary file 1 — Additional file 1: Supplementary Table S1. Overall differentially expressed genes in TCGA GBM tissues vs. GTEx normal brain tissues. Supplementary Table S2. Significantly dysregulated cell surface genes in TCGA GBM tissues vs. GTEx normal brain tissues. Supplementary Table S3. GBM cell lines proteomics data from Bausch-Fluck et al. 2015. Supplementary Table S4. GBM tissue samples proteomics data from Polisetty et al. 2012. Supplementary Table S5. Protein-protein interaction network analysis of surfaceome. [file 12885_2021_8591_MOESM1_ESM.xlsx]

## Sheet: Table S1
Table S1: Overall differentially expressed genes in TCGA GBM tissues vs. GTEx normal brain tissues
EntrezID	Gene name	Symbols	log2 fold change	P-value	Adj. P-value
1	alpha-1-B glycoprotein	A1BG	3.3713	1.3e-216	7.05e-215
2	alpha-2-macroglobulin	A2M	-1.7597	6.34e-92	2.83e-91
144568	alpha-2-macroglobulin-like 1	A2ML1	0.34191	0.0026107	0.0029374
53947	alpha 1,4-galactosyltransferase	A4GALT	0.58574	2.76e-12	3.71e-12
8086	achalasia, adrenocortical insufficiency, alacrimia	AAAS	-0.31623	5.63e-20	8.51e-20
65985	acetoacetyl-CoA synthetase	AACS	1.7311	2e-126	1.76e-125
51166	aminoadipate aminotransferase	AADAT	0.40622	3.88e-27	6.51e-27
79719	alpha- and gamma-adaptin binding protein	AAGAB	0.50143	2.18e-37	4.2e-37
22848	AP2 associated kinase 1	AAK1	1.2489	8.98e-60	2.4e-59
10157	aminoadipate-semialdehyde synthase	AASS	-1.1944	1.72e-49	4e-49
9625	apoptosis-associated tyrosine kinase	AATK	1.9641	1.66e-88	6.98e-88
18	4-aminobutyrate aminotransferase	ABAT	0.23263	9.45e-05	0.0001104
19	ATP-binding cassette, sub-family A (ABC1), member 1	ABCA1	-2.5071	2.42e-134	2.56e-133
10349	ATP-binding cassette, sub-family A (ABC1), member 10	ABCA10	3.56	1.49e-203	6.93e-202
26154	ATP-binding cassette, sub-family A (ABC1), member 12	ABCA12	-0.28161	0.00045649	0.00052491
154664	ATP-binding cassette, sub-family A (ABC1), member 13	ABCA13	-2.8411	8.11e-54	2e-53
20	ATP-binding cassette, sub-family A (ABC1), member 2	ABCA2	1.0811	1.41e-45	3.08e-45
24	ATP-binding cassette, sub-family A (ABC1), member 4	ABCA4	1.444	8.62e-50	2.01e-49
23461	ATP-binding cassette, sub-family A (ABC1), member 5	ABCA5	2.7406	6.98e-151	1.1e-149
23460	ATP-binding cassette, sub-family A (ABC1), member 6	ABCA6	0.3012	0.0021197	0.0023907
10347	ATP-binding cassette, sub-family A (ABC1), member 7	ABCA7	1.9225	1.25e-110	7.98e-110
10351	ATP-binding cassette, sub-family A (ABC1), member 8	ABCA8	-0.43305	4.59e-05	5.41e-05
10350	ATP-binding cassette, sub-family A (ABC1), member 9	ABCA9	2.6898	5.14e-171	1.32e-169
5243	ATP-binding cassette, sub-family B (MDR/TAP), member 1	ABCB1	0.35454	5.32e-07	6.53e-07
8647	ATP-binding cassette, sub-family B (MDR/TAP), member 11	ABCB11	0.38026	0.012939	0.014244
5244	ATP-binding cassette, sub-family B (MDR/TAP), member 4	ABCB4	-1.802	1.99e-84	7.82e-84
10058	ATP-binding cassette, sub-family B (MDR/TAP), member 6	ABCB6	-1.2427	1.26e-112	8.38e-112
22	ATP-binding cassette, sub-family B (MDR/TAP), member 7	ABCB7	-1.0049	1.89e-124	1.61e-123
11194	ATP-binding cassette, sub-family B (MDR/TAP), member 8	ABCB8	0.30472	3.73e-17	5.42e-17
23457	ATP-binding cassette, sub-family B (MDR/TAP), member 9	ABCB9	2.0017	1.65e-177	4.82e-176
4363	ATP-binding cassette, sub-family C (CFTR/MRP), member 1	ABCC1	-0.60481	2.73e-36	5.21e-36
89845	ATP-binding cassette, sub-family C (CFTR/MRP), member 10	ABCC10	0.48864	6.55e-34	1.21e-33
85320	ATP-binding cassette, sub-family C (CFTR/MRP), member 11	ABCC11	0.1946	0.023808	0.025993
94160	ATP-binding cassette, sub-family C (CFTR/MRP), member 12	ABCC12	4.9361	4.68e-152	7.59e-151
8714	ATP-binding cassette, sub-family C (CFTR/MRP), member 3	ABCC3	-1.2584	1.26e-14	1.76e-14
10257	ATP-binding cassette, sub-family C (CFTR/MRP), member 4	ABCC4	-1.9174	1.55e-118	1.16e-117
10057	ATP-binding cassette, sub-family C (CFTR/MRP), member 5	ABCC5	1.4222	4.68e-113	3.13e-112
368	ATP-binding cassette, sub-family C (CFTR/MRP), member 6	ABCC6	-0.75896	1.5e-26	2.5e-26
6833	ATP-binding cassette, sub-family C (CFTR/MRP), member 8	ABCC8	2.421	1.34e-70	4.25e-70
10060	ATP-binding cassette, sub-family C (CFTR/MRP), member 9	ABCC9	0.44895	6.42e-07	7.86e-07
215	ATP-binding cassette, sub-family D (ALD), member 1	ABCD1	-1.1139	2.78e-78	9.92e-78
225	ATP-binding cassette, sub-family D (ALD), member 2	ABCD2	1.0714	1.77e-31	3.16e-31
5825	ATP-binding cassette, sub-family D (ALD), member 3	ABCD3	-0.79182	1.41e-66	4.18e-66
5826	ATP-binding cassette, sub-family D (ALD), member 4	ABCD4	-0.60886	3.58e-47	8.03e-47
6059	ATP-binding cassette, sub-family E (OABP), member 1	ABCE1	-0.82842	2.16e-106	1.27e-105
23	ATP-binding cassette, sub-family F (GCN20), member 1	ABCF1	-0.79742	3.28e-104	1.85e-103
55324	ATP-binding cassette, sub-family F (GCN20), member 3	ABCF3	-0.066585	0.028968	0.031543
9619	ATP-binding cassette, sub-family G (WHITE), member 1	ABCG1	-1.4545	2.19e-103	1.21e-102
9429	ATP-binding cassette, sub-family G (WHITE), member 2	ABCG2	-0.3438	1.89e-05	2.25e-05
64137	ATP-binding cassette, sub-family G (WHITE), member 4	ABCG4	3.8671	9.84e-174	2.63e-172
64240	ATP-binding cassette, sub-family G (WHITE), member 5	ABCG5	1.7128	7.58e-94	3.51e-93
64241	ATP-binding cassette, sub-family G (WHITE), member 8	ABCG8	4.4209	3.22e-167	7.52e-166
84696	abhydrolase domain containing 1	ABHD1	0.28182	4.79e-05	5.64e-05
83451	abhydrolase domain containing 11	ABHD11	0.35368	3.03e-16	4.34e-16
26090	abhydrolase domain containing 12	ABHD12	0.56848	1.94e-66	5.72e-66
145447	abhydrolase domain containing 12B	ABHD12B	2.6826	4.13e-154	7.04e-153
84945	abhydrolase domain containing 13	ABHD13	-0.072963	0.034943	0.037933
25864	abhydrolase domain containing 14A	ABHD14A	1.199	1.91e-104	1.08e-103
84836	abhydrolase domain containing 14B	ABHD14B	-0.43671	2.14e-22	3.35e-22
116236	abhydrolase domain containing 15	ABHD15	-0.89793	9.75e-50	2.27e-49
7920	abhydrolase domain containing 16A	ABHD16A	2.881	0	0
140701	abhydrolase domain containing 16B	ABHD16B	9.2747	0	0
11057	abhydrolase domain containing 2	ABHD2	-0.55836	3.01e-25	4.9e-25
171586	abhydrolase domain containing 3	ABHD3	-0.35998	2.01e-09	2.58e-09
63874	abhydrolase domain containing 4	ABHD4	-1.6995	2.58e-98	1.3e-97
51099	abhydrolase domain containing 5	ABHD5	-1.2511	1.69e-102	9.18e-102
57406	abhydrolase domain containing 6	ABHD6	-0.32269	7.11e-12	9.53e-12
79575	abhydrolase domain containing 8	ABHD8	2.2738	7.16e-174	1.92e-172
51225	ABI family, member 3	ABI3	-2.4241	3.55e-93	1.62e-92
25890	ABI family, member 3 (NESH) binding protein	ABI3BP	-2.4777	1.6e-85	6.41e-85
25	c-abl oncogene 1, non-receptor tyrosine kinase	ABL1	-0.89535	2.19e-82	8.31e-82
3983	actin binding LIM protein 1	ABLIM1	0.40184	9.53e-13	1.29e-12
84448	actin binding LIM protein family, member 2	ABLIM2	3.0653	4.08e-174	1.11e-172
22885	actin binding LIM protein family, member 3	ABLIM3	0.51057	1.31e-14	1.83e-14
28	ABO blood group (transferase A, alpha 1-3-N-acetylgalactosaminyltransferase; transferase B, alpha 1-3-galactosyltransferase)	ABO	-0.75467	1.14e-16	1.64e-16
26	amiloride binding protein 1 (amine oxidase (copper-containing))	ABP1	-1.3979	4.65e-25	7.55e-25
29	active BCR-related	ABR	1.3015	2.4e-124	2.03e-123
137735	actin-binding Rho activating protein	ABRA	3.6628	1.97e-127	1.78e-126
80325	ankyrin repeat and BTB (POZ) domain containing 1	ABTB1	2.1237	1.26e-165	2.84e-164
25841	ankyrin repeat and BTB (POZ) domain containing 2	ABTB2	-0.27531	3.25e-05	3.84e-05
10449	acetyl-CoA acyltransferase 2	ACAA2	1.1151	2.4e-41	4.92e-41
32	acetyl-CoA carboxylase beta	ACACB	1.6055	1.71e-70	5.41e-70
84129	acyl-CoA dehydrogenase family, member 11	ACAD11	-6.1967	5.26e-302	6.99e-300
33	acyl-CoA dehydrogenase, long chain	ACADL	1.9452	6.41e-59	1.69e-58
35	acyl-CoA dehydrogenase, C-2 to C-3 short chain	ACADS	0.81844	5.05e-30	8.8e-30
36	acyl-CoA dehydrogenase, short/branched chain	ACADSB	0.75388	4.06e-49	9.36e-49
37	acyl-CoA dehydrogenase, very long chain	ACADVL	0.50199	1e-30	1.76e-30
176	aggrecan	ACAN	-0.5252	2.04e-05	2.43e-05
9744	ArfGAP with coiled-coil, ankyrin repeat and PH domains 1	ACAP1	-1.0233	9.27e-49	2.12e-48
23527	ArfGAP with coiled-coil, ankyrin repeat and PH domains 2	ACAP2	-0.5184	9.13e-38	1.77e-37
116983	ArfGAP with coiled-coil, ankyrin repeat and PH domains 3	ACAP3	1.0903	4.74e-59	1.25e-58
39	acetyl-CoA acetyltransferase 2	ACAT2	-0.29737	7.28e-08	9.09e-08
64746	acyl-CoA binding domain containing 3	ACBD3	-0.63212	2.78e-71	8.9e-71
79777	acyl-CoA binding domain containing 4	ACBD4	0.77889	4.28e-64	1.22e-63
91452	acyl-CoA binding domain containing 5	ACBD5	-0.099167	0.027137	0.029568
414149	acyl-CoA binding domain containing 7	ACBD7	2.0123	1.6e-54	3.97e-54
84680	1-aminocyclopropane-1-carboxylate synthase homolog (Arabidopsis)(non-functional)	ACCS	0.26541	0.0017371	0.0019661
65057	adrenocortical dysplasia homolog (mouse)	ACD	0.17201	3.1e-06	3.75e-06
1636	angiotensin I converting enzyme (peptidyl-dipeptidase A) 1	ACE	0.37171	8.99e-06	1.08e-05
59272	angiotensin I converting enzyme (peptidyl-dipeptidase A) 2	ACE2	-0.24212	0.037368	0.04051
125981	alkaline ceramidase 1	ACER1	0.99949	5.06e-15	7.13e-15
340485	alkaline ceramidase 2	ACER2	1.289	4.53e-45	9.8e-45
55331	alkaline ceramidase 3	ACER3	-0.57137	5.01e-55	1.25e-54
43	acetylcholinesterase	ACHE	1.3514	6.07e-62	1.67e-61
47	ATP citrate lyase	ACLY	-1.014	2.89e-108	1.76e-107
130013	aminocarboxymuconate semialdehyde decarboxylase	ACMSD	-2.5821	4.76e-92	2.13e-91
48	aconitase 1, soluble	ACO1	-0.28378	3.1e-14	4.3e-14
50	aconitase 2, mitochondrial	ACO2	0.63695	1.29e-42	2.68e-42
641371	acyl-CoA thioesterase 1	ACOT1	0.99649	1.81e-29	3.14e-29
26027	acyl-CoA thioesterase 11	ACOT11	1.3138	1.82e-49	4.21e-49
134526	acyl-CoA thioesterase 12	ACOT12	0.69055	1.87e-06	2.27e-06
10965	acyl-CoA thioesterase 2	ACOT2	0.3883	3.26e-14	4.53e-14
122970	acyl-CoA thioesterase 4	ACOT4	2.5171	3.94e-156	7.03e-155
641372	acyl-CoA thioesterase 6	ACOT6	1.1719	1.2e-17	1.76e-17
11332	acyl-CoA thioesterase 7	ACOT7	1.7247	2.44e-96	1.18e-95
10005	acyl-CoA thioesterase 8	ACOT8	0.23638	6.03e-13	8.21e-13
51	acyl-CoA oxidase 1, palmitoyl	ACOX1	-0.61066	3.35e-52	8.1e-52
8309	acyl-CoA oxidase 2, branched chain	ACOX2	-0.23797	0.0048157	0.0053791
8310	acyl-CoA oxidase 3, pristanoyl	ACOX3	-0.63493	2.28e-82	8.64e-82
55289	acyl-CoA oxidase-like	ACOXL	-0.34246	0.00027536	0.00031822
52	acid phosphatase 1, soluble	ACP1	0.32798	7.05e-26	1.16e-25
53	acid phosphatase 2, lysosomal	ACP2	-0.41588	1.63e-28	2.78e-28
54	acid phosphatase 5, tartrate resistant	ACP5	-2.0843	1.38e-52	3.35e-52
51205	acid phosphatase 6, lysophosphatidic	ACP6	-0.13493	0.01667	0.018286
55	acid phosphatase, prostate	ACPP	-1.1205	2.75e-12	3.7e-12
49	acrosin	ACR	1.2798	1e-55	2.54e-55
84519	acrosin binding protein	ACRBP	-1.2266	2.58e-60	6.93e-60
56	acrosomal vesicle protein 1	ACRV1	1.3525	1.88e-56	4.8e-56
23205	acyl-CoA synthetase bubblegum family member 1	ACSBG1	0.98471	3.12e-22	4.87e-22
81616	acyl-CoA synthetase bubblegum family member 2	ACSBG2	-0.70827	8.05e-11	1.06e-10
2181	acyl-CoA synthetase long-chain family member 3	ACSL3	0.29348	2.5e-11	3.32e-11
2182	acyl-CoA synthetase long-chain family member 4	ACSL4	0.3254	3.02e-09	3.86e-09
51703	acyl-CoA synthetase long-chain family member 5	ACSL5	0.52501	1.26e-08	1.59e-08
23305	acyl-CoA synthetase long-chain family member 6	ACSL6	1.4454	8.41e-50	1.96e-49
116285	acyl-CoA synthetase medium-chain family member 1	ACSM1	1.5715	1.21e-46	2.69e-46
6296	acyl-CoA synthetase medium-chain family member 3	ACSM3	-1.4778	1.58e-54	3.92e-54
54988	acyl-CoA synthetase medium-chain family member 5	ACSM5	-1.0122	5.18e-23	8.18e-23
84532	acyl-CoA synthetase short-chain family member 1	ACSS1	0.83976	3.02e-24	4.86e-24
79611	acyl-CoA synthetase short-chain family member 3	ACSS3	0.81675	2.07e-15	2.93e-15
58	actin, alpha 1, skeletal muscle	ACTA1	3.5318	1.09e-154	1.87e-153
59	actin, alpha 2, smooth muscle, aorta	ACTA2	-0.85877	1.26e-13	1.74e-13
60	actin, beta	ACTB	-1.034	1.12e-119	8.5e-119
70	actin, alpha, cardiac muscle 1	ACTC1	2.4676	4.69e-71	1.5e-70
71	actin, gamma 1	ACTG1	-0.88439	2.48e-103	1.37e-102
72	actin, gamma 2, smooth muscle, enteric	ACTG2	1.3526	2.1e-16	3.02e-16
170487	actin-like 10	ACTL10	0.36405	2.95e-05	3.49e-05
86	actin-like 6A	ACTL6A	-2.1274	6.18e-152	9.99e-151
51412	actin-like 6B	ACTL6B	2.2328	1.25e-52	3.03e-52
81569	actin-like 8	ACTL8	0.94656	1.13e-09	1.46e-09
87	actinin, alpha 1	ACTN1	0.36871	1.09e-05	1.31e-05
88	actinin, alpha 2	ACTN2	1.2292	1.13e-63	3.19e-63
89	actinin, alpha 3	ACTN3	1.0024	1.58e-25	2.59e-25
81	actinin, alpha 4	ACTN4	-0.11875	0.0043081	0.0048168
55860	actin-related protein 10 homolog (S. cerevisiae)	ACTR10	0.4111	8.71e-31	1.53e-30
10120	ARP1 actin-related protein 1 homolog B, centractin beta (yeast)	ACTR1B	0.99901	2.68e-96	1.3e-95
10097	ARP2 actin-related protein 2 homolog (yeast)	ACTR2	0.12303	0.0014592	0.0016558
10096	ARP3 actin-related protein 3 homolog (yeast)	ACTR3	-0.52857	1.7e-49	3.94e-49
57180	ARP3 actin-related protein 3 homolog B (yeast)	ACTR3B	1.6018	7.99e-118	5.85e-117
653857	ARP3 actin-related protein 3 homolog C (yeast)	ACTR3C	2.4924	2.01e-119	1.52e-118
93973	ARP8 actin-related protein 8 homolog (yeast)	ACTR8	-0.64845	3.08e-99	1.58e-98
90	activin A receptor, type I	ACVR1	-0.88071	5.14e-91	2.26e-90
91	activin A receptor, type IB	ACVR1B	0.69181	1.06e-53	2.62e-53
130399	activin A receptor, type IC	ACVR1C	2.4289	3.97e-80	1.45e-79
95	aminoacylase 1	ACY1	2.0177	3.59e-172	9.42e-171
91703	aspartoacylase (aminocyclase) 3	ACY3	-0.8665	3.09e-08	3.88e-08
97	acylphosphatase 1, erythrocyte (common) type	ACYP1	1.4559	7.35e-139	8.78e-138
100	adenosine deaminase	ADA	-0.36267	1.53e-06	1.86e-06
161931	adenosine deaminase domain containing 2	ADAD2	0.83488	2.95e-11	3.91e-11
102	ADAM metallopeptidase domain 10	ADAM10	-0.81171	7.47e-98	3.73e-97
4185	ADAM metallopeptidase domain 11	ADAM11	3.9631	2.99e-181	9.23e-180
8038	ADAM metallopeptidase domain 12	ADAM12	-0.62667	1.17e-07	1.45e-07
8751	ADAM metallopeptidase domain 15	ADAM15	-0.13783	0.0010039	0.0011445
6868	ADAM metallopeptidase domain 17	ADAM17	-1.0493	3.2e-88	1.34e-87
8728	ADAM metallopeptidase domain 19	ADAM19	0.35234	2.73e-06	3.3e-06
8748	ADAM metallopeptidase domain 20	ADAM20	1.0664	2.82e-30	4.94e-30
8747	ADAM metallopeptidase domain 21	ADAM21	0.52337	6.15e-10	7.97e-10
8745	ADAM metallopeptidase domain 23	ADAM23	1.2547	1.06e-52	2.57e-52
10863	ADAM metallopeptidase domain 28	ADAM28	-1.9279	4.29e-55	1.08e-54
11086	ADAM metallopeptidase domain 29	ADAM29	0.72826	4.19e-07	5.14e-07
203102	ADAM metallopeptidase domain 32	ADAM32	1.0469	8.12e-51	1.92e-50
80332	ADAM metallopeptidase domain 33	ADAM33	3.105	1.38e-112	9.14e-112
101	ADAM metallopeptidase domain 8	ADAM8	0.28084	0.00060094	0.00068856
8754	ADAM metallopeptidase domain 9	ADAM9	-1.3679	9.17e-103	5.01e-102
27299	ADAM-like, decysin 1	ADAMDEC1	-3.5633	9.08e-64	2.57e-63
9510	ADAM metallopeptidase with thrombospondin type 1 motif, 1	ADAMTS1	1.3389	1.05e-28	1.81e-28
81794	ADAM metallopeptidase with thrombospondin type 1 motif, 10	ADAMTS10	1.2484	2.59e-83	9.94e-83
81792	ADAM metallopeptidase with thrombospondin type 1 motif, 12	ADAMTS12	-3.5681	1.08e-134	1.15e-133
11093	ADAM metallopeptidase with thrombospondin type 1 motif, 13	ADAMTS13	1.2152	3.68e-64	1.05e-63
140766	ADAM metallopeptidase with thrombospondin type 1 motif, 14	ADAMTS14	0.54737	4.85e-05	5.71e-05
170689	ADAM metallopeptidase with thrombospondin type 1 motif, 15	ADAMTS15	-2.2997	2.38e-78	8.5e-78
170690	ADAM metallopeptidase with thrombospondin type 1 motif, 16	ADAMTS16	1.0505	1.01e-24	1.63e-24
170691	ADAM metallopeptidase with thrombospondin type 1 motif, 17	ADAMTS17	1.1189	2.46e-45	5.36e-45
171019	ADAM metallopeptidase with thrombospondin type 1 motif, 19	ADAMTS19	1.9137	1.3e-56	3.33e-56
9509	ADAM metallopeptidase with thrombospondin type 1 motif, 2	ADAMTS2	0.51742	8.86e-10	1.14e-09
80070	ADAM metallopeptidase with thrombospondin type 1 motif, 20	ADAMTS20	-2.4045	5.71e-33	1.04e-32
9508	ADAM metallopeptidase with thrombospondin type 1 motif, 3	ADAMTS3	1.4299	1.42e-27	2.4e-27
9507	ADAM metallopeptidase with thrombospondin type 1 motif, 4	ADAMTS4	-0.43464	0.00083074	0.00094858
11096	ADAM metallopeptidase with thrombospondin type 1 motif, 5	ADAMTS5	-2.0572	3.8e-88	1.59e-87
11174	ADAM metallopeptidase with thrombospondin type 1 motif, 6	ADAMTS6	-2.0623	2.88e-98	1.45e-97
11173	ADAM metallopeptidase with thrombospondin type 1 motif, 7	ADAMTS7	-0.19223	0.036211	0.039272
11095	ADAM metallopeptidase with thrombospondin type 1 motif, 8	ADAMTS8	1.7119	2.82e-74	9.44e-74
56999	ADAM metallopeptidase with thrombospondin type 1 motif, 9	ADAMTS9	-1.2151	5.47e-20	8.26e-20
92949	ADAMTS-like 1	ADAMTSL1	-0.81065	1.35e-12	1.82e-12
9719	ADAMTS-like 2	ADAMTSL2	-0.29867	2.6e-08	3.28e-08
57188	ADAMTS-like 3	ADAMTSL3	0.32228	0.00037883	0.00043661
54507	ADAMTS-like 4	ADAMTSL4	-0.2394	0.028517	0.031064
339366	ADAMTS-like 5	ADAMTSL5	2.4293	6.85e-108	4.13e-107
11033	ArfGAP with dual PH domains 1	ADAP1	3.0689	5.84e-171	1.49e-169
55803	ArfGAP with dual PH domains 2	ADAP2	-1.7975	2.86e-93	1.31e-92
104	adenosine deaminase, RNA-specific, B1	ADARB1	1.8081	3.99e-125	3.45e-124
23536	adenosine deaminase, tRNA-specific 1	ADAT1	-0.84325	4.11e-97	2.02e-96
134637	adenosine deaminase, tRNA-specific 2	ADAT2	0.5624	2.92e-33	5.32e-33
113179	adenosine deaminase, tRNA-specific 3	ADAT3	-0.20013	0.014668	0.016123
90956	aarF domain containing kinase 2	ADCK2	-0.44218	8.7e-31	1.53e-30
203054	aarF domain containing kinase 5	ADCK5	1.1767	1.09e-94	5.13e-94
107	adenylate cyclase 1 (brain)	ADCY1	3.4918	8.17e-146	1.13e-144
55811	adenylate cyclase 10 (soluble)	ADCY10	1.477	9.3e-70	2.91e-69
108	adenylate cyclase 2 (brain)	ADCY2	0.73946	4.07e-21	6.25e-21
109	adenylate cyclase 3	ADCY3	0.27092	2.86e-10	3.73e-10
196883	adenylate cyclase 4	ADCY4	1.2288	3.61e-49	8.33e-49
111	adenylate cyclase 5	ADCY5	2.0011	2.8e-109	1.74e-108
112	adenylate cyclase 6	ADCY6	0.44821	9.71e-27	1.62e-26
113	adenylate cyclase 7	ADCY7	-1.3193	1.94e-54	4.81e-54
114	adenylate cyclase 8 (brain)	ADCY8	-0.58698	6.32e-11	8.33e-11
115	adenylate cyclase 9	ADCY9	0.64325	1.77e-48	4.05e-48
116	adenylate cyclase activating polypeptide 1 (pituitary)	ADCYAP1	4.4778	3.44e-132	3.46e-131
117	adenylate cyclase activating polypeptide 1 (pituitary) receptor type I	ADCYAP1R1	-1.0401	1.83e-29	3.17e-29
119	adducin 2 (beta)	ADD2	1.0854	4.63e-35	8.67e-35
120	adducin 3 (gamma)	ADD3	0.3861	2.53e-08	3.19e-08
79747	androglobin	ADGB	0.41529	0.0040588	0.0045404
125	alcohol dehydrogenase 1B (class I), beta polypeptide	ADH1B	2.8833	1.96e-83	7.56e-83
126	alcohol dehydrogenase 1C (class I), gamma polypeptide	ADH1C	1.0186	1.19e-13	1.64e-13
128	alcohol dehydrogenase 5 (class III), chi polypeptide	ADH5	-0.42042	1.39e-26	2.31e-26
130	alcohol dehydrogenase 6 (class V)	ADH6	-2.1167	4.85e-50	1.14e-49
137872	alcohol dehydrogenase, iron containing, 1	ADHFE1	0.61999	6.69e-14	9.26e-14
9370	adiponectin, C1Q and collagen domain containing	ADIPOQ	2.8072	3.17e-62	8.77e-62
79602	adiponectin receptor 2	ADIPOR2	-0.45139	3.18e-15	4.49e-15
133	adrenomedullin	ADM	0.38323	0.01382	0.015206
79924	adrenomedullin 2	ADM2	-1.3581	1.64e-23	2.62e-23
84890	2-aminoethanethiol (cysteamine) dioxygenase	ADO	-0.37936	3.03e-23	4.79e-23
134	adenosine A1 receptor	ADORA1	0.72601	2.73e-24	4.39e-24
135	adenosine A2a receptor	ADORA2A	5.3557	1.94e-288	2.26e-286
136	adenosine A2b receptor	ADORA2B	1.4833	2.05e-49	4.74e-49
140	adenosine A3 receptor	ADORA3	-2.2888	1.49e-80	5.5e-80
141	ADP-ribosylarginine hydrolase	ADPRH	-1.154	1.09e-46	2.44e-46
113622	ADP-ribosylhydrolase like 1	ADPRHL1	1.9999	1.04e-126	9.27e-126
148	adrenergic, alpha-1A-, receptor	ADRA1A	0.60755	8.58e-09	1.09e-08
147	adrenergic, alpha-1B-, receptor	ADRA1B	2.3245	2.91e-88	1.22e-87
146	adrenergic, alpha-1D-, receptor	ADRA1D	1.6135	1.48e-39	2.96e-39
150	adrenergic, alpha-2A-, receptor	ADRA2A	1.7964	4.45e-58	1.16e-57
152	adrenergic, alpha-2C-, receptor	ADRA2C	3.0049	9.11e-147	1.29e-145
153	adrenergic, beta-1-, receptor	ADRB1	2.6368	5.65e-148	8.23e-147
154	adrenergic, beta-2-, receptor, surface	ADRB2	-0.35108	2.28e-05	2.7e-05
155	adrenergic, beta-3-, receptor	ADRB3	2.6853	6.99e-66	2.04e-65
158	adenylosuccinate lyase	ADSL	-1.0367	1.05e-146	1.48e-145
159	adenylosuccinate synthase	ADSS	0.34758	1.38e-17	2.02e-17
122622	adenylosuccinate synthase like 1	ADSSL1	0.574	1.44e-16	2.07e-16
84830	androgen-dependent TFPI-regulating protein	ADTRP	3.5999	9.94e-106	5.76e-105
165	AE binding protein 1	AEBP1	-0.9136	1.15e-11	1.54e-11
64782	apoptosis enhancing nuclease	AEN	-0.92804	4.66e-45	1.01e-44
166	amino-terminal enhancer of split	AES	1.0567	1.04e-102	5.68e-102
60312	actin filament associated protein 1	AFAP1	-0.82403	9.74e-58	2.53e-57
134265	actin filament associated protein 1-like 1	AFAP1L1	-0.83874	4.75e-25	7.71e-25
84632	actin filament associated protein 1-like 2	AFAP1L2	0.63558	5.87e-19	8.75e-19
4299	AF4/FMR2 family, member 1	AFF1	-0.15447	0.00098691	0.0011252
2334	AF4/FMR2 family, member 2	AFF2	1.5822	3.33e-29	5.76e-29
3899	AF4/FMR2 family, member 3	AFF3	0.90798	2.65e-36	5.04e-36
27125	AF4/FMR2 family, member 4	AFF4	-0.43509	5.19e-35	9.71e-35
10939	AFG3 ATPase family gene 3-like 2 (S. cerevisiae)	AFG3L2	-0.27675	8.6e-13	1.17e-12
125061	arylformamidase	AFMID	0.33625	5.17e-12	6.94e-12
174	alpha-fetoprotein	AFP	1.5732	3.63e-21	5.57e-21
54812	aftiphilin	AFTPH	0.83489	1.99e-94	9.28e-94
175	aspartylglucosaminidase	AGA	-0.97533	2.53e-60	6.81e-60
116987	ArfGAP with GTPase domain, ankyrin repeat and PH domain 1	AGAP1	1.1876	2.06e-97	1.02e-96
116986	ArfGAP with GTPase domain, ankyrin repeat and PH domain 2	AGAP2	2.3774	6.84e-87	2.8e-86
116988	ArfGAP with GTPase domain, ankyrin repeat and PH domain 3	AGAP3	1.847	2.01e-190	7.48e-189
729092	ArfGAP with GTPase domain, ankyrin repeat and PH domain 5	AGAP5	3.6652	5.51e-249	4.29e-247
414189	ArfGAP with GTPase domain, ankyrin repeat and PH domain 6	AGAP6	1.4413	7.53e-110	4.73e-109
123624	ATP/GTP binding protein-like 1	AGBL1	0.83987	2.24e-10	2.92e-10
79841	ATP/GTP binding protein-like 2	AGBL2	-0.38162	0.00040183	0.00046265
340351	ATP/GTP binding protein-like 3	AGBL3	-1.5804	1.18e-168	2.87e-167
84871	ATP/GTP binding protein-like 4	AGBL4	2.6295	8.51e-102	4.57e-101
177	advanced glycosylation end product-specific receptor	AGER	-0.58032	4.1e-14	5.7e-14
3268	ArfGAP with FG repeats 2	AGFG2	-0.17266	0.00017648	0.00020502
55750	acylglycerol kinase	AGK	0.30541	3.4e-20	5.16e-20
178	amylo-alpha-1, 6-glucosidase, 4-alpha-glucanotransferase	AGL	0.34022	1.41e-14	1.96e-14
79814	agmatine ureohydrolase (agmatinase)	AGMAT	0.84749	4.33e-23	6.84e-23
392636	alkylglycerol monooxygenase	AGMO	-3.237	1.67e-86	6.78e-86
10555	1-acylglycerol-3-phosphate O-acyltransferase 2 (lysophosphatidic acid acyltransferase, beta)	AGPAT2	0.60764	6.06e-25	9.82e-25
56895	1-acylglycerol-3-phosphate O-acyltransferase 4 (lysophosphatidic acid acyltransferase, delta)	AGPAT4	0.5177	3.97e-21	6.09e-21
55326	1-acylglycerol-3-phosphate O-acyltransferase 5 (lysophosphatidic acid acyltransferase, epsilon)	AGPAT5	-1.1204	2.1e-114	1.44e-113
123688	aminoglycoside phosphotransferase domain containing 1	AGPHD1	-0.10642	0.046177	0.049905
8540	alkylglycerone phosphate synthase	AGPS	-0.68976	8.27e-103	4.52e-102
10551	anterior gradient 2 homolog (Xenopus laevis)	AGR2	0.95656	1.86e-08	2.35e-08
375790	agrin	AGRN	-0.29042	1.88e-08	2.37e-08
181	agouti related protein homolog (mouse)	AGRP	0.68945	6.69e-13	9.12e-13
183	angiotensinogen (serpin peptidase inhibitor, clade A, member 8)	AGT	-1.2326	1.34e-36	2.57e-36
23287	ATP/GTP binding protein 1	AGTPBP1	0.96634	9.35e-68	2.83e-67
185	angiotensin II receptor, type 1	AGTR1	0.3476	0.0075579	0.0083923
57085	angiotensin II receptor-associated protein	AGTRAP	-1.2002	4.84e-42	1e-41
189	alanine-glyoxylate aminotransferase	AGXT	0.68018	4.24e-05	5e-05
64850	alanine-glyoxylate aminotransferase 2-like 1	AGXT2L1	2.1504	1.2e-34	2.24e-34
85007	alanine-glyoxylate aminotransferase 2-like 2	AGXT2L2	-0.4491	3.86e-25	6.27e-25
191	adenosylhomocysteinase	AHCY	-1.012	6.61e-146	9.2e-145
10768	adenosylhomocysteinase-like 1	AHCYL1	0.1704	0.022734	0.02483
27245	AT hook, DNA binding motif, containing 1	AHDC1	0.18112	2.58e-06	3.12e-06
54806	Abelson helper integration site 1	AHI1	1.7317	2.33e-146	3.27e-145
113146	AHNAK nucleoprotein 2	AHNAK2	3.118	5.37e-124	4.5e-123
196	aryl hydrocarbon receptor	AHR	-0.93884	8.53e-30	1.48e-29
57491	aryl-hydrocarbon receptor repressor	AHRR	1.6331	4.23e-84	1.65e-83
10598	AHA1, activator of heat shock 90kDa protein ATPase homolog 1 (yeast)	AHSA1	0.39666	4.35e-22	6.78e-22
197	alpha-2-HS-glycoprotein	AHSG	0.32483	0.0088327	0.0097885
51327	alpha hemoglobin stabilizing protein	AHSP	0.43168	0.012812	0.014108
64853	axin interactor, dorsalization associated	AIDA	0.20078	9.92e-07	1.21e-06
199	allograft inflammatory factor 1	AIF1	-2.4956	3.44e-84	1.35e-83
83543	allograft inflammatory factor 1-like	AIF1L	-0.17278	0.022901	0.025009
84883	apoptosis-inducing factor, mitochondrion-associated, 2	AIFM2	0.96375	6.56e-73	2.15e-72
150209	apoptosis-inducing factor, mitochondrion-associated, 3	AIFM3	3.797	1.09e-136	1.23e-135
9447	absent in melanoma 2	AIM2	-2.1619	1.32e-63	3.72e-63
9255	aminoacyl tRNA synthetase complex-interacting multifunctional protein 1	AIMP1	-0.60339	1.7e-77	6e-77
7965	aminoacyl tRNA synthetase complex-interacting multifunctional protein 2	AIMP2	-1.7469	5.09e-235	3.43e-233
23746	aryl hydrocarbon receptor interacting protein-like 1	AIPL1	2.0502	1.95e-52	4.71e-52
326	autoimmune regulator	AIRE	1.7937	6.04e-58	1.57e-57
55966	adherens junctions associated protein 1	AJAP1	2.7668	1.69e-111	1.09e-110
84962	ajuba LIM protein	AJUBA	-1.4672	7.06e-53	1.72e-52
203	adenylate kinase 1	AK1	2.5343	2.03e-238	1.4e-236
204	adenylate kinase 2	AK2	-0.61768	1.53e-40	3.09e-40
205	adenylate kinase 4	AK4	0.91334	2.71e-35	5.1e-35
26289	adenylate kinase 5	AK5	3.533	7.69e-119	5.78e-118
122481	adenylate kinase 7	AK7	2.0467	2.95e-69	9.13e-69
158067	adenylate kinase 8	AK8	-0.77933	1.6e-30	2.82e-30
11215	A kinase (PRKA) anchor protein 11	AKAP11	0.65528	4.44e-30	7.76e-30
9590	A kinase (PRKA) anchor protein 12	AKAP12	1.4503	1.7e-72	5.55e-72
11214	A kinase (PRKA) anchor protein 13	AKAP13	-1.0304	1.75e-106	1.03e-105
158798	A kinase (PRKA) anchor protein 14	AKAP14	1.1027	2.59e-21	3.99e-21
8227	A kinase (PRKA) anchor protein 17A	AKAP17A	0.24912	9.08e-10	1.17e-09
11217	A kinase (PRKA) anchor protein 2	AKAP2	8.0876	0	0
10566	A kinase (PRKA) anchor protein 3	AKAP3	-1.0766	1.29e-52	3.14e-52
9495	A kinase (PRKA) anchor protein 5	AKAP5	2.6956	2.72e-112	1.79e-111
9472	A kinase (PRKA) anchor protein 6	AKAP6	0.67682	1.15e-25	1.88e-25
26993	A kinase (PRKA) anchor protein 8-like	AKAP8L	0.61989	6.78e-51	1.61e-50
80709	AT-hook transcription factor	AKNA	-0.60222	5.51e-37	1.06e-36
254268	AKNA domain containing 1	AKNAD1	-1.7246	6.63e-68	2.01e-67
57016	aldo-keto reductase family 1, member B10 (aldose reductase)	AKR1B10	-1.0642	8.14e-10	1.05e-09
441282	aldo-keto reductase family 1, member B15	AKR1B15	-3.596	2.69e-125	2.33e-124
1645	aldo-keto reductase family 1, member C1 (dihydrodiol dehydrogenase 1; 20-alpha (3-alpha)-hydroxysteroid dehydrogenase)	AKR1C1	0.63588	3.7e-09	4.73e-09
1646	aldo-keto reductase family 1, member C2 (dihydrodiol dehydrogenase 2; bile acid binding protein; 3-alpha hydroxysteroid dehydrogenase, type III)	AKR1C2	1.9796	6.17e-63	1.72e-62
8644	aldo-keto reductase family 1, member C3 (3-alpha hydroxysteroid dehydrogenase, type II)	AKR1C3	-0.33425	0.00064284	0.00073589
83592	aldo-keto reductase family 1, member E2	AKR1E2	2.2015	1.43e-140	1.76e-139
8574	aldo-keto reductase family 7, member A2 (aflatoxin aldehyde reductase)	AKR7A2	-0.34381	2.84e-15	4.02e-15
22977	aldo-keto reductase family 7, member A3 (aflatoxin aldehyde reductase)	AKR7A3	1.4562	6.73e-76	2.3e-75
208	v-akt murine thymoma viral oncogene homolog 2	AKT2	0.077837	0.031562	0.03431
10000	v-akt murine thymoma viral oncogene homolog 3 (protein kinase B, gamma)	AKT3	0.20182	0.00016304	0.00018957
64400	AKT interacting protein	AKTIP	0.83907	2.51e-110	1.59e-109
210	aminolevulinate dehydratase	ALAD	0.62496	5.63e-43	1.18e-42
212	aminolevulinate, delta-, synthase 2	ALAS2	1.2984	5.86e-12	7.86e-12
213	albumin	ALB	1.6776	4.63e-41	9.45e-41
214	activated leukocyte cell adhesion molecule	ALCAM	-0.85213	3.99e-42	8.26e-42
126133	aldehyde dehydrogenase 16 family, member A1	ALDH16A1	-0.77337	2.67e-49	6.16e-49
5832	aldehyde dehydrogenase 18 family, member A1	ALDH18A1	-0.76784	2.9e-95	1.37e-94
216	aldehyde dehydrogenase 1 family, member A1	ALDH1A1	1.3836	8.45e-39	1.67e-38
8854	aldehyde dehydrogenase 1 family, member A2	ALDH1A2	0.39566	4.2e-06	5.06e-06
220	aldehyde dehydrogenase 1 family, member A3	ALDH1A3	3.3489	2.28e-130	2.21e-129
219	aldehyde dehydrogenase 1 family, member B1	ALDH1B1	-1.105	1.43e-115	9.98e-115
10840	aldehyde dehydrogenase 1 family, member L1	ALDH1L1	0.33175	0.0016045	0.001819
160428	aldehyde dehydrogenase 1 family, member L2	ALDH1L2	-0.535	1.94e-17	2.83e-17
217	aldehyde dehydrogenase 2 family (mitochondrial)	ALDH2	1.1745	2.7e-50	6.34e-50
218	aldehyde dehydrogenase 3 family, member A1	ALDH3A1	0.22425	0.021358	0.023348
224	aldehyde dehydrogenase 3 family, member A2	ALDH3A2	-0.73622	1.08e-89	4.62e-89
222	aldehyde dehydrogenase 3 family, member B2	ALDH3B2	1.816	4.85e-30	8.47e-30
8659	aldehyde dehydrogenase 4 family, member A1	ALDH4A1	1.0865	1.96e-35	3.69e-35
7915	aldehyde dehydrogenase 5 family, member A1	ALDH5A1	0.53537	4.26e-18	6.28e-18
4329	aldehyde dehydrogenase 6 family, member A1	ALDH6A1	0.95705	4.16e-34	7.68e-34
501	aldehyde dehydrogenase 7 family, member A1	ALDH7A1	0.53104	2.55e-11	3.38e-11
64577	aldehyde dehydrogenase 8 family, member A1	ALDH8A1	2.6736	4.46e-139	5.35e-138
223	aldehyde dehydrogenase 9 family, member A1	ALDH9A1	-0.71659	2.08e-38	4.07e-38
226	aldolase A, fructose-bisphosphate	ALDOA	0.54049	1.92e-38	3.77e-38
229	aldolase B, fructose-bisphosphate	ALDOB	1.0873	3.02e-44	6.46e-44
230	aldolase C, fructose-bisphosphate	ALDOC	0.65081	1.58e-14	2.21e-14
440138	asparagine-linked glycosylation 11, alpha-1,2-mannosyltransferase homolog (yeast)	ALG11	-1.4	2.55e-108	1.55e-107
200810	asparagine-linked glycosylation 1-like	ALG1L	-0.24942	0.016662	0.018279
10195	asparagine-linked glycosylation 3, alpha-1,3- mannosyltransferase homolog (S. cerevisiae)	ALG3	-0.77206	6.21e-91	2.73e-90
29880	asparagine-linked glycosylation 5, dolichyl-phosphate beta-glucosyltransferase homolog (S. cerevisiae)	ALG5	-0.80688	9.74e-73	3.19e-72
29929	asparagine-linked glycosylation 6, alpha-1,3-glucosyltransferase homolog (S. cerevisiae)	ALG6	-0.5204	1.53e-30	2.7e-30
79053	asparagine-linked glycosylation 8, alpha-1,3-glucosyltransferase homolog (S. cerevisiae)	ALG8	-0.73504	4.47e-99	2.29e-98
79796	asparagine-linked glycosylation 9, alpha-1,2-mannosyltransferase homolog (S. cerevisiae)	ALG9	0.83204	6.04e-138	7.02e-137
238	anaplastic lymphoma receptor tyrosine kinase	ALK	0.26165	0.0016722	0.0018939
8846	alkB, alkylation repair homolog 1 (E. coli)	ALKBH1	-0.50691	2.88e-65	8.32e-65
121642	alkB, alkylation repair homolog 2 (E. coli)	ALKBH2	-1.0769	4.36e-108	2.64e-107
84964	alkB, alkylation repair homolog 6 (E. coli)	ALKBH6	2.8353	2e-259	1.77e-257
84266	alkB, alkylation repair homolog 7 (E. coli)	ALKBH7	-0.10681	0.013934	0.015328
91801	alkB, alkylation repair homolog 8 (E. coli)	ALKBH8	-0.40994	1.76e-28	3.01e-28
55821	allantoicase	ALLC	2.0386	1.5e-38	2.94e-38
7840	Alstrom syndrome 1	ALMS1	-0.5447	9.35e-36	1.77e-35
239	arachidonate 12-lipoxygenase	ALOX12	-1.5284	6.23e-116	4.41e-115
242	arachidonate 12-lipoxygenase, 12R type	ALOX12B	2.393	7.95e-60	2.13e-59
246	arachidonate 15-lipoxygenase	ALOX15	2.6472	1.7e-83	6.56e-83
240	arachidonate 5-lipoxygenase	ALOX5	-1.2986	9.18e-31	1.62e-30
241	arachidonate 5-lipoxygenase-activating protein	ALOX5AP	-2.6236	2.39e-65	6.91e-65
59344	arachidonate lipoxygenase 3	ALOXE3	3.1073	2.78e-109	1.73e-108
80216	alpha-kinase 1	ALPK1	-0.68837	8.66e-16	1.23e-15
115701	alpha-kinase 2	ALPK2	-1.5547	1.97e-20	3e-20
249	alkaline phosphatase, liver/bone/kidney	ALPL	0.51323	3.26e-14	4.53e-14
57679	amyotrophic lateral sclerosis 2 (juvenile)	ALS2	0.51953	4.09e-43	8.6e-43
259173	ALS2 C-terminal like	ALS2CL	3.6825	6.12e-184	2.02e-182
130540	amyotrophic lateral sclerosis 2 (juvenile) chromosome region, candidate 12	ALS2CR12	0.85338	1.04e-31	1.86e-31
79800	amyotrophic lateral sclerosis 2 (juvenile) chromosome region, candidate 8	ALS2CR8	0.18911	9.65e-06	1.15e-05
8092	ALX homeobox 1	ALX1	0.5225	0.0011654	0.0013259
257	ALX homeobox 3	ALX3	-1.1537	1.52e-15	2.16e-15
10189	Aly/REF export factor	ALYREF	-1.4301	8.49e-163	1.78e-161
23600	alpha-methylacyl-CoA racemase	AMACR	2.3804	3.07e-220	1.75e-218
259	alpha-1-microglobulin/bikunin precursor	AMBP	1.807	1e-34	1.87e-34
55626	autophagy/beclin-1 regulator 1	AMBRA1	-0.10526	0.0017045	0.0019303
262	adenosylmethionine decarboxylase 1	AMD1	0.16788	9.31e-06	1.11e-05
144193	amidohydrolase domain containing 1	AMDHD1	-0.31263	4.98e-05	5.86e-05
51005	amidohydrolase domain containing 2	AMDHD2	-0.23907	3.78e-07	4.65e-07
268	anti-Mullerian hormone	AMH	-0.99299	4.61e-16	6.6e-16
57463	adhesion molecule with Ig-like domain 1	AMIGO1	1.5453	1.2e-86	4.9e-86
347902	adhesion molecule with Ig-like domain 2	AMIGO2	1.0162	6.76e-22	1.05e-21
83607	AMME chromosomal region gene 1-like	AMMECR1L	-0.64102	2.15e-104	1.21e-103
196394	antagonist of mitotic exit network 1 homolog (S. cerevisiae)	AMN1	1.1075	2.01e-87	8.28e-87
154796	angiomotin	AMOT	0.51566	3.16e-10	4.12e-10
154810	angiomotin like 1	AMOTL1	-0.94277	1.18e-70	3.76e-70
51421	angiomotin like 2	AMOTL2	-1.0987	2.35e-59	6.23e-59
270	adenosine monophosphate deaminase 1	AMPD1	1.8292	4.02e-31	7.12e-31
271	adenosine monophosphate deaminase 2	AMPD2	0.86266	1.49e-71	4.79e-71
272	adenosine monophosphate deaminase 3	AMPD3	0.43198	7.35e-12	9.84e-12
273	amphiphysin	AMPH	2.26	5.09e-84	1.99e-83
275	aminomethyltransferase	AMT	1.1096	7.46e-58	1.94e-57
279	amylase, alpha 2A (pancreatic)	AMY2A	4.7908	1.13e-178	3.34e-177
280	amylase, alpha 2B (pancreatic)	AMY2B	2.5151	2.4e-162	4.96e-161
155185	archaelysin family metallopeptidase 1	AMZ1	0.54727	3.22e-10	4.2e-10
64682	anaphase promoting complex subunit 1	ANAPC1	0.3538	8.5e-21	1.3e-20
10393	anaphase promoting complex subunit 10	ANAPC10	-0.41115	1.34e-32	2.42e-32
119504	anaphase promoting complex subunit 16	ANAPC16	-0.26074	4.01e-12	5.39e-12
283	angiogenin, ribonuclease, RNase A family, 5	ANG	-1.4461	1.55e-34	2.89e-34
284	angiopoietin 1	ANGPT1	-0.62725	1.25e-07	1.55e-07
285	angiopoietin 2	ANGPT2	-1.065	2.58e-14	3.6e-14
51378	angiopoietin 4	ANGPT4	-1.8608	8.87e-46	1.95e-45
9068	angiopoietin-like 1	ANGPTL1	-0.37612	0.0015495	0.0017574
23452	angiopoietin-like 2	ANGPTL2	-3.7657	2.85e-195	1.16e-193
51129	angiopoietin-like 4	ANGPTL4	0.65175	6.2e-06	7.45e-06
253935	angiopoietin-like 5	ANGPTL5	0.63254	1.94e-07	2.4e-07
83854	angiopoietin-like 6	ANGPTL6	-0.26614	5.53e-05	6.5e-05
10218	angiopoietin-like 7	ANGPTL7	1.7726	7.96e-38	1.55e-37
286	ankyrin 1, erythrocytic	ANK1	1.9303	1.29e-65	3.75e-65
287	ankyrin 2, neuronal	ANK2	1.1693	5.74e-78	2.04e-77
288	ankyrin 3, node of Ranvier (ankyrin G)	ANK3	2.3768	1.84e-98	9.33e-98
150709	ankyrin and armadillo repeat containing	ANKAR	-0.14758	0.00021077	0.00024413
348094	ankyrin repeat and death domain containing 1A	ANKDD1A	1.6346	5.22e-128	4.79e-127
162282	ankyrin-repeat and fibronectin type III domain containing 1	ANKFN1	-2.2846	3.88e-101	2.05e-100
51479	ankyrin repeat and FYVE domain containing 1	ANKFY1	-1.3224	6.14e-160	1.19e-158
56172	ankylosis, progressive homolog (mouse)	ANKH	0.9118	1.24e-93	5.72e-93
54882	ankyrin repeat and KH domain containing 1	ANKHD1	4.3103	0	0
54467	ankyrin repeat and IBR domain containing 1	ANKIB1	-0.99582	3.33e-93	1.52e-92
255239	ankyrin repeat and kinase domain containing 1	ANKK1	2.7736	1.02e-94	4.8e-94
126549	ankyrin repeat and LEM domain containing 1	ANKLE1	0.83742	1.04e-38	2.05e-38
57037	ankyrin repeat and MYND domain containing 2	ANKMY2	0.38556	3.53e-23	5.59e-23
57763	ankyrin repeat, family A (RFXANK-like), 2	ANKRA2	-0.74397	1.44e-88	6.05e-88
27063	ankyrin repeat domain 1 (cardiac muscle)	ANKRD1	2.2802	4.89e-50	1.14e-49
29123	ankyrin repeat domain 11	ANKRD11	0.544	3.11e-46	6.87e-46
88455	ankyrin repeat domain 13A	ANKRD13A	-0.515	1.72e-46	3.81e-46
124930	ankyrin repeat domain 13B	ANKRD13B	0.74012	8.12e-39	1.6e-38
338692	ankyrin repeat domain 13 family, member D	ANKRD13D	1.1679	3.43e-144	4.6e-143
54522	ankyrin repeat domain 16	ANKRD16	-0.12939	0.0013493	0.0015327
253650	ankyrin repeat domain 18A	ANKRD18A	2.0587	1.42e-51	3.39e-51
441459	ankyrin repeat domain 18B	ANKRD18B	4.4655	1.55e-137	1.78e-136
26287	ankyrin repeat domain 2 (stretch responsive muscle)	ANKRD2	3.1179	2.49e-124	2.1e-123
441430	ankyrin repeat domain 20 family, member A2	ANKRD20A2	0.56494	3.53e-05	4.17e-05
728747	ankyrin repeat domain 20 family, member A4	ANKRD20A4	0.756	1.02e-06	1.24e-06
118932	ankyrin repeat domain 22	ANKRD22	-3.9529	7.55e-66	2.2e-65
200539	ankyrin repeat domain 23	ANKRD23	-0.56009	1.84e-17	2.68e-17
170961	ankyrin repeat domain 24	ANKRD24	3.3477	2.71e-181	8.39e-180
22852	ankyrin repeat domain 26	ANKRD26	0.64544	1.26e-32	2.28e-32
147463	ankyrin repeat domain 29	ANKRD29	3.1253	8.85e-172	2.3e-170
374860	ankyrin repeat domain 30B	ANKRD30B	5.8702	1.6e-209	7.92e-208
554226	ankyrin repeat domain 30B-like	ANKRD30BL	3.5009	1.28e-121	1.02e-120
256006	ankyrin repeat domain 31	ANKRD31	0.83112	2.43e-18	3.59e-18
341405	ankyrin repeat domain 33	ANKRD33	2.5298	1.97e-68	6.02e-68
651746	ankyrin repeat domain 33B	ANKRD33B	-2.8526	1.87e-108	1.14e-107
340120	ankyrin repeat domain 34B	ANKRD34B	3.1641	3.89e-94	1.81e-93
390616	ankyrin repeat domain 34C	ANKRD34C	5.1938	1.11e-146	1.56e-145
148741	ankyrin repeat domain 35	ANKRD35	1.6877	3.58e-69	1.11e-68
375248	ankyrin repeat domain 36	ANKRD36	0.96779	3.15e-44	6.74e-44
353322	ankyrin repeat domain 37	ANKRD37	0.5134	7.08e-15	9.95e-15
51239	ankyrin repeat domain 39	ANKRD39	0.44802	1.5e-35	2.83e-35
338699	ankyrin repeat domain 42	ANKRD42	0.83413	4.95e-67	1.48e-66
91526	ankyrin repeat domain 44	ANKRD44	-2.9179	2.68e-236	1.81e-234
339416	ankyrin repeat domain 45	ANKRD45	0.51045	1.2e-10	1.57e-10
157567	ankyrin repeat domain 46	ANKRD46	0.31722	7.86e-09	1e-08
63926	ankyrin repeat domain 5	ANKRD5	0.38256	4.36e-06	5.25e-06
57182	ankyrin repeat domain 50	ANKRD50	-0.49503	4.14e-23	6.54e-23
283373	ankyrin repeat domain 52	ANKRD52	0.43342	5.49e-27	9.18e-27
79998	ankyrin repeat domain 53	ANKRD53	-0.4254	2.37e-08	2.99e-08
129138	ankyrin repeat domain 54	ANKRD54	0.55781	7.4e-71	2.35e-70
79722	ankyrin repeat domain 55	ANKRD55	1.6881	2.45e-48	5.58e-48
22881	ankyrin repeat domain 6	ANKRD6	-0.68604	1.3e-39	2.61e-39
342850	ankyrin repeat domain 62	ANKRD62	2.1345	8.05e-51	1.91e-50
100131244	ankyrin repeat domain 63	ANKRD63	1.5406	3.86e-25	6.27e-25
441869	ankyrin repeat domain 65	ANKRD65	2.2281	4.59e-125	3.96e-124
56311	ankyrin repeat domain 7	ANKRD7	-0.22815	0.025559	0.027865
122416	ankyrin repeat domain 9	ANKRD9	0.60344	1.13e-15	1.61e-15
23294	ankyrin repeat and sterile alpha motif domain containing 1A	ANKS1A	0.56877	8.47e-49	1.94e-48
56899	ankyrin repeat and sterile alpha motif domain containing 1B	ANKS1B	1.8702	5.28e-85	2.09e-84
124401	ankyrin repeat and sterile alpha motif domain containing 3	ANKS3	0.7276	8.15e-57	2.09e-56
257629	ankyrin repeat and sterile alpha motif domain containing 4B	ANKS4B	2.0263	3.84e-48	8.73e-48
203286	ankyrin repeat and sterile alpha motif domain containing 6	ANKS6	0.45276	3.38e-28	5.76e-28
389161	ankyrin repeat and ubiquitin domain containing 1	ANKUB1	-1.6184	3.17e-26	5.24e-26
55139	ankyrin repeat and zinc finger domain containing 1	ANKZF1	0.33772	3.48e-10	4.53e-10
54443	anillin, actin binding protein	ANLN	-0.26087	0.019113	0.020936
55107	anoctamin 1, calcium activated chloride channel	ANO1	1.1754	6.63e-50	1.55e-49
57101	anoctamin 2	ANO2	1.5577	4.31e-76	1.48e-75
63982	anoctamin 3	ANO3	3.5786	4.6e-113	3.09e-112
121601	anoctamin 4	ANO4	2.1876	4.57e-97	2.24e-96
203859	anoctamin 5	ANO5	2.0347	1.91e-78	6.83e-78
196527	anoctamin 6	ANO6	-1.6732	2.81e-90	1.22e-89
50636	anoctamin 7	ANO7	0.92977	3.43e-34	6.34e-34
57719	anoctamin 8	ANO8	0.42485	3.13e-14	4.35e-14
338440	anoctamin 9	ANO9	0.33958	0.0016251	0.0018421
8125	acidic (leucine-rich) nuclear phosphoprotein 32 family, member A	ANP32A	-0.51121	2.42e-63	6.8e-63
10541	acidic (leucine-rich) nuclear phosphoprotein 32 family, member B	ANP32B	-0.8252	1.41e-40	2.86e-40
290	alanyl (membrane) aminopeptidase	ANPEP	0.28577	0.0026043	0.002931
84168	anthrax toxin receptor 1	ANTXR1	-1.9028	4.19e-122	3.38e-121
118429	anthrax toxin receptor 2	ANTXR2	-1.3169	2.35e-68	7.18e-68
301	annexin A1	ANXA1	-1.6414	6.08e-32	1.09e-31
311	annexin A11	ANXA11	1.3401	3.5e-106	2.04e-105
312	annexin A13	ANXA13	-1.3723	1.89e-17	2.76e-17
302	annexin A2	ANXA2	-1.8224	7.1e-44	1.51e-43
306	annexin A3	ANXA3	2.7768	1.02e-112	6.8e-112
307	annexin A4	ANXA4	-0.29266	1.17e-08	1.48e-08
308	annexin A5	ANXA5	-1.596	5.26e-83	2.01e-82
309	annexin A6	ANXA6	0.24897	2.28e-05	2.7e-05
8416	annexin A9	ANXA9	-1.8777	5.34e-143	6.98e-142
313	acyloxyacyl hydrolase (neutrophil)	AOAH	-2.0922	4.31e-104	2.42e-103
314	amine oxidase, copper containing 2 (retina-specific)	AOC2	1.7058	4.35e-98	2.18e-97
8639	amine oxidase, copper containing 3 (vascular adhesion protein 1)	AOC3	0.7619	5.25e-16	7.52e-16
316	aldehyde oxidase 1	AOX1	0.77224	2.33e-13	3.2e-13
55435	adaptor-related protein complex 1 associated regulatory protein	AP1AR	0.44601	3.94e-24	6.32e-24
8906	adaptor-related protein complex 1, gamma 2 subunit	AP1G2	1.7499	2.33e-78	8.33e-78
10053	adaptor-related protein complex 1, mu 2 subunit	AP1M2	2.0121	2.83e-51	6.75e-51
1174	adaptor-related protein complex 1, sigma 1 subunit	AP1S1	0.63494	6.46e-32	1.16e-31
8905	adaptor-related protein complex 1, sigma 2 subunit	AP1S2	-0.20705	5.98e-05	7.02e-05
130340	adaptor-related protein complex 1, sigma 3 subunit	AP1S3	1.3828	5.39e-61	1.47e-60
160	adaptor-related protein complex 2, alpha 1 subunit	AP2A1	0.49366	8.15e-32	1.46e-31
161	adaptor-related protein complex 2, alpha 2 subunit	AP2A2	0.62119	1.11e-62	3.1e-62
1173	adaptor-related protein complex 2, mu 1 subunit	AP2M1	0.57776	1.4e-47	3.15e-47
1175	adaptor-related protein complex 2, sigma 1 subunit	AP2S1	0.75647	1.79e-50	4.23e-50
8546	adaptor-related protein complex 3, beta 1 subunit	AP3B1	-0.77398	2.33e-57	6.02e-57
8120	adaptor-related protein complex 3, beta 2 subunit	AP3B2	1.9355	3.82e-106	2.23e-105
26985	adaptor-related protein complex 3, mu 1 subunit	AP3M1	-1.0974	1.97e-138	2.32e-137
10947	adaptor-related protein complex 3, mu 2 subunit	AP3M2	0.96232	1.02e-73	3.39e-73
1176	adaptor-related protein complex 3, sigma 1 subunit	AP3S1	1.3362	5.27e-161	1.04e-159
10239	adaptor-related protein complex 3, sigma 2 subunit	AP3S2	1.0414	2.55e-175	7.14e-174
10717	adaptor-related protein complex 4, beta 1 subunit	AP4B1	0.53317	4.31e-56	1.09e-55
9179	adaptor-related protein complex 4, mu 1 subunit	AP4M1	-0.63719	7.36e-59	1.94e-58
11154	adaptor-related protein complex 4, sigma 1 subunit	AP4S1	-0.16246	0.00019623	0.00022751
91056	adaptor-related protein complex 5, beta 1 subunit	AP5B1	-1.4904	4.39e-154	7.47e-153
317	apoptotic peptidase activating factor 1	APAF1	0.38095	1.61e-21	2.48e-21
320	amyloid beta (A4) precursor protein-binding, family A, member 1	APBA1	2.0964	8.14e-140	9.92e-139
321	amyloid beta (A4) precursor protein-binding, family A, member 2	APBA2	0.60337	5.78e-32	1.04e-31
9546	amyloid beta (A4) precursor protein-binding, family A, member 3	APBA3	-0.69211	4.55e-56	1.15e-55
322	amyloid beta (A4) precursor protein-binding, family B, member 1 (Fe65)	APBB1	1.1364	1.77e-87	7.31e-87
54518	amyloid beta (A4) precursor protein-binding, family B, member 1 interacting protein	APBB1IP	-2.2705	3.61e-80	1.32e-79
323	amyloid beta (A4) precursor protein-binding, family B, member 2	APBB2	-0.64807	2.03e-46	4.49e-46
10307	amyloid beta (A4) precursor protein-binding, family B, member 3	APBB3	0.91637	1.45e-66	4.31e-66
324	adenomatous polyposis coli	APC	0.83113	2.45e-51	5.85e-51
147495	adenomatosis polyposis coli down-regulated 1	APCDD1	-0.55777	2.68e-13	3.67e-13
164284	adenomatosis polyposis coli down-regulated 1-like	APCDD1L	-1.8039	2.07e-22	3.24e-22
328	APEX nuclease (multifunctional DNA repair enzyme) 1	APEX1	-1.0655	7.6e-175	2.1e-173
27301	APEX nuclease (apurinic/apyrimidinic endonuclease) 2	APEX2	-0.79698	3.49e-122	2.82e-121
51107	anterior pharynx defective 1 homolog A (C. elegans)	APH1A	-1.3877	6.02e-174	1.62e-172
83464	anterior pharynx defective 1 homolog B (C. elegans)	APH1B	-0.6039	4.74e-53	1.16e-52
51074	APAF1 interacting protein	APIP	-0.095637	0.011871	0.013089
200558	aprataxin and PNKP like factor	APLF	-0.17779	0.0006212	0.00071147
8862	apelin	APLN	-1.01	2.54e-28	4.33e-28
187	apelin receptor	APLNR	-1.4425	6.25e-19	9.3e-19
333	amyloid beta (A4) precursor-like protein 1	APLP1	1.1249	9.31e-63	2.59e-62
334	amyloid beta (A4) precursor-like protein 2	APLP2	-0.10533	0.0016284	0.0018455
335	apolipoprotein A-I	APOA1	1.2763	1.29e-39	2.59e-39
336	apolipoprotein A-II	APOA2	1.3075	5.58e-17	8.1e-17
338	apolipoprotein B (including Ag(x) antigen)	APOB	1.684	3.27e-36	6.22e-36
10930	apolipoprotein B mRNA editing enzyme, catalytic polypeptide-like 2	APOBEC2	-0.5722	1.3e-06	1.58e-06
200315	apolipoprotein B mRNA editing enzyme, catalytic polypeptide-like 3A	APOBEC3A	1.3611	1.39e-17	2.04e-17
9582	apolipoprotein B mRNA editing enzyme, catalytic polypeptide-like 3B	APOBEC3B	-3.7698	7.28e-96	3.49e-95
27350	apolipoprotein B mRNA editing enzyme, catalytic polypeptide-like 3C	APOBEC3C	-2.2337	3.93e-90	1.7e-89
200316	apolipoprotein B mRNA editing enzyme, catalytic polypeptide-like 3F	APOBEC3F	-1.2007	7.19e-35	1.34e-34
60489	apolipoprotein B mRNA editing enzyme, catalytic polypeptide-like 3G	APOBEC3G	-1.2992	1.04e-36	2e-36
164668	apolipoprotein B mRNA editing enzyme, catalytic polypeptide-like 3H	APOBEC3H	-1.2017	1.85e-26	3.06e-26
55911	apolipoprotein B receptor	APOBR	-2.1176	4.44e-95	2.1e-94
341	apolipoprotein C-I	APOC1	-3.2754	1.96e-130	1.9e-129
344	apolipoprotein C-II	APOC2	-2.1096	5.16e-51	1.23e-50
345	apolipoprotein C-III	APOC3	2.0021	1.21e-26	2.01e-26
346	apolipoprotein C-IV	APOC4	1.953	3.21e-45	6.96e-45
347	apolipoprotein D	APOD	0.32716	7.99e-05	9.35e-05
348	apolipoprotein E	APOE	-1.7253	1.79e-60	4.83e-60
8542	apolipoprotein L, 1	APOL1	-0.26371	0.0042054	0.0047036
23780	apolipoprotein L, 2	APOL2	0.62421	3.6e-26	5.94e-26
80832	apolipoprotein L, 4	APOL4	-2.0026	1.18e-24	1.9e-24
80831	apolipoprotein L, 5	APOL5	1.3312	8.5e-20	1.28e-19
80830	apolipoprotein L, 6	APOL6	-1.304	1.23e-41	2.53e-41
55937	apolipoprotein M	APOM	-1.2935	1.58e-74	5.32e-74
79135	apolipoprotein O	APOO	0.60748	5.92e-61	1.61e-60
139322	apolipoprotein O-like	APOOL	-4.2959	5.63e-282	6.1e-280
84334	apoptogenic 1	APOPT1	0.71519	2.9e-85	1.16e-84
351	amyloid beta (A4) precursor protein	APP	-0.20955	0.00016626	0.00019328
26060	adaptor protein, phosphotyrosine interaction, PH domain and leucine zipper containing 1	APPL1	-0.56312	3.74e-62	1.03e-61
55198	adaptor protein, phosphotyrosine interaction, PH domain and leucine zipper containing 2	APPL2	-0.75459	6.56e-45	1.42e-44
353	adenine phosphoribosyltransferase	APRT	-0.82905	1.07e-84	4.24e-84
358	aquaporin 1 (Colton blood group)	AQP1	-2.3807	2.24e-43	4.72e-43
282679	aquaporin 11	AQP11	0.62361	4.81e-48	1.09e-47
653437	aquaporin 12B	AQP12B	2.6333	1.45e-79	5.25e-79
360	aquaporin 3 (Gill blood group)	AQP3	0.28789	0.0049892	0.0055701
361	aquaporin 4	AQP4	-0.64059	6.6e-09	8.4e-09
362	aquaporin 5	AQP5	2.1523	4.04e-35	7.58e-35
363	aquaporin 6, kidney specific	AQP6	-2.6861	2.34e-109	1.46e-108
364	aquaporin 7	AQP7	1.9746	1.81e-54	4.49e-54
343	aquaporin 8	AQP8	2.226	9.6e-89	4.06e-88
366	aquaporin 9	AQP9	1.8824	1.28e-35	2.42e-35
9716	aquarius homolog (mouse)	AQR	-1.4261	9.93e-183	3.16e-181
367	androgen receptor	AR	-1.7831	1.17e-63	3.3e-63
369	v-raf murine sarcoma 3611 viral oncogene homolog	ARAF	-0.94039	1.26e-88	5.3e-88
116985	ArfGAP with RhoGAP domain, ankyrin repeat and PH domain 1	ARAP1	-0.73845	6.5e-66	1.9e-65
116984	ArfGAP with RhoGAP domain, ankyrin repeat and PH domain 2	ARAP2	0.32106	3.69e-07	4.54e-07
64411	ArfGAP with RhoGAP domain, ankyrin repeat and PH domain 3	ARAP3	0.34723	1.48e-05	1.77e-05
23237	activity-regulated cytoskeleton-associated protein	ARC	0.41254	0.00037998	0.0004379
377	ADP-ribosylation factor 3	ARF3	1.0277	3.74e-105	2.14e-104
378	ADP-ribosylation factor 4	ARF4	-0.82701	1.68e-91	7.42e-91
381	ADP-ribosylation factor 5	ARF5	-0.086429	0.019041	0.02086
382	ADP-ribosylation factor 6	ARF6	-1.7849	4.17e-232	2.77e-230
26286	ADP-ribosylation factor GTPase activating protein 3	ARFGAP3	-0.55342	1.31e-56	3.34e-56
10564	ADP-ribosylation factor guanine nucleotide-exchange factor 2 (brefeldin A-inhibited)	ARFGEF2	0.50054	2.47e-26	4.09e-26
27236	ADP-ribosylation factor interacting protein 1	ARFIP1	-0.88715	4.32e-96	2.08e-95
383	arginase, liver	ARG1	1.7257	2.74e-69	8.48e-69
384	arginase, type II	ARG2	0.38444	2.95e-08	3.71e-08
55082	arginine and glutamate rich 1	ARGLU1	0.9175	2.26e-78	8.07e-78
392	Rho GTPase activating protein 1	ARHGAP1	-0.44502	1.49e-32	2.69e-32
9824	Rho GTPase activating protein 11A	ARHGAP11A	-1.5977	1.36e-67	4.1e-67
89839	Rho GTPase activating protein 11B	ARHGAP11B	-1.2192	1.68e-29	2.91e-29
94134	Rho GTPase activating protein 12	ARHGAP12	-0.83721	2.45e-60	6.6e-60
55843	Rho GTPase activating protein 15	ARHGAP15	-1.7373	1.73e-69	5.37e-69
55114	Rho GTPase activating protein 17	ARHGAP17	-1.5935	3.62e-166	8.29e-165
93663	Rho GTPase activating protein 18	ARHGAP18	-1.1845	3.29e-56	8.35e-56
84986	Rho GTPase activating protein 19	ARHGAP19	-0.7244	1.1e-34	2.06e-34
57569	Rho GTPase activating protein 20	ARHGAP20	1.4271	8.92e-52	2.14e-51
57584	Rho GTPase activating protein 21	ARHGAP21	0.96673	3.52e-86	1.42e-85
83478	Rho GTPase activating protein 24	ARHGAP24	0.62228	3.26e-23	5.16e-23
9938	Rho GTPase activating protein 25	ARHGAP25	-0.84937	1.05e-36	2.01e-36
23092	Rho GTPase activating protein 26	ARHGAP26	1.4917	1.16e-100	6.09e-100
201176	Rho GTPase activating protein 27	ARHGAP27	0.32316	8.11e-11	1.07e-10
9411	Rho GTPase activating protein 29	ARHGAP29	1.0028	6.21e-41	1.26e-40
257106	Rho GTPase activating protein 30	ARHGAP30	-2.0781	3.01e-97	1.48e-96
57514	Rho GTPase activating protein 31	ARHGAP31	-1.5727	3.6e-83	1.38e-82
9743	Rho GTPase activating protein 32	ARHGAP32	1.0765	2.04e-65	5.93e-65
115703	Rho GTPase activating protein 33	ARHGAP33	1.0748	5.21e-86	2.1e-85
2909	Rho GTPase activating protein 35	ARHGAP35	0.72024	1.1e-57	2.84e-57
158763	Rho GTPase activating protein 36	ARHGAP36	-0.60946	5.12e-06	6.16e-06
80728	Rho GTPase activating protein 39	ARHGAP39	0.90095	4.01e-67	1.2e-66
393	Rho GTPase activating protein 4	ARHGAP4	-0.4778	7.44e-14	1.03e-13
343578	Rho GTPase activating protein 40	ARHGAP40	0.37806	0.0009717	0.001108
143872	Rho GTPase activating protein 42	ARHGAP42	-1.1438	3.53e-50	8.29e-50
9912	Rho GTPase activating protein 44	ARHGAP44	2.9797	3.45e-125	2.99e-124
394	Rho GTPase activating protein 5	ARHGAP5	0.35438	5.55e-11	7.33e-11
395	Rho GTPase activating protein 6	ARHGAP6	-0.55488	6.95e-13	9.47e-13
23779	Rho GTPase activating protein 8	ARHGAP8	4.2162	1.42e-194	5.68e-193
64333	Rho GTPase activating protein 9	ARHGAP9	-0.14179	0.038716	0.041942
396	Rho GDP dissociation inhibitor (GDI) alpha	ARHGDIA	-0.5992	4.3e-63	1.2e-62
397	Rho GDP dissociation inhibitor (GDI) beta	ARHGDIB	-1.7492	8.07e-94	3.72e-93
398	Rho GDP dissociation inhibitor (GDI) gamma	ARHGDIG	4.002	2.03e-156	3.65e-155
9138	Rho guanine nucleotide exchange factor (GEF) 1	ARHGEF1	-0.14921	0.005084	0.0056741
9639	Rho guanine nucleotide exchange factor (GEF) 10	ARHGEF10	0.35802	4.81e-12	6.47e-12
55160	Rho guanine nucleotide exchange factor (GEF) 10-like	ARHGEF10L	-0.67117	1.14e-41	2.35e-41
9826	Rho guanine nucleotide exchange factor (GEF) 11	ARHGEF11	0.73543	2.02e-50	4.76e-50
23365	Rho guanine nucleotide exchange factor (GEF) 12	ARHGEF12	0.37959	1.62e-22	2.53e-22
22899	Rho guanine nucleotide exchange factor (GEF) 15	ARHGEF15	0.60104	3.14e-17	4.57e-17
27237	Rho guanine nucleotide exchange factor (GEF) 16	ARHGEF16	1.8226	3.94e-95	1.86e-94
9828	Rho guanine nucleotide exchange factor (GEF) 17	ARHGEF17	0.64244	4.92e-37	9.47e-37
23370	Rho/Rac guanine nucleotide exchange factor (GEF) 18	ARHGEF18	2.7281	0	0
9181	Rho/Rac guanine nucleotide exchange factor (GEF) 2	ARHGEF2	-0.15753	0.00038865	0.00044774
115557	Rho guanine nucleotide exchange factor (GEF) 25	ARHGEF25	1.129	1.44e-66	4.28e-66
26084	Rho guanine nucleotide exchange factor (GEF) 26	ARHGEF26	-0.87793	1.69e-27	2.84e-27
50650	Rho guanine nucleotide exchange factor (GEF) 3	ARHGEF3	0.39332	2.8e-09	3.58e-09
100271715	Rho guanine nucleotide exchange factor (GEF) 33	ARHGEF33	2.2875	5.98e-192	2.3e-190
389337	Rho guanine nucleotide exchange factor (GEF) 37	ARHGEF37	0.54627	1.14e-12	1.54e-12
54848	Rho guanine nucleotide exchange factor (GEF) 38	ARHGEF38	-2.8709	3.79e-120	2.91e-119
50649	Rho guanine nucleotide exchange factor (GEF) 4	ARHGEF4	1.504	7.85e-109	4.84e-108
55701	Rho guanine nucleotide exchange factor (GEF) 40	ARHGEF40	-1.3777	2.81e-92	1.26e-91
7984	Rho guanine nucleotide exchange factor (GEF) 5	ARHGEF5	0.42886	2.67e-05	3.16e-05
9459	Rac/Cdc42 guanine nucleotide exchange factor (GEF) 6	ARHGEF6	-1.5727	1.42e-120	1.11e-119
8874	Rho guanine nucleotide exchange factor (GEF) 7	ARHGEF7	0.39829	3.08e-19	4.61e-19
23229	Cdc42 guanine nucleotide exchange factor (GEF) 9	ARHGEF9	1.4781	7.64e-98	3.81e-97
196528	AT rich interactive domain 2 (ARID, RFX-like)	ARID2	-0.90251	1.88e-94	8.78e-94
1820	AT rich interactive domain 3A (BRIGHT-like)	ARID3A	-0.17887	2.65e-05	3.14e-05
10620	AT rich interactive domain 3B (BRIGHT-like)	ARID3B	0.27836	4.81e-10	6.25e-10
138715	AT rich interactive domain 3C (BRIGHT-like)	ARID3C	1.2059	5.07e-31	8.98e-31
84159	AT rich interactive domain 5B (MRF1-like)	ARID5B	-0.32934	9.07e-12	1.21e-11
10425	ariadne homolog 2 (Drosophila)	ARIH2	-0.41057	3.49e-40	7.02e-40
400	ADP-ribosylation factor-like 1	ARL1	0.29438	1.84e-18	2.72e-18
285598	ADP-ribosylation factor-like 10	ARL10	-0.17914	1.69e-05	2.01e-05
115761	ADP-ribosylation factor-like 11	ARL11	-3.0213	1.23e-86	5.03e-86
392509	ADP-ribosylation factor-like 13A	ARL13A	-1.9657	1.63e-62	4.51e-62
200894	ADP-ribosylation factor-like 13B	ARL13B	-0.84382	7.8e-72	2.52e-71
54622	ADP-ribosylation factor-like 15	ARL15	0.5175	8.3e-23	1.31e-22
51326	ADP-ribosylation factor-like 17A	ARL17A	0.52042	5.96e-15	8.37e-15
100506084	ADP-ribosylation factor-like 17B	ARL17B	0.40328	6.22e-05	7.29e-05
402	ADP-ribosylation factor-like 2	ARL2	1.103	7.03e-117	5.06e-116
23568	ADP-ribosylation factor-like 2 binding protein	ARL2BP	2.3749	5.26e-231	3.44e-229
10124	ADP-ribosylation factor-like 4A	ARL4A	-0.28282	3.67e-06	4.43e-06
10123	ADP-ribosylation factor-like 4C	ARL4C	0.46324	1.57e-07	1.94e-07
379	ADP-ribosylation factor-like 4D	ARL4D	0.74765	1.3e-22	2.05e-22
26225	ADP-ribosylation factor-like 5A	ARL5A	-0.63764	4.41e-59	1.17e-58
221079	ADP-ribosylation factor-like 5B	ARL5B	-0.29152	1.93e-09	2.48e-09
390790	ADP-ribosylation factor-like 5C	ARL5C	1.251	1.5e-27	2.53e-27
84100	ADP-ribosylation factor-like 6	ARL6	0.9319	1.08e-65	3.14e-65
23204	ADP-ribosylation factor-like 6 interacting protein 1	ARL6IP1	0.64613	1.94e-48	4.44e-48
51329	ADP-ribosylation-like factor 6 interacting protein 4	ARL6IP4	5.6252	0	0
151188	ADP-ribosylation-like factor 6 interacting protein 6	ARL6IP6	-1.0197	1.49e-70	4.71e-70
55207	ADP-ribosylation factor-like 8B	ARL8B	0.3918	3.14e-23	4.98e-23
132946	ADP-ribosylation factor-like 9	ARL9	2.2604	4.01e-71	1.28e-70
84071	armadillo repeat containing 2	ARMC2	1.129	3.23e-95	1.53e-94
219681	armadillo repeat containing 3	ARMC3	1.6647	2.52e-34	4.67e-34
55130	armadillo repeat containing 4	ARMC4	0.34234	0.00073372	0.00083886
80210	armadillo repeat containing 9	ARMC9	0.52614	7.15e-26	1.17e-25
9823	armadillo repeat containing, X-linked 2	ARMCX2	0.60563	1.58e-42	3.3e-42
100131755	armadillo repeat containing, X-linked 4	ARMCX4	0.48839	1.45e-20	2.22e-20
54470	armadillo repeat containing, X-linked 6	ARMCX6	-1.1568	1.04e-132	1.06e-131
387715	age-related maculopathy susceptibility 2	ARMS2	0.47889	3.9e-05	4.61e-05
9915	aryl-hydrocarbon receptor nuclear translocator 2	ARNT2	0.80533	2.03e-58	5.33e-58
406	aryl hydrocarbon receptor nuclear translocator-like	ARNTL	0.96775	9.71e-70	3.03e-69
10095	actin related protein 2/3 complex, subunit 1B, 41kDa	ARPC1B	-1.9498	2.63e-105	1.51e-104
10092	actin related protein 2/3 complex, subunit 5, 16kDa	ARPC5	-0.83322	3.64e-72	1.18e-71
81873	actin related protein 2/3 complex, subunit 5-like	ARPC5L	1.2638	1.54e-145	2.12e-144
84517	actin related protein M1	ARPM1	1.5456	1.45e-55	3.64e-55
10776	cAMP-regulated phosphoprotein, 19kDa	ARPP19	0.82855	1.61e-66	4.76e-66
10777	cAMP-regulated phosphoprotein, 21kDa	ARPP21	2.1392	1.42e-76	4.93e-76
407	arrestin 3, retinal (X-arrestin)	ARR3	-2.5412	6.14e-84	2.39e-83
408	arrestin, beta 1	ARRB1	1.5887	9.91e-88	4.11e-87
92714	arrestin domain containing 1	ARRDC1	0.62782	2.69e-59	7.14e-59
27106	arrestin domain containing 2	ARRDC2	0.21203	0.0048423	0.0054083
57561	arrestin domain containing 3	ARRDC3	-0.85006	5.37e-29	9.25e-29
91947	arrestin domain containing 4	ARRDC4	-0.77445	1.99e-30	3.49e-30
645432	arrestin domain containing 5	ARRDC5	-1.2022	9.19e-20	1.38e-19
410	arylsulfatase A	ARSA	0.43625	2.7e-22	4.22e-22
411	arylsulfatase B	ARSB	-0.92169	6.86e-110	4.32e-109
414	arylsulfatase D	ARSD	-0.35132	7.67e-06	9.19e-06
415	arylsulfatase E (chondrodysplasia punctata 1)	ARSE	-0.28358	0.00019585	0.00022711
416	arylsulfatase F	ARSF	1.2575	3.66e-18	5.4e-18
22901	arylsulfatase G	ARSG	-0.46658	1.98e-22	3.11e-22
79642	arylsulfatase family, member J	ARSJ	-0.58838	1.09e-07	1.35e-07
153642	arylsulfatase family, member K	ARSK	-0.28271	1.44e-08	1.82e-08
419	ADP-ribosyltransferase 3	ART3	2.1642	1.2e-70	3.8e-70
116969	ADP-ribosyltransferase 5	ART5	0.4331	0.0012557	0.0014274
9048	artemin	ARTN	0.55473	5.48e-11	7.24e-11
421	armadillo repeat gene deleted in velocardiofacial syndrome	ARVCF	-0.10244	0.033616	0.03651
170302	aristaless related homeobox	ARX	3.0251	1.03e-112	6.88e-112
427	N-acylsphingosine amidohydrolase (acid ceramidase) 1	ASAH1	-1.1104	5.9e-128	5.4e-127
56624	N-acylsphingosine amidohydrolase (non-lysosomal ceramidase) 2	ASAH2	-0.33038	0.015484	0.017007
653308	N-acylsphingosine amidohydrolase (non-lysosomal ceramidase) 2B	ASAH2B	0.61756	1.49e-26	2.48e-26
50807	ArfGAP with SH3 domain, ankyrin repeat and PH domain 1	ASAP1	-0.30837	6.61e-17	9.58e-17
8853	ArfGAP with SH3 domain, ankyrin repeat and PH domain 2	ASAP2	-0.17952	0.0036889	0.0041317
55616	ArfGAP with SH3 domain, ankyrin repeat and PH domain 3	ASAP3	-0.572	8.29e-18	1.22e-17
51665	ankyrin repeat and SOCS box containing 1	ASB1	0.31232	1.48e-15	2.1e-15
142686	ankyrin repeat and SOCS box containing 14	ASB14	-0.58779	4.23e-34	7.8e-34
92591	ankyrin repeat and SOCS box containing 16	ASB16	-0.66319	1.64e-24	2.65e-24
401036	ankyrin repeat and SOCS box containing 18	ASB18	2.6352	2.56e-73	8.49e-73
51676	ankyrin repeat and SOCS box containing 2	ASB2	3.7866	2.82e-144	3.79e-143
51130	ankyrin repeat and SOCS box containing 3	ASB3	1.9806	4.24e-191	1.59e-189
51666	ankyrin repeat and SOCS box containing 4	ASB4	1.7426	8.63e-52	2.07e-51
140458	ankyrin repeat and SOCS box containing 5	ASB5	1.3607	8.44e-28	1.43e-27
140460	ankyrin repeat and SOCS box containing 7	ASB7	-0.40548	1.22e-42	2.54e-42
140462	ankyrin repeat and SOCS box containing 9	ASB9	-0.92593	2.08e-18	3.07e-18
51008	activating signal cointegrator 1 complex subunit 1	ASCC1	-0.83215	1.13e-77	4e-77
84164	activating signal cointegrator 1 complex subunit 2	ASCC2	-0.88039	2.05e-81	7.63e-81
10973	activating signal cointegrator 1 complex subunit 3	ASCC3	-1.3277	1.07e-144	1.45e-143
429	achaete-scute complex homolog 1 (Drosophila)	ASCL1	-1.4042	8.05e-44	1.71e-43
430	achaete-scute complex homolog 2 (Drosophila)	ASCL2	0.2309	0.019528	0.021381
121549	achaete-scute complex homolog 4 (Drosophila)	ASCL4	0.4156	0.003088	0.0034676
25842	ASF1 anti-silencing function 1 homolog A (S. cerevisiae)	ASF1A	-0.55838	1.44e-29	2.5e-29
55723	ASF1 anti-silencing function 1 homolog B (S. cerevisiae)	ASF1B	-4.6891	4.07e-155	7.1e-154
432	asialoglycoprotein receptor 1	ASGR1	0.77171	7.28e-32	1.31e-31
433	asialoglycoprotein receptor 2	ASGR2	1.583	8.79e-52	2.11e-51
55870	ash1 (absent, small, or homeotic)-like (Drosophila)	ASH1L	0.24985	1.85e-09	2.37e-09
41	acid-sensing (proton-gated) ion channel 1	ASIC1	-0.58404	2.78e-19	4.16e-19
40	acid-sensing (proton-gated) ion channel 2	ASIC2	3.9569	3.52e-124	2.96e-123
9311	acid-sensing (proton-gated) ion channel 3	ASIC3	1.2912	5.23e-58	1.36e-57
55515	acid-sensing (proton-gated) ion channel family member 4	ASIC4	-1.5564	7.54e-36	1.43e-35
434	agouti signaling protein	ASIP	-3.4177	3.31e-98	1.66e-97
435	argininosuccinate lyase	ASL	0.43329	1.63e-22	2.55e-22
438	acetylserotonin O-methyltransferase	ASMT	1.3244	2.52e-27	4.24e-27
8623	acetylserotonin O-methyltransferase-like	ASMTL	-0.42725	1.52e-27	2.56e-27
440	asparagine synthetase (glutamine-hydrolyzing)	ASNS	1.0922	8.97e-83	3.42e-82
443	aspartoacylase	ASPA	1.3887	5.16e-30	9e-30
554235	aspartate dehydrogenase domain containing	ASPDH	3.0395	1.82e-145	2.5e-144
374569	asparaginase homolog (S. cerevisiae)	ASPG	2.2126	2.89e-57	7.45e-57
253982	aspartate beta-hydroxylase domain containing 1	ASPHD1	2.2739	3.73e-118	2.76e-117
57168	aspartate beta-hydroxylase domain containing 2	ASPHD2	0.61369	3.14e-21	4.82e-21
259266	asp (abnormal spindle) homolog, microcephaly associated (Drosophila)	ASPM	-2.1533	3.39e-60	9.11e-60
54829	asporin	ASPN	-0.38902	0.0010679	0.001216
151516	aspartic peptidase, retroviral-like 1	ASPRV1	0.69599	1.13e-38	2.23e-38
80150	asparaginase like 1	ASRGL1	0.99192	2.75e-49	6.35e-49
445	argininosuccinate synthase 1	ASS1	2.483	4.07e-124	3.42e-123
28990	asteroid homolog 1 (Drosophila)	ASTE1	-0.67553	7.58e-78	2.69e-77
431705	astacin-like metallo-endopeptidase (M12 family)	ASTL	2.9525	3.44e-95	1.63e-94
23245	astrotactin 2	ASTN2	-1.2859	1.25e-88	5.27e-88
55252	additional sex combs like 2 (Drosophila)	ASXL2	-0.55524	6.3e-41	1.28e-40
80816	additional sex combs like 3 (Drosophila)	ASXL3	0.75774	2.53e-20	3.84e-20
84896	ATPase family, AAA domain containing 1	ATAD1	0.18512	4.7e-05	5.53e-05
29028	ATPase family, AAA domain containing 2	ATAD2	-0.73945	1.16e-49	2.71e-49
54454	ATPase family, AAA domain containing 2B	ATAD2B	-0.41697	9.93e-23	1.56e-22
83858	ATPase family, AAA domain containing 3B	ATAD3B	0.63727	2.8e-26	4.64e-26
219293	ATPase family, AAA domain containing 3C	ATAD3C	1.8424	2.22e-64	6.36e-64
79915	ATPase family, AAA domain containing 5	ATAD5	-0.94674	1.31e-56	3.34e-56
85300	ataxia, cerebellar, Cayman type	ATCAY	1.5137	1.81e-35	3.42e-35
466	activating transcription factor 1	ATF1	-0.39184	2.09e-25	3.42e-25
1386	activating transcription factor 2	ATF2	0.18091	1.69e-06	2.05e-06
467	activating transcription factor 3	ATF3	-0.45801	0.00026572	0.00030725
22809	activating transcription factor 5	ATF5	-0.36977	1.15e-12	1.56e-12
22926	activating transcription factor 6	ATF6	-0.80178	1.05e-124	8.96e-124
11016	activating transcription factor 7	ATF7	-0.53115	9.7e-35	1.81e-34
55729	activating transcription factor 7 interacting protein	ATF7IP	-2.7391	1.7e-280	1.8e-278
80063	activating transcription factor 7 interacting protein 2	ATF7IP2	2.5134	1.49e-185	5.08e-184
55054	ATG16 autophagy related 16-like 1 (S. cerevisiae)	ATG16L1	0.81931	2e-64	5.72e-64
89849	ATG16 autophagy related 16-like 2 (S. cerevisiae)	ATG16L2	0.48441	4.39e-22	6.83e-22
55102	ATG2 autophagy related 2 homolog B (S. cerevisiae)	ATG2B	0.7726	1.85e-72	6.05e-72
84971	ATG4 autophagy related 4 homolog D (S. cerevisiae)	ATG4D	0.36264	8.64e-24	1.38e-23
9474	ATG5 autophagy related 5 homolog (S. cerevisiae)	ATG5	0.19992	1.29e-09	1.66e-09
79065	ATG9 autophagy related 9 homolog A (S. cerevisiae)	ATG9A	0.23059	6.41e-13	8.73e-13
51062	atlastin GTPase 1	ATL1	1.1134	6.77e-36	1.28e-35
64225	atlastin GTPase 2	ATL2	0.58074	3.69e-57	9.51e-57
25923	atlastin GTPase 3	ATL3	-0.88388	4.01e-57	1.03e-56
472	ataxia telangiectasia mutated	ATM	-0.58124	5.21e-37	1e-36
1822	atrophin 1	ATN1	0.35936	1.72e-20	2.62e-20
220202	atonal homolog 7 (Drosophila)	ATOH7	3.0439	1.64e-127	1.49e-126
84913	atonal homolog 8 (Drosophila)	ATOH8	-1.6557	4.65e-44	9.92e-44
57194	ATPase, class V, type 10A	ATP10A	0.52695	7.66e-11	1.01e-10
23120	ATPase, class V, type 10B	ATP10B	0.31028	0.0024649	0.0027755
57205	ATPase, class V, type 10D	ATP10D	-0.74088	9.39e-42	1.94e-41
23250	ATPase, class VI, type 11A	ATP11A	-0.78507	1.58e-46	3.51e-46
23200	ATPase, class VI, type 11B	ATP11B	-0.33494	5.09e-17	7.39e-17
286410	ATPase, class VI, type 11C	ATP11C	-1.0061	1.21e-60	3.27e-60
479	ATPase, H+/K+ transporting, nongastric, alpha polypeptide	ATP12A	1.4061	8.45e-17	1.22e-16
57130	ATPase type 13A1	ATP13A1	-0.29241	9.16e-15	1.28e-14
23400	ATPase type 13A2	ATP13A2	1.3834	9.88e-118	7.22e-117
344905	ATPase type 13A5	ATP13A5	-0.39772	1.19e-05	1.42e-05
476	ATPase, Na+/K+ transporting, alpha 1 polypeptide	ATP1A1	0.60328	2.56e-16	3.68e-16
477	ATPase, Na+/K+ transporting, alpha 2 polypeptide	ATP1A2	1.3836	1.88e-34	3.49e-34
478	ATPase, Na+/K+ transporting, alpha 3 polypeptide	ATP1A3	1.9659	5.87e-60	1.57e-59
480	ATPase, Na+/K+ transporting, alpha 4 polypeptide	ATP1A4	0.21851	0.0121	0.013339
481	ATPase, Na+/K+ transporting, beta 1 polypeptide	ATP1B1	1.9015	2e-66	5.91e-66
482	ATPase, Na+/K+ transporting, beta 2 polypeptide	ATP1B2	-0.20512	0.010551	0.011657
483	ATPase, Na+/K+ transporting, beta 3 polypeptide	ATP1B3	0.14806	4.28e-05	5.04e-05
487	ATPase, Ca++ transporting, cardiac muscle, fast twitch 1	ATP2A1	0.67285	5.65e-19	8.42e-19
488	ATPase, Ca++ transporting, cardiac muscle, slow twitch 2	ATP2A2	0.24993	1.41e-07	1.74e-07
489	ATPase, Ca++ transporting, ubiquitous	ATP2A3	0.69235	8.36e-19	1.24e-18
490	ATPase, Ca++ transporting, plasma membrane 1	ATP2B1	1.8675	1.34e-97	6.63e-97
491	ATPase, Ca++ transporting, plasma membrane 2	ATP2B2	2.6288	1.06e-112	7.02e-112
492	ATPase, Ca++ transporting, plasma membrane 3	ATP2B3	3.9145	2.43e-109	1.51e-108
493	ATPase, Ca++ transporting, plasma membrane 4	ATP2B4	-0.18869	4.03e-06	4.86e-06
9914	ATPase, Ca++ transporting, type 2C, member 2	ATP2C2	1.8622	5.53e-78	1.96e-77
495	ATPase, H+/K+ exchanging, alpha polypeptide	ATP4A	4.9591	1.31e-152	2.15e-151
4508	ATP synthase F0 subunit 6	ATP6	2.6763	7.53e-157	1.37e-155
537	ATPase, H+ transporting, lysosomal accessory protein 1	ATP6AP1	0.21419	6.05e-08	7.56e-08
92270	ATPase, H+ transporting, lysosomal accessory protein 1-like	ATP6AP1L	0.56224	1.43e-29	2.47e-29
535	ATPase, H+ transporting, lysosomal V0 subunit a1	ATP6V0A1	0.7373	2.96e-55	7.43e-55
23545	ATPase, H+ transporting, lysosomal V0 subunit a2	ATP6V0A2	-0.53572	5.12e-55	1.28e-54
50617	ATPase, H+ transporting, lysosomal V0 subunit a4	ATP6V0A4	1.8526	1.64e-41	3.36e-41
533	ATPase, H+ transporting, lysosomal 21kDa, V0 subunit b	ATP6V0B	0.29743	1.07e-12	1.45e-12
527	ATPase, H+ transporting, lysosomal 16kDa, V0 subunit c	ATP6V0C	3.1965	6.59e-292	7.98e-290
9114	ATPase, H+ transporting, lysosomal 38kDa, V0 subunit d1	ATP6V0D1	0.35028	3.25e-15	4.59e-15
8992	ATPase, H+ transporting, lysosomal 9kDa, V0 subunit e1	ATP6V0E1	-1.3853	7.53e-94	3.48e-93
155066	ATPase, H+ transporting V0 subunit e2	ATP6V0E2	0.092323	0.038227	0.041422
523	ATPase, H+ transporting, lysosomal 70kDa, V1 subunit A	ATP6V1A	0.81604	1.3e-33	2.39e-33
525	ATPase, H+ transporting, lysosomal 56/58kDa, V1 subunit B1	ATP6V1B1	-2.8995	6.7e-117	4.83e-116
526	ATPase, H+ transporting, lysosomal 56/58kDa, V1 subunit B2	ATP6V1B2	1.0807	2.83e-58	7.39e-58
528	ATPase, H+ transporting, lysosomal 42kDa, V1 subunit C1	ATP6V1C1	1.039	1.13e-66	3.34e-66
245973	ATPase, H+ transporting, lysosomal 42kDa, V1 subunit C2	ATP6V1C2	0.91021	7.7e-44	1.63e-43
51382	ATPase, H+ transporting, lysosomal 34kDa, V1 subunit D	ATP6V1D	0.80787	2.68e-67	8.02e-67
529	ATPase, H+ transporting, lysosomal 31kDa, V1 subunit E1	ATP6V1E1	1.198	2.59e-101	1.38e-100
9296	ATPase, H+ transporting, lysosomal 14kDa, V1 subunit F	ATP6V1F	0.23966	3.54e-10	4.61e-10
534	ATPase, H+ transporting, lysosomal 13kDa, V1 subunit G2	ATP6V1G2	2.1935	4.87e-97	2.38e-96
51606	ATPase, H+ transporting, lysosomal 50/57kDa, V1 subunit H	ATP6V1H	1.262	6.23e-102	3.36e-101
538	ATPase, Cu++ transporting, alpha polypeptide	ATP7A	-1.0202	2.67e-98	1.34e-97
540	ATPase, Cu++ transporting, beta polypeptide	ATP7B	0.99587	2.93e-64	8.37e-64
4509	ATP synthase F0 subunit 8	ATP8	2.9092	3.77e-162	7.73e-161
10396	ATPase, aminophospholipid transporter (APLT), class I, type 8A, member 1	ATP8A1	1.2665	7.62e-44	1.62e-43
51761	ATPase, aminophospholipid transporter, class I, type 8A, member 2	ATP8A2	3.2754	2.68e-91	1.18e-90
5205	ATPase, aminophospholipid transporter, class I, type 8B, member 1	ATP8B1	1.1858	6.34e-53	1.55e-52
57198	ATPase, class I, type 8B, member 2	ATP8B2	0.57571	6.63e-53	1.62e-52
148229	ATPase, aminophospholipid transporter, class I, type 8B, member 3	ATP8B3	-0.52529	1.03e-15	1.46e-15
79895	ATPase, class I, type 8B, member 4	ATP8B4	-1.0806	5.23e-39	1.04e-38
10079	ATPase, class II, type 9A	ATP9A	0.34892	3.41e-08	4.29e-08
64756	ATP synthase mitochondrial F1 complex assembly factor 1	ATPAF1	0.98724	6.12e-112	3.99e-111
91647	ATP synthase mitochondrial F1 complex assembly factor 2	ATPAF2	-0.51408	4.03e-69	1.25e-68
89978	ATP binding domain 4	ATPBD4	-0.91091	1.86e-64	5.34e-64
545	ataxia telangiectasia and Rad3 related	ATR	0.23848	4.48e-11	5.93e-11
84126	ATR interacting protein	ATRIP	5.129	0	0
8455	attractin	ATRN	-0.12871	0.0017932	0.002028
26033	attractin-like 1	ATRNL1	2.0709	8.86e-66	2.59e-65
6310	ataxin 1	ATXN1	0.89343	2.4e-84	9.41e-84
342371	ataxin 1-like	ATXN1L	-0.313	6.38e-20	9.63e-20
11273	ataxin 2-like	ATXN2L	0.14652	0.00037161	0.00042837
4287	ataxin 3	ATXN3	-0.70134	4.38e-75	1.48e-74
222255	ataxin 7-like 1	ATXN7L1	0.11038	0.0058791	0.0065491
127002	ataxin 7-like 2	ATXN7L2	0.53841	4.53e-22	7.05e-22
56970	ataxin 7-like 3	ATXN7L3	1.8856	4.05e-185	1.37e-183
552889	ataxin 7-like 3B	ATXN7L3B	0.23329	2.09e-09	2.68e-09
549	AU RNA binding protein/enoyl-CoA hydratase	AUH	1.2704	1.11e-149	1.69e-148
550	ancient ubiquitous protein 1	AUP1	-0.51163	4.55e-51	1.08e-50
6790	aurora kinase A	AURKA	-1.4628	8.01e-72	2.59e-71
54998	aurora kinase A interacting protein 1	AURKAIP1	0.48386	1.29e-35	2.43e-35
9212	aurora kinase B	AURKB	-5.8227	1.48e-148	2.2e-147
6795	aurora kinase C	AURKC	0.33885	2.5e-05	2.96e-05
26053	autism susceptibility candidate 2	AUTS2	-0.18191	1.87e-05	2.23e-05
10677	advillin	AVIL	-1.1827	1.1e-66	3.26e-66
551	arginine vasopressin	AVP	2.1823	3.15e-41	6.45e-41
60370	arginine vasopressin-induced 1	AVPI1	1.6278	5.22e-126	4.58e-125
552	arginine vasopressin receptor 1A	AVPR1A	-2.8137	6.91e-84	2.69e-83
553	arginine vasopressin receptor 1B	AVPR1B	0.90875	1.84e-12	2.49e-12
554	arginine vasopressin receptor 2	AVPR2	1.0793	2.63e-21	4.04e-21
126859	axonemal dynein light chain domain containing 1	AXDND1	-0.35725	0.0026079	0.0029346
8313	axin 2	AXIN2	0.68315	1.47e-47	3.31e-47
558	AXL receptor tyrosine kinase	AXL	-0.26467	0.00053102	0.00060932
563	alpha-2-glycoprotein 1, zinc-binding	AZGP1	-0.85351	1.59e-11	2.11e-11
51582	antizyme inhibitor 1	AZIN1	-0.35602	5.41e-22	8.41e-22
566	azurocidin 1	AZU1	2.1214	2.18e-67	6.53e-67
567	beta-2-microglobulin	B2M	-1.6427	1.19e-83	4.6e-83
8706	beta-1,3-N-acetylgalactosaminyltransferase 1 (globoside blood group)	B3GALNT1	0.44472	1.23e-18	1.83e-18
8708	UDP-Gal:betaGlcNAc beta 1,3-galactosyltransferase, polypeptide 1	B3GALT1	1.3187	5.24e-68	1.59e-67
8707	UDP-Gal:betaGlcNAc beta 1,3-galactosyltransferase, polypeptide 2	B3GALT2	1.5973	1.98e-57	5.12e-57
8705	UDP-Gal:betaGlcNAc beta 1,3-galactosyltransferase, polypeptide 4	B3GALT4	0.19111	6.19e-05	7.26e-05
10317	UDP-Gal:betaGlcNAc beta 1,3-galactosyltransferase, polypeptide 5	B3GALT5	-0.48197	3.99e-13	5.46e-13
27087	beta-1,3-glucuronyltransferase 1 (glucuronosyltransferase P)	B3GAT1	1.4244	1.1e-94	5.17e-94
135152	beta-1,3-glucuronyltransferase 2 (glucuronosyltransferase S)	B3GAT2	-0.34278	0.00055706	0.00063899
10678	UDP-GlcNAc:betaGal beta-1,3-N-acetylglucosaminyltransferase 2	B3GNT2	0.25754	6.94e-09	8.84e-09
79369	UDP-GlcNAc:betaGal beta-1,3-N-acetylglucosaminyltransferase 4	B3GNT4	2.6913	5.8e-151	9.13e-150
84002	UDP-GlcNAc:betaGal beta-1,3-N-acetylglucosaminyltransferase 5	B3GNT5	-1.7041	3.84e-60	1.03e-59
93010	UDP-GlcNAc:betaGal beta-1,3-N-acetylglucosaminyltransferase 7	B3GNT7	1.5897	6.22e-51	1.48e-50
84752	UDP-GlcNAc:betaGal beta-1,3-N-acetylglucosaminyltransferase 9	B3GNT9	-1.0852	8.98e-53	2.19e-52
2583	beta-1,4-N-acetyl-galactosaminyl transferase 1	B4GALNT1	1.2396	1.03e-41	2.13e-41
283358	beta-1,4-N-acetyl-galactosaminyl transferase 3	B4GALNT3	2.6684	8.97e-130	8.54e-129
338707	beta-1,4-N-acetyl-galactosaminyl transferase 4	B4GALNT4	1.5595	2.2e-97	1.08e-96
2683	UDP-Gal:betaGlcNAc beta 1,4- galactosyltransferase, polypeptide 1	B4GALT1	-1.3614	1.95e-60	5.26e-60
8704	UDP-Gal:betaGlcNAc beta 1,4- galactosyltransferase, polypeptide 2	B4GALT2	0.62711	1.23e-45	2.68e-45
8702	UDP-Gal:betaGlcNAc beta 1,4- galactosyltransferase, polypeptide 4	B4GALT4	-0.67813	2.33e-64	6.66e-64
9334	UDP-Gal:betaGlcNAc beta 1,4- galactosyltransferase, polypeptide 5	B4GALT5	-0.74409	2.53e-49	5.84e-49
9331	UDP-Gal:betaGlcNAc beta 1,4- galactosyltransferase, polypeptide 6	B4GALT6	0.89976	2.06e-20	3.13e-20
374383	B7 homolog 6	B7H6	1.3114	1.01e-29	1.76e-29
27077	B9 protein domain 1	B9D1	0.47686	2.2e-27	3.71e-27
80776	B9 protein domain 2	B9D2	-0.10333	0.037518	0.040667
79870	brain and acute leukemia, cytoplasmic	BAALC	-0.36835	2.54e-12	3.43e-12
570	bile acid CoA: amino acid N-acyltransferase (glycine N-choloyltransferase)	BAAT	1.9404	1.88e-81	7.01e-81
29086	BRISC and BRCA1 A complex member 1	BABAM1	1.0917	2.06e-133	2.12e-132
23621	beta-site APP-cleaving enzyme 1	BACE1	-0.37244	4.31e-19	6.43e-19
25825	beta-site APP-cleaving enzyme 2	BACE2	-0.64494	2.21e-13	3.03e-13
571	BTB and CNC homology 1, basic leucine zipper transcription factor 1	BACH1	-1.3539	1.11e-108	6.83e-108
60468	BTB and CNC homology 1, basic leucine zipper transcription factor 2	BACH2	-0.37495	3.16e-13	4.33e-13
9532	BCL2-associated athanogene 2	BAG2	1.0816	1.5e-91	6.64e-91
9530	BCL2-associated athanogene 4	BAG4	1.071	3.64e-81	1.35e-80
10458	BAI1-associated protein 2	BAIAP2	1.0697	1.74e-83	6.7e-83
55971	BAI1-associated protein 2-like 1	BAIAP2L1	1.1199	9.25e-51	2.19e-50
80115	BAI1-associated protein 2-like 2	BAIAP2L2	2.3261	1.09e-147	1.58e-146
8938	BAI1-associated protein 3	BAIAP3	2.1556	8.01e-86	3.22e-85
578	BCL2-antagonist/killer 1	BAK1	-0.23481	7.33e-10	9.48e-10
25805	BMP and activin membrane-bound inhibitor homolog (Xenopus laevis)	BAMBI	-0.28044	8.76e-05	0.00010246
8815	barrier to autointegration factor 1	BANF1	-0.6225	3.38e-60	9.08e-60
55024	B-cell scaffold protein with ankyrin repeats 1	BANK1	1.444	6.8e-47	1.52e-46
54971	BTG3 associated nuclear protein	BANP	-0.11036	0.0022781	0.0025666
8314	BRCA1 associated protein-1 (ubiquitin carboxy-terminal hydrolase)	BAP1	1.1985	5.88e-142	7.5e-141
580	BRCA1 associated RING domain 1	BARD1	-1.8005	1.69e-115	1.18e-114
56751	BarH-like homeobox 1	BARHL1	-2.6541	9.41e-49	2.16e-48
343472	BarH-like homeobox 2	BARHL2	1.1254	8.44e-16	1.2e-15
8538	BARX homeobox 2	BARX2	1.3136	3.36e-27	5.64e-27
10409	brain abundant, membrane attached signal protein 1	BASP1	2.3692	2.23e-112	1.47e-111
10538	basic leucine zipper transcription factor, ATF-like	BATF	-1.7415	1.49e-25	2.44e-25
116071	basic leucine zipper transcription factor, ATF-like 2	BATF2	-1.0403	1.22e-26	2.03e-26
55509	basic leucine zipper transcription factor, ATF-like 3	BATF3	0.7683	3.22e-22	5.03e-22
581	BCL2-associated X protein	BAX	-1.3097	1.67e-140	2.06e-139
11177	bromodomain adjacent to zinc finger domain, 1A	BAZ1A	-1.4844	1.95e-82	7.41e-82
29994	bromodomain adjacent to zinc finger domain, 2B	BAZ2B	-0.2722	8.15e-07	9.95e-07
27113	BCL2 binding component 3	BBC3	0.35753	7e-13	9.53e-13
8424	butyrobetaine (gamma), 2-oxoglutarate dioxygenase (gamma-butyrobetaine hydroxylase) 1	BBOX1	-0.9247	1.35e-19	2.03e-19
582	Bardet-Biedl syndrome 1	BBS1	4.3755	0	0
79738	Bardet-Biedl syndrome 10	BBS10	-0.6894	1.76e-54	4.38e-54
166379	Bardet-Biedl syndrome 12	BBS12	0.27839	7.38e-09	9.39e-09
129880	Bardet-Biedl syndrome 5	BBS5	1.4285	1.64e-211	8.45e-210
55212	Bardet-Biedl syndrome 7	BBS7	0.84889	1.39e-61	3.81e-61
27241	Bardet-Biedl syndrome 9	BBS9	-0.56749	3e-70	9.44e-70
56987	bobby sox homolog (Drosophila)	BBX	-1.0253	1.09e-75	3.74e-75
4059	basal cell adhesion molecule (Lutheran blood group)	BCAM	0.31167	5.39e-06	6.48e-06
63827	brevican	BCAN	-3.0405	1.5e-124	1.27e-123
55973	B-cell receptor-associated protein 29	BCAP29	0.234	1.02e-09	1.31e-09
9564	breast cancer anti-estrogen resistance 1	BCAR1	-0.26784	2.93e-09	3.75e-09
8412	breast cancer anti-estrogen resistance 3	BCAR3	0.26722	5.92e-05	6.96e-05
8537	breast carcinoma amplified sequence 1	BCAS1	2.0089	4.48e-49	1.03e-48
10286	breast carcinoma amplified sequence 2	BCAS2	0.52712	1.23e-44	2.65e-44
54828	breast carcinoma amplified sequence 3	BCAS3	0.10682	0.0053526	0.0059709
55653	breast carcinoma amplified sequence 4	BCAS4	0.74588	1.76e-35	3.31e-35
586	branched chain amino-acid transaminase 1, cytosolic	BCAT1	0.42426	1.04e-05	1.25e-05
587	branched chain amino-acid transaminase 2, mitochondrial	BCAT2	0.54882	2.74e-21	4.22e-21
56647	BRCA2 and CDKN1A interacting protein	BCCIP	-0.38989	2.06e-22	3.23e-22
144233	BCDIN3 domain containing	BCDIN3D	-2.219	2.24e-282	2.47e-280
590	butyrylcholinesterase	BCHE	-3.126	1.81e-162	3.75e-161
593	branched chain keto acid dehydrogenase E1, alpha polypeptide	BCKDHA	3.2637	9.74919999999984e-311	0
594	branched chain keto acid dehydrogenase E1, beta polypeptide	BCKDHB	-0.24792	1.37e-06	1.66e-06
8915	B-cell CLL/lymphoma 10	BCL10	-0.65323	1.51e-52	3.66e-52
53335	B-cell CLL/lymphoma 11A (zinc finger protein)	BCL11A	3.8156	2.61e-146	3.65e-145
64919	B-cell CLL/lymphoma 11B (zinc finger protein)	BCL11B	2.0179	9.4e-79	3.37e-78
597	BCL2-related protein A1	BCL2A1	-1.6942	4.87e-19	7.27e-19
10017	BCL2-like 10 (apoptosis facilitator)	BCL2L10	2.873	3.8e-118	2.81e-117
10018	BCL2-like 11 (apoptosis facilitator)	BCL2L11	-1.4694	1.94e-135	2.1e-134
83596	BCL2-like 12 (proline rich)	BCL2L12	-1.3304	1.92e-55	4.83e-55
79370	BCL2-like 14 (apoptosis facilitator)	BCL2L14	-0.97776	2.05e-19	3.07e-19
440603	BCL2-like 15	BCL2L15	-0.88896	3.96e-26	6.52e-26
599	BCL2-like 2	BCL2L2	1.8935	3.24e-180	9.76e-179
100529063	BCL2L2-PABPN1 readthrough	BCL2L2-PABPN1	-1.4131	3.35e-43	7.06e-43
602	B-cell CLL/lymphoma 3	BCL3	0.27968	0.0020672	0.0023323
604	B-cell CLL/lymphoma 6	BCL6	-0.48047	2.6e-12	3.51e-12
255877	B-cell CLL/lymphoma 6, member B	BCL6B	-0.30457	0.0013848	0.0015724
605	B-cell CLL/lymphoma 7A	BCL7A	0.21288	0.00034438	0.00039722
9274	B-cell CLL/lymphoma 7C	BCL7C	-1.3023	8.53e-102	4.59e-101
283149	B-cell CLL/lymphoma 9-like	BCL9L	-0.62155	9.57e-28	1.62e-27
83875	beta-carotene oxygenase 2	BCO2	1.7606	3.35e-123	2.76e-122
54880	BCL6 corepressor	BCOR	-0.50695	1.57e-26	2.61e-26
613	breakpoint cluster region	BCR	0.21897	5.31e-05	6.24e-05
622	3-hydroxybutyrate dehydrogenase, type 1	BDH1	2.1906	1.21e-140	1.49e-139
56898	3-hydroxybutyrate dehydrogenase, type 2	BDH2	-0.46054	1.34e-10	1.76e-10
623	bradykinin receptor B1	BDKRB1	2.1349	1.17e-50	2.76e-50
627	brain-derived neurotrophic factor	BDNF	2.1561	8.84e-52	2.12e-51
55814	B double prime 1, subunit of RNA polymerase III transcription initiation factor IIIB	BDP1	0.37566	1.1e-16	1.58e-16
146227	brain expressed, associated with NEDD4, 1	BEAN1	1.7199	6.61e-84	2.57e-83
8678	beclin 1, autophagy related	BECN1	-0.40617	5.97e-26	9.82e-26
57596	brain-enriched guanylate kinase-associated homolog (rat)	BEGAIN	3.7456	1.5e-199	6.64e-198
57673	BEN domain containing 3	BEND3	-1.0636	1.23e-87	5.11e-87
389206	BEN domain containing 4	BEND4	2.2615	1.26e-51	3.03e-51
79656	BEN domain containing 5	BEND5	0.80402	3.22e-59	8.54e-59
221336	BEN domain containing 6	BEND6	1.3025	5.63e-76	1.93e-75
222389	BEN domain containing 7	BEND7	-0.45426	5.83e-16	8.34e-16
144453	bestrophin 3	BEST3	-2.9569	2.25e-97	1.11e-96
266675	bestrophin 4	BEST4	1.6664	6.52e-63	1.82e-62
10282	blocked early in transport 1 homolog (S. cerevisiae)	BET1	-0.31059	1.31e-17	1.92e-17
51272	blocked early in transport 1 homolog (S. cerevisiae)-like	BET1L	-0.65406	7.34e-91	3.22e-90
100128327	BET3 like (S. cerevisiae)	BET3L	0.63989	4.98e-07	6.11e-07
55859	brain expressed, X-linked 1	BEX1	1.0993	4.55e-45	9.86e-45
84707	brain expressed X-linked 2	BEX2	2.0157	5.11e-111	3.27e-110
56271	brain expressed, X-linked 4	BEX4	1.0309	1.31e-76	4.55e-76
340542	brain expressed, X-linked 5	BEX5	3.5967	6.72e-140	8.2e-139
51283	bifunctional apoptosis regulator	BFAR	-0.72671	5.59e-138	6.51e-137
631	beaded filament structural protein 1, filensin	BFSP1	2.605	2.89e-151	4.61e-150
632	bone gamma-carboxyglutamate (gla) protein	BGLAP	2.4732	6.92e-169	1.69e-167
633	biglycan	BGN	-0.66762	3.4e-12	4.58e-12
168620	basic helix-loop-helix family, member a15	BHLHA15	1.9389	4.98e-48	1.13e-47
727857	basic helix-loop-helix family, member a9	BHLHA9	3.7553	3.34e-120	2.57e-119
80823	basic helix-loop-helix domain containing, class B, 9	BHLHB9	1.0406	2.67e-64	7.64e-64
27319	basic helix-loop-helix family, member e22	BHLHE22	4.4758	9.54e-143	1.24e-141
8553	basic helix-loop-helix family, member e40	BHLHE40	1.5047	3.78e-72	1.23e-71
79365	basic helix-loop-helix family, member e41	BHLHE41	-0.16432	0.0062868	0.0069975
635	betaine--homocysteine S-methyltransferase	BHMT	2.6043	9.09e-71	2.89e-70
23743	betaine--homocysteine S-methyltransferase 2	BHMT2	1.6169	2.84e-59	7.54e-59
80114	bicaudal C homolog 1 (Drosophila)	BICC1	0.83904	1.75e-30	3.08e-30
636	bicaudal D homolog 1 (Drosophila)	BICD1	-0.13664	0.0017955	0.0020305
638	BCL2-interacting killer (apoptosis-inducing)	BIK	-1.2173	1.06e-28	1.82e-28
274	bridging integrator 1	BIN1	0.60228	3.69e-31	6.55e-31
51411	bridging integrator 2	BIN2	-1.4878	1.92e-55	4.84e-55
55909	bridging integrator 3	BIN3	-0.52655	5.39e-46	1.19e-45
330	baculoviral IAP repeat containing 3	BIRC3	0.42762	3.36e-06	4.06e-06
332	baculoviral IAP repeat containing 5	BIRC5	-6.1264	4.98e-186	1.73e-184
57448	baculoviral IAP repeat containing 6	BIRC6	-0.12296	0.0013081	0.0014865
79444	baculoviral IAP repeat containing 7	BIRC7	-1.5537	8.15e-28	1.38e-27
10904	bladder cancer associated protein	BLCAP	0.87305	1.7e-90	7.41e-90
640	B lymphoid tyrosine kinase	BLK	-1.4828	7.93e-22	1.23e-21
641	Bloom syndrome, RecQ helicase-like	BLM	-0.97763	1.87e-32	3.38e-32
642	bleomycin hydrolase	BLMH	-0.81581	1.15e-135	1.25e-134
29760	B-cell linker	BLNK	-1.8178	2.74e-48	6.25e-48
2647	biogenesis of lysosomal organelles complex-1, subunit 1	BLOC1S1	0.89985	3.7e-57	9.52e-57
282991	biogenesis of lysosomal organelles complex-1, subunit 2	BLOC1S2	0.43243	1e-24	1.62e-24
90427	Bcl2 modifying factor	BMF	-2.5913	1.54e-139	1.87e-138
648	BMI1 polycomb ring finger oncogene	BMI1	0.26289	1.65e-11	2.2e-11
649	bone morphogenetic protein 1	BMP1	-0.81102	3.63e-46	8e-46
650	bone morphogenetic protein 2	BMP2	-3.1875	1.1e-131	1.1e-130
55589	BMP2 inducible kinase	BMP2K	-0.79523	1.3e-52	3.16e-52
651	bone morphogenetic protein 3	BMP3	3.1855	8.48e-95	3.98e-94
652	bone morphogenetic protein 4	BMP4	-0.77234	7.48e-16	1.07e-15
653	bone morphogenetic protein 5	BMP5	0.63022	0.0025274	0.0028449
654	bone morphogenetic protein 6	BMP6	0.38518	1.59e-05	1.89e-05
655	bone morphogenetic protein 7	BMP7	-0.89019	1.26e-29	2.18e-29
353500	bone morphogenetic protein 8a	BMP8A	0.85578	1.03e-32	1.88e-32
168667	BMP binding endothelial regulator	BMPER	0.75732	2.33e-16	3.34e-16
657	bone morphogenetic protein receptor, type IA	BMPR1A	-0.7839	1.56e-62	4.34e-62
658	bone morphogenetic protein receptor, type IB	BMPR1B	-0.26248	0.0065603	0.0072959
660	BMX non-receptor tyrosine kinase	BMX	0.65787	2.12e-07	2.62e-07
54796	basonuclin 2	BNC2	-1.3508	4.87e-34	8.97e-34
663	BCL2/adenovirus E1B 19kDa interacting protein 2	BNIP2	-0.81535	5.73e-65	1.65e-64
664	BCL2/adenovirus E1B 19kDa interacting protein 3	BNIP3	0.271	6.18e-10	8.01e-10
665	BCL2/adenovirus E1B 19kDa interacting protein 3-like	BNIP3L	-0.35638	1.72e-24	2.77e-24
91653	Boc homolog (mouse)	BOC	-1.31	8.76e-69	2.69e-68
666	BCL2-related ovarian killer	BOK	1.0547	2.22e-26	3.67e-26
552900	bolA homolog 2 (E. coli)	BOLA2	5.4419	4.28e-306	5.98e-304
388962	bolA homolog 3 (E. coli)	BOLA3	0.9242	8.19e-84	3.18e-83
79866	bora, aurora kinase A activator	BORA	-0.60939	6.38e-33	1.16e-32
670	biphenyl hydrolase-like (serine hydrolase)	BPHL	-0.71334	1.07e-71	3.44e-71
671	bactericidal/permeability-increasing protein	BPI	-1.056	2.83e-15	4e-15
80341	BPI fold containing family B, member 2	BPIFB2	-3.3216	1.98e-57	5.11e-57
10380	3'(2'), 5'-bisphosphate nucleotidase 1	BPNT1	-0.80744	3.39e-116	2.41e-115
673	v-raf murine sarcoma viral oncogene homolog B1	BRAF	0.6424	2.98e-57	7.68e-57
221927	BRCA1-associated ATM activator 1	BRAT1	-0.79985	3.52e-75	1.19e-74
672	breast cancer 1, early onset	BRCA1	-1.3058	3.59e-83	1.38e-82
675	breast cancer 2, early onset	BRCA2	-3.1056	1.06e-150	1.65e-149
8019	bromodomain containing 3	BRD3	-0.80013	1.51e-67	4.55e-67
29117	bromodomain containing 7	BRD7	-0.5305	6.67e-54	1.65e-53
676	bromodomain, testis-specific	BRDT	1.936	1.06e-80	3.9e-80
55290	BRF2, subunit of RNA polymerase III transcription initiation factor, BRF1-like	BRF2	-0.72427	1.68e-51	4.02e-51
25798	brain protein I3	BRI3	-0.47033	3.82e-29	6.59e-29
140707	BRI3 binding protein	BRI3BP	1.0834	1.62e-88	6.8e-88
83990	BRCA1 interacting protein C-terminal helicase 1	BRIP1	-1.4832	9.79e-42	2.02e-41
55299	BRX1, biogenesis of ribosomes, homolog (S. cerevisiae)	BRIX1	-0.6181	1.15e-71	3.71e-71
25855	breast cancer metastasis suppressor 1	BRMS1	-0.95756	3.62e-106	2.11e-105
84312	breast cancer metastasis-suppressor 1-like	BRMS1L	0.41858	8.34e-21	1.27e-20
148362	BRO1 domain and CAAX motif containing	BROX	-0.73775	7.43e-95	3.49e-94
25874	brain protein 44	BRP44	0.67104	2.15e-60	5.8e-60
7862	bromodomain and PHD finger containing, 1	BRPF1	-0.55711	5.29e-59	1.4e-58
27154	bromodomain and PHD finger containing, 3	BRPF3	0.30389	7.2e-13	9.8e-13
680	bombesin-like receptor 3	BRS3	0.88863	2.06e-07	2.55e-07
84446	BR serine/threonine kinase 1	BRSK1	2.8088	1.15e-215	6.15e-214
9024	BR serine/threonine kinase 2	BRSK2	2.4178	1.01e-132	1.02e-131
54014	bromodomain and WD repeat domain containing 1	BRWD1	0.80746	5.34e-73	1.75e-72
254065	bromodomain and WD repeat domain containing 3	BRWD3	-0.68177	2.6e-45	5.65e-45
26580	Berardinelli-Seip congenital lipodystrophy 2 (seipin)	BSCL2	5.152	0	0
682	basigin (Ok blood group)	BSG	0.28429	1.67e-13	2.29e-13
8927	bassoon (presynaptic cytomatrix protein)	BSN	2.6849	6.87e-113	4.59e-112
7809	Bartter syndrome, infantile, with sensorineural deafness (Barttin)	BSND	2.4936	5.28e-63	1.48e-62
54836	B-box and SPRY domain containing	BSPRY	2.6263	1.6e-114	1.1e-113
683	bone marrow stromal cell antigen 1	BST1	-1.1633	1.73e-44	3.72e-44
684	bone marrow stromal cell antigen 2	BST2	-0.71667	4.52e-14	6.27e-14
84280	BTB (POZ) domain containing 10	BTBD10	0.99289	5.3e-66	1.55e-65
121551	BTB (POZ) domain containing 11	BTBD11	1.5142	7.85e-43	1.64e-42
118663	BTB (POZ) domain containing 16	BTBD16	0.62849	1.17e-06	1.42e-06
388419	BTB (POZ) domain containing 17	BTBD17	-2.8235	9.82e-80	3.57e-79
643376	BTB (POZ) domain containing 18	BTBD18	0.97083	3.38e-36	6.43e-36
149478	BTB (POZ) domain containing 19	BTBD19	-1.3815	4.89e-61	1.33e-60
55643	BTB (POZ) domain containing 2	BTBD2	1.066	1.46e-101	7.8e-101
22903	BTB (POZ) domain containing 3	BTBD3	0.65924	4.43e-34	8.16e-34
90135	BTB (POZ) domain containing 6	BTBD6	1.3681	2.1e-149	3.18e-148
55727	BTB (POZ) domain containing 7	BTBD7	-0.46511	3.91e-35	7.34e-35
114781	BTB (POZ) domain containing 9	BTBD9	1.4727	6.64e-134	6.94e-133
685	betacellulin	BTC	0.94002	1.14e-14	1.59e-14
686	biotinidase	BTD	-1.0784	2.63e-122	2.13e-121
689	basic transcription factor 3	BTF3	-0.84756	4.03e-112	2.64e-111
91408	basic transcription factor 3-like 4	BTF3L4	-0.30368	1.05e-17	1.54e-17
694	B-cell translocation gene 1, anti-proliferative	BTG1	-1.342	9.96e-109	6.12e-108
7832	BTG family, member 2	BTG2	-1.3175	5.8e-50	1.36e-49
10950	BTG family, member 3	BTG3	-1.5143	2.63e-103	1.45e-102
695	Bruton agammaglobulinemia tyrosine kinase	BTK	-2.1012	1.3e-86	5.32e-86
151888	B and T lymphocyte associated	BTLA	-0.51694	1.8e-05	2.14e-05
696	butyrophilin, subfamily 1, member A1	BTN1A1	-0.67928	2.56e-07	3.15e-07
10385	butyrophilin, subfamily 2, member A2	BTN2A2	-1.043	3.57e-44	7.64e-44
11119	butyrophilin, subfamily 3, member A1	BTN3A1	-0.94177	3.01e-50	7.08e-50
11118	butyrophilin, subfamily 3, member A2	BTN3A2	-1.9324	7.94e-88	3.3e-87
10384	butyrophilin, subfamily 3, member A3	BTN3A3	-1.0626	2.31e-67	6.94e-67
56244	butyrophilin-like 2 (MHC class II associated)	BTNL2	0.78371	5.78e-10	7.49e-10
10917	butyrophilin-like 3	BTNL3	1.0474	1.98e-10	2.59e-10
153579	butyrophilin-like 9	BTNL9	2.4116	2.63e-110	1.67e-109
8945	beta-transducin repeat containing E3 ubiquitin protein ligase	BTRC	1.0798	8.26e-93	3.74e-92
699	budding uninhibited by benzimidazoles 1 homolog (yeast)	BUB1	-4.2211	5.78e-153	9.6e-152
701	budding uninhibited by benzimidazoles 1 homolog beta (yeast)	BUB1B	-3.2832	2.81e-109	1.75e-108
9184	budding uninhibited by benzimidazoles 3 homolog (yeast)	BUB3	-0.59353	1.12e-69	3.49e-69
84811	BUD13 homolog (S. cerevisiae)	BUD13	-0.6913	1.74e-121	1.38e-120
8896	BUD31 homolog (S. cerevisiae)	BUD31	-0.90527	1.34e-103	7.43e-103
11149	blood vessel epicardial substance	BVES	-0.61566	4.98e-14	6.89e-14
705	bystin-like	BYSL	-1.1356	4.01e-124	3.37e-123
9689	basic leucine zipper and W2 domains 1	BZW1	-0.88136	6.83e-98	3.42e-97
28969	basic leucine zipper and W2 domains 2	BZW2	-0.83496	1.27e-44	2.74e-44
414152	chromosome 10 open reading frame 105	C10orf105	0.99745	1.23e-08	1.56e-08
414235	chromosome 10 open reading frame 108	C10orf108	-0.43684	9.04e-05	0.00010574
399726	chromosome 10 open reading frame 114	C10orf114	2.2633	3.29e-137	3.75e-136
282969	chromosome 10 open reading frame 125	C10orf125	-0.96771	7.51e-36	1.42e-35
387640	chromosome 10 open reading frame 140	C10orf140	2.1559	3.79e-119	2.86e-118
54838	chromosome 10 open reading frame 26	C10orf26	-0.52171	8.2e-53	2e-52
254427	chromosome 10 open reading frame 47	C10orf47	0.81695	2.34e-26	3.87e-26
282966	chromosome 10 open reading frame 53	C10orf53	1.2606	5.73e-20	8.66e-20
414236	chromosome 10 open reading frame 55	C10orf55	-2.2957	7.98e-49	1.83e-48
256815	chromosome 10 open reading frame 67	C10orf67	2.2269	1.05e-88	4.42e-88
118461	chromosome 10 open reading frame 71	C10orf71	2.127	3.12e-43	6.57e-43
79949	chromosome 10 open reading frame 81	C10orf81	-0.64332	0.0002132	0.00024687
143379	chromosome 10 open reading frame 82	C10orf82	2.0661	2.95e-61	8.05e-61
80007	chromosome 10 open reading frame 88	C10orf88	0.54046	5.98e-40	1.2e-39
118611	chromosome 10 open reading frame 90	C10orf90	0.30417	0.0013789	0.0015658
79946	chromosome 10 open reading frame 95	C10orf95	-0.92631	1.56e-31	2.79e-31
64776	chromosome 11 open reading frame 1	C11orf1	-0.16465	5.85e-05	6.87e-05
746	chromosome 11 open reading frame 10	C11orf10	-0.69079	8.22e-66	2.4e-65
738	chromosome 11 open reading frame 2	C11orf2	-0.25693	1.2e-09	1.55e-09
29125	chromosome 11 open reading frame 21	C11orf21	0.71389	1.8e-12	2.44e-12
53838	chromosome 11 open reading frame 24	C11orf24	-0.50935	4.56e-35	8.53e-35
25758	chromosome 11 open reading frame 41	C11orf41	1.9576	1.1e-75	3.76e-75
25906	chromosome 11 open reading frame 51	C11orf51	0.53058	7.37e-45	1.59e-44
91894	chromosome 11 open reading frame 52	C11orf52	4.2768	1.82e-211	9.34e-210
28970	chromosome 11 open reading frame 54	C11orf54	-0.65017	5.31e-73	1.74e-72
160140	chromosome 11 open reading frame 65	C11orf65	-0.32593	2.45e-06	2.97e-06
28971	chromosome 11 open reading frame 67	C11orf67	-2.3045	2.42e-195	9.86e-194
83638	chromosome 11 open reading frame 68	C11orf68	0.48006	2.72e-42	5.63e-42
54494	chromosome 11 open reading frame 71	C11orf71	-9.9984	0	0
119710	chromosome 11 open reading frame 74	C11orf74	0.40579	2.69e-27	4.53e-27
56935	chromosome 11 open reading frame 75	C11orf75	-0.34657	8.92e-10	1.15e-09
79703	chromosome 11 open reading frame 80	C11orf80	1.3079	6.98e-115	4.83e-114
399947	chromosome 11 open reading frame 87	C11orf87	4.6772	1.41e-125	1.23e-124
399949	chromosome 11 open reading frame 88	C11orf88	-0.45939	0.0027803	0.0031259
745	chromosome 11 open reading frame 9	C11orf9	0.6308	1.01e-06	1.23e-06
100131378	chromosome 11 open reading frame 91	C11orf91	0.33156	0.0047817	0.0053416
120376	chromosome 11 open reading frame 93	C11orf93	1.1024	1.23e-26	2.05e-26
143678	chromosome 11 open reading frame 94	C11orf94	-2.3374	2.98e-77	1.05e-76
387763	chromosome 11 open reading frame 96	C11orf96	-0.95036	3.01e-16	4.33e-16
84190	chromosome 12 open reading frame 26	C12orf26	-0.42961	2.81e-28	4.79e-28
91298	chromosome 12 open reading frame 29	C12orf29	0.43321	8.56e-30	1.49e-29
84915	chromosome 12 open reading frame 34	C12orf34	-1.3081	1.57e-45	3.44e-45
55196	chromosome 12 open reading frame 35	C12orf35	-0.075082	0.035746	0.03878
283461	chromosome 12 open reading frame 40	C12orf40	0.62573	7.39e-06	8.86e-06
374470	chromosome 12 open reading frame 42	C12orf42	0.609	1.53e-08	1.93e-08
64897	chromosome 12 open reading frame 43	C12orf43	0.40191	4.15e-26	6.83e-26
79794	chromosome 12 open reading frame 49	C12orf49	-1.573	3.79e-163	8.03e-162
283450	chromosome 12 open reading frame 51	C12orf51	0.93103	2.12e-55	5.33e-55
196500	chromosome 12 open reading frame 53	C12orf53	1.4922	4.73e-87	1.94e-86
121273	chromosome 12 open reading frame 54	C12orf54	1.6512	3.05e-73	1.01e-72
115749	chromosome 12 open reading frame 56	C12orf56	-0.67152	1.41e-08	1.78e-08
113246	chromosome 12 open reading frame 57	C12orf57	-0.7573	2.35e-54	5.84e-54
120939	chromosome 12 open reading frame 59	C12orf59	-0.97741	4.6e-21	7.05e-21
144608	chromosome 12 open reading frame 60	C12orf60	-0.20279	3.84e-05	4.54e-05
144577	chromosome 12 open reading frame 66	C12orf66	-0.60836	8.4e-55	2.09e-54
341346	chromosome 12 open reading frame 70	C12orf70	2.0013	7.48e-70	2.34e-69
728858	chromosome 12 open reading frame 71	C12orf71	0.87896	7.79e-16	1.11e-15
728568	chromosome 12 open reading frame 73	C12orf73	0.28031	8.17e-20	1.23e-19
387882	chromosome 12 open reading frame 75	C12orf75	-0.43873	5.46e-10	7.08e-10
400073	chromosome 12 open reading frame 76	C12orf76	0.88793	1.04e-85	4.2e-85
84935	chromosome 13 open reading frame 33	C13orf33	1.4087	3.53e-26	5.82e-26
112487	chromosome 14 open reading frame 126	C14orf126	-0.72981	3e-62	8.28e-62
51527	chromosome 14 open reading frame 129	C14orf129	0.87243	1.28e-58	3.37e-58
56967	chromosome 14 open reading frame 132	C14orf132	0.9759	3.71e-38	7.24e-38
112849	chromosome 14 open reading frame 149	C14orf149	-0.71127	7.7e-46	1.69e-45
283579	chromosome 14 open reading frame 178	C14orf178	-1.2923	1.68e-22	2.63e-22
400258	chromosome 14 open reading frame 180	C14orf180	2.0376	1.28e-60	3.46e-60
161424	chromosome 14 open reading frame 21	C14orf21	-1.1344	3.89e-150	5.98e-149
122525	chromosome 14 open reading frame 28	C14orf28	0.5027	1.89e-40	3.83e-40
729665	chromosome 14 open reading frame 38	C14orf38	4.9294	1.27e-240	8.84e-239
161176	chromosome 14 open reading frame 49	C14orf49	-2.9717	1.52e-180	4.62e-179
60686	chromosome 14 open reading frame 93	C14orf93	-1.1673	9.95e-109	6.12e-108
57184	chromosome 15 open reading frame 17	C15orf17	2.2657	1.88340000000006e-311	0
23742	chromosome 15 open reading frame 2	C15orf2	3.5136	1.27e-127	1.16e-126
90417	chromosome 15 open reading frame 23	C15orf23	-0.34532	1.98e-13	2.72e-13
196951	chromosome 15 open reading frame 33	C15orf33	-0.54771	7.34e-22	1.14e-21
56905	chromosome 15 open reading frame 39	C15orf39	-1.495	2.92e-110	1.85e-109
123207	chromosome 15 open reading frame 40	C15orf40	-1.1041	9.44e-171	2.4e-169
90381	chromosome 15 open reading frame 42	C15orf42	-1.856	8.8e-102	4.73e-101
84419	chromosome 15 open reading frame 48	C15orf48	-2.2611	3.53e-45	7.66e-45
390637	chromosome 15 open reading frame 58	C15orf58	-1.2731	3.69e-128	3.4e-127
145853	chromosome 15 open reading frame 61	C15orf61	0.50033	1.12e-40	2.28e-40
643338	chromosome 15 open reading frame 62	C15orf62	1.2681	2.99e-70	9.42e-70
25764	chromosome 15 open reading frame 63	C15orf63	-1.1374	1.64e-92	7.41e-92
89927	chromosome 16 open reading frame 45	C16orf45	1.1253	9.99e-87	4.08e-86
123775	chromosome 16 open reading frame 46	C16orf46	2.0616	1.33e-245	9.85e-244
84080	chromosome 16 open reading frame 48	C16orf48	-0.52022	3.52e-29	6.08e-29
29965	chromosome 16 open reading frame 5	C16orf5	1.081	1.64e-99	8.44e-99
283897	chromosome 16 open reading frame 54	C16orf54	-2.2337	1.02e-66	3.02e-66
124045	chromosome 16 open reading frame 55	C16orf55	0.51077	6.32e-40	1.27e-39
64755	chromosome 16 open reading frame 58	C16orf58	0.56184	5.59e-47	1.25e-46
9605	chromosome 16 open reading frame 7	C16orf7	0.91622	8.33e-89	3.53e-88
80262	chromosome 16 open reading frame 70	C16orf70	0.1534	0.00018733	0.00021738
146562	chromosome 16 open reading frame 71	C16orf71	-1.2116	8.28e-86	3.33e-85
29035	chromosome 16 open reading frame 72	C16orf72	-0.47136	6.76e-57	1.73e-56
404550	chromosome 16 open reading frame 74	C16orf74	1.2202	7.74e-38	1.5e-37
283870	chromosome 16 open reading frame 79	C16orf79	1.9046	1.44e-113	9.75e-113
388284	chromosome 16 open reading frame 86	C16orf86	0.16077	0.0018729	0.0021157
400506	chromosome 16 open reading frame 88	C16orf88	-1.2885	1.17e-138	1.39e-137
146556	chromosome 16 open reading frame 89	C16orf89	1.738	2.36e-55	5.94e-55
146378	chromosome 16 open reading frame 92	C16orf92	-1.6099	2.67e-33	4.88e-33
100506581	chromosome 16 open reading frame 95	C16orf95	1.098	1.42e-94	6.66e-94
342346	chromosome 16 open reading frame 96	C16orf96	-0.22086	0.0011667	0.0013273
79701	chromosome 17 open reading frame 101	C17orf101	-0.71513	4.14e-77	1.45e-76
100130311	chromosome 17 open reading frame 107	C17orf107	2.0897	4.03e-99	2.07e-98
201229	chromosome 17 open reading frame 108	C17orf108	1.463	5.79e-100	3.01e-99
643008	chromosome 17 open reading frame 109	C17orf109	-0.72588	9.32e-13	1.27e-12
100130933	chromosome 17 open reading frame 110	C17orf110	0.44529	0.00068902	0.00078815
283987	chromosome 17 open reading frame 28	C17orf28	2.0424	1.78e-145	2.45e-144
56985	chromosome 17 open reading frame 48	C17orf48	-0.48339	3.38e-40	6.82e-40
124944	chromosome 17 open reading frame 49	C17orf49	0.76394	3.82e-64	1.09e-63
339263	chromosome 17 open reading frame 51	C17orf51	1.4569	2.62e-107	1.56e-106
78995	chromosome 17 open reading frame 53	C17orf53	-1.7922	5.42e-115	3.76e-114
124989	chromosome 17 open reading frame 57	C17orf57	0.323	3.29e-06	3.97e-06
254863	chromosome 17 open reading frame 61	C17orf61	-0.22849	1.65e-06	2e-06
339210	chromosome 17 open reading frame 67	C17orf67	1.5986	2.74e-104	1.54e-103
64149	chromosome 17 open reading frame 75	C17orf75	-0.70689	1.28e-57	3.31e-57
55352	chromosome 17 open reading frame 79	C17orf79	0.74351	3.82e-77	1.34e-76
400566	chromosome 17 open reading frame 97	C17orf97	0.37067	6.99e-12	9.37e-12
753	chromosome 18 open reading frame 1	C18orf1	-0.22809	5.8e-06	6.97e-06
497661	chromosome 18 open reading frame 32	C18orf32	3.0214	9.83109999999752e-312	0
374864	chromosome 18 open reading frame 34	C18orf34	-1.8953	1.56e-36	2.98e-36
162681	chromosome 18 open reading frame 54	C18orf54	-1.2478	1.29e-73	4.28e-73
83636	chromosome 19 open reading frame 12	C19orf12	0.48216	1.54e-40	3.11e-40
147685	chromosome 19 open reading frame 18	C19orf18	-0.38633	2.37e-05	2.81e-05
126353	chromosome 19 open reading frame 21	C19orf21	1.184	3.42e-29	5.9e-29
55009	chromosome 19 open reading frame 24	C19orf24	-0.29697	2.69e-12	3.62e-12
64073	chromosome 19 open reading frame 33	C19orf33	1.7816	3.22e-38	6.29e-38
255809	chromosome 19 open reading frame 38	C19orf38	-1.6937	3.38e-64	9.63e-64
84167	chromosome 19 open reading frame 44	C19orf44	-0.60823	2.97e-52	7.17e-52
163183	chromosome 19 open reading frame 46	C19orf46	0.60648	7.47e-17	1.08e-16
84798	chromosome 19 open reading frame 48	C19orf48	-1.2185	5.56e-89	2.36e-88
352909	chromosome 19 open reading frame 51	C19orf51	-1.7486	2.45e-39	4.89e-39
284325	chromosome 19 open reading frame 54	C19orf54	-1.1804	2.73e-87	1.12e-86
79173	chromosome 19 open reading frame 57	C19orf57	-1.011	4.12e-72	1.33e-71
91304	chromosome 19 open reading frame 6	C19orf6	0.35381	1.66e-20	2.53e-20
284361	chromosome 19 open reading frame 63	C19orf63	-1.1527	2.04e-119	1.55e-118
55337	chromosome 19 open reading frame 66	C19orf66	0.98653	8.66e-67	2.58e-66
125988	chromosome 19 open reading frame 70	C19orf70	0.18573	2.18e-06	2.64e-06
55150	chromosome 19 open reading frame 73	C19orf73	0.39684	1.86e-14	2.59e-14
199800	chromosome 19 open reading frame 76	C19orf76	0.74571	1.92e-26	3.19e-26
100131801	chromosome 19 open reading frame 79	C19orf79	0.17276	9.92e-05	0.00011589
10438	C1D nuclear receptor corepressor	C1D	0.58679	1.29e-55	3.25e-55
56913	core 1 synthase, glycoprotein-N-acetylgalactosamine 3-beta-galactosyltransferase, 1	C1GALT1	-0.46832	1.22e-31	2.18e-31
29071	C1GALT1-specific chaperone 1	C1GALT1C1	-0.81682	8.1e-89	3.43e-88
200159	chromosome 1 open reading frame 100	C1orf100	1.4899	3.67e-37	7.07e-37
54955	chromosome 1 open reading frame 109	C1orf109	-0.39917	1.23e-30	2.17e-30
55732	chromosome 1 open reading frame 112	C1orf112	-1.3589	2.47e-107	1.47e-106
57821	chromosome 1 open reading frame 114	C1orf114	0.8623	3.15e-64	8.98e-64
79762	chromosome 1 open reading frame 115	C1orf115	3.8917	1.28e-181	3.99e-180
127687	chromosome 1 open reading frame 122	C1orf122	0.53424	4.38e-25	7.11e-25
83932	chromosome 1 open reading frame 124	C1orf124	-1.0117	2.01e-148	2.97e-147
400746	chromosome 1 open reading frame 130	C1orf130	-0.78861	4.37e-07	5.36e-07
79000	chromosome 1 open reading frame 135	C1orf135	0.63316	1.96e-17	2.86e-17
400757	chromosome 1 open reading frame 141	C1orf141	2.158	5.81e-47	1.3e-46
26099	chromosome 1 open reading frame 144	C1orf144	-1.0768	8.29e-77	2.89e-76
148823	chromosome 1 open reading frame 150	C1orf150	0.77446	6.04e-07	7.4e-07
93190	chromosome 1 open reading frame 158	C1orf158	-2.6484	1.34e-41	2.75e-41
54991	chromosome 1 open reading frame 159	C1orf159	1.4733	5.41e-138	6.3e-137
128346	chromosome 1 open reading frame 162	C1orf162	-0.75431	1.2e-21	1.85e-21
128229	chromosome 1 open reading frame 182	C1orf182	-0.21452	0.01516	0.016655
374946	chromosome 1 open reading frame 187	C1orf187	-1.6599	1.05e-51	2.52e-51
84886	chromosome 1 open reading frame 198	C1orf198	-0.50605	2.78e-12	3.74e-12
90529	chromosome 1 open reading frame 201	C1orf201	2.4171	2.9e-117	2.1e-116
81563	chromosome 1 open reading frame 21	C1orf21	0.87081	7.67e-62	2.11e-61
113444	chromosome 1 open reading frame 212	C1orf212	0.57432	6.9e-47	1.54e-46
127703	chromosome 1 open reading frame 216	C1orf216	1.5504	3.4e-94	1.58e-93
400793	chromosome 1 open reading frame 226	C1orf226	-2.1017	1.04e-134	1.11e-133
388753	chromosome 1 open reading frame 31	C1orf31	0.49134	4.16e-34	7.68e-34
9473	chromosome 1 open reading frame 38	C1orf38	-0.8695	4.22e-25	6.86e-25
84066	chromosome 1 open reading frame 49	C1orf49	0.96616	5e-13	6.83e-13
148423	chromosome 1 open reading frame 52	C1orf52	0.66948	9.03e-75	3.04e-74
79630	chromosome 1 open reading frame 54	C1orf54	-0.34286	3.22e-06	3.89e-06
163859	chromosome 1 open reading frame 55	C1orf55	-1.1295	3.23e-94	1.5e-93
54964	chromosome 1 open reading frame 56	C1orf56	-1.3291	7.46e-157	1.36e-155
10485	chromosome 1 open reading frame 61	C1orf61	-0.97655	6.73e-24	1.08e-23
148304	chromosome 1 open reading frame 74	C1orf74	-0.73394	9.57e-36	1.81e-35
128344	chromosome 1 open reading frame 88	C1orf88	-0.72198	1.01e-16	1.47e-16
51430	chromosome 1 open reading frame 9	C1orf9	-1.0912	2.41e-138	2.84e-137
84970	chromosome 1 open reading frame 94	C1orf94	-2.4988	2.8e-110	1.77e-109
126731	chromosome 1 open reading frame 96	C1orf96	0.73996	1.65e-52	4e-52
712	complement component 1, q subcomponent, A chain	C1QA	-3.4423	1.94e-104	1.09e-103
713	complement component 1, q subcomponent, B chain	C1QB	-3.2585	1.21e-87	5e-87
714	complement component 1, q subcomponent, C chain	C1QC	-3.5385	1.3e-104	7.37e-104
10882	complement component 1, q subcomponent-like 1	C1QL1	-1.9807	1.2e-72	3.94e-72
165257	complement component 1, q subcomponent-like 2	C1QL2	3.8021	1.07e-125	9.38e-125
389941	complement component 1, q subcomponent-like 3	C1QL3	4.0522	7.1e-77	2.48e-76
338761	complement component 1, q subcomponent-like 4	C1QL4	-2.903	1.77e-74	5.94e-74
114897	C1q and tumor necrosis factor related protein 1	C1QTNF1	-1.2755	1.59e-35	3e-35
114898	C1q and tumor necrosis factor related protein 2	C1QTNF2	0.6617	1.4e-18	2.08e-18
114899	C1q and tumor necrosis factor related protein 3	C1QTNF3	-0.25609	0.00089553	0.0010219
114900	C1q and tumor necrosis factor related protein 4	C1QTNF4	3.8827	8.45e-167	1.96e-165
114902	C1q and tumor necrosis factor related protein 5	C1QTNF5	9.846	0	0
114904	C1q and tumor necrosis factor related protein 6	C1QTNF6	-0.74538	6.26e-24	1e-23
114905	C1q and tumor necrosis factor related protein 7	C1QTNF7	0.80716	8.05e-22	1.25e-21
390664	C1q and tumor necrosis factor related protein 8	C1QTNF8	0.34283	0.015814	0.017363
338872	C1q and tumor necrosis factor related protein 9	C1QTNF9	-0.51868	0.00034871	0.00040217
387911	C1q and tumor necrosis factor related protein 9B	C1QTNF9B	1.5771	1.12e-32	2.03e-32
51279	complement component 1, r subcomponent-like	C1RL	-0.30034	0.00060113	0.00068872
716	complement component 1, s subcomponent	C1S	-1.0725	8.95e-27	1.49e-26
717	complement component 2	C2	-0.9101	3.02e-21	4.64e-21
140711	chromosome 20 open reading frame 118	C20orf118	-0.17952	0.024329	0.026547
140699	chromosome 20 open reading frame 132	C20orf132	0.4768	2.71e-32	4.88e-32
128864	chromosome 20 open reading frame 144	C20orf144	-4.2563	8.67e-209	4.27e-207
140893	chromosome 20 open reading frame 151	C20orf151	4.337	8.61e-92	3.84e-91
140894	chromosome 20 open reading frame 152	C20orf152	-1.5858	1.89e-47	4.27e-47
140706	chromosome 20 open reading frame 160	C20orf160	0.60365	3.7e-30	6.47e-30
400831	chromosome 20 open reading frame 202	C20orf202	-0.27361	9.04e-07	1.1e-06
25980	chromosome 20 open reading frame 4	C20orf4	-1.1124	1.55e-202	7.01e-201
79133	chromosome 20 open reading frame 7	C20orf7	0.32792	3.2e-19	4.78e-19
92667	chromosome 20 open reading frame 72	C20orf72	-1.0335	9.25e-77	3.22e-76
84221	chromosome 21 open reading frame 56	C21orf56	0.65981	4.39e-19	6.55e-19
54058	chromosome 21 open reading frame 58	C21orf58	-0.2142	4.53e-05	5.34e-05
56245	chromosome 21 open reading frame 62	C21orf62	-3.7802	1.65e-104	9.35e-104
59271	chromosome 21 open reading frame 63	C21orf63	0.39028	6.95e-08	8.68e-08
56911	chromosome 21 open reading frame 7	C21orf7	-0.70699	1.04e-12	1.42e-12
54149	chromosome 21 open reading frame 91	C21orf91	-0.51237	3.99e-08	5e-08
83606	chromosome 22 open reading frame 13	C22orf13	-0.64793	1.66e-64	4.75e-64
150248	chromosome 22 open reading frame 15	C22orf15	-0.55827	4.77e-06	5.74e-06
84645	chromosome 22 open reading frame 23	C22orf23	-0.43647	2.25e-20	3.42e-20
128989	chromosome 22 open reading frame 25	C22orf25	-0.086877	0.020409	0.022331
51493	chromosome 22 open reading frame 28	C22orf28	-0.53068	6.8e-70	2.13e-69
25770	chromosome 22 open reading frame 31	C22orf31	5.3051	1.28e-195	5.27e-194
79640	chromosome 22 open reading frame 46	C22orf46	-0.53272	5.32e-21	8.15e-21
25966	C2 calcium-dependent domain containing 2	C2CD2	1.1366	1.23e-100	6.46e-100
9854	C2CD2-like	C2CD2L	1.4739	2.41e-118	1.79e-117
388125	C2 calcium-dependent domain containing 4B	C2CD4B	1.5393	7.55e-22	1.17e-21
126567	C2 calcium-dependent domain containing 4C	C2CD4C	3.1025	5.93e-174	1.6e-172
100191040	C2 calcium-dependent domain containing 4D	C2CD4D	1.8878	1.7e-69	5.3e-69
84226	chromosome 2 open reading frame 16	C2orf16	-0.20993	0.00055954	0.00064172
54978	chromosome 2 open reading frame 18	C2orf18	-0.71017	4.22e-97	2.07e-96
51374	chromosome 2 open reading frame 28	C2orf28	-1.3371	1.01e-141	1.28e-140
84417	chromosome 2 open reading frame 40	C2orf40	0.5324	1.07e-08	1.36e-08
79074	chromosome 2 open reading frame 49	C2orf49	-0.33897	7.15e-27	1.19e-26
130813	chromosome 2 open reading frame 50	C2orf50	2.1682	2.75e-64	7.86e-64
343990	chromosome 2 open reading frame 55	C2orf55	2.9095	7.88e-151	1.23e-149
130162	chromosome 2 open reading frame 63	C2orf63	-0.47191	1.07e-38	2.11e-38
130951	chromosome 2 open reading frame 65	C2orf65	0.60731	3.34e-14	4.65e-14
388969	chromosome 2 open reading frame 68	C2orf68	-1.4066	1.17e-128	1.09e-127
205327	chromosome 2 open reading frame 69	C2orf69	0.61546	1.09e-45	2.38e-45
257407	chromosome 2 open reading frame 72	C2orf72	0.75168	1.18e-43	2.5e-43
129852	chromosome 2 open reading frame 73	C2orf73	0.70226	5.15e-19	7.68e-19
339804	chromosome 2 open reading frame 74	C2orf74	-8.4246	0	0
130355	chromosome 2 open reading frame 76	C2orf76	-0.62946	7.75e-53	1.89e-52
389073	chromosome 2 open reading frame 80	C2orf80	1.7763	1.84e-67	5.53e-67
653140	chromosome 2 open reading frame 84	C2orf84	2.4824	1.36e-208	6.7e-207
84281	chromosome 2 open reading frame 88	C2orf88	-1.7645	3.54e-85	1.41e-84
129293	chromosome 2 open reading frame 89	C2orf89	2.3452	2.33e-87	9.59e-87
400950	chromosome 2 open reading frame 91	C2orf91	-0.81764	1.77e-07	2.19e-07
718	complement component 3	C3	-3.2763	2.98e-103	1.64e-102
719	complement component 3a receptor 1	C3AR1	-3.119	2.96e-96	1.43e-95
57415	chromosome 3 open reading frame 14	C3orf14	1.7549	1.31e-98	6.64e-98
89876	chromosome 3 open reading frame 15	C3orf15	1.2541	1e-54	2.5e-54
51161	chromosome 3 open reading frame 18	C3orf18	0.73168	1.04e-74	3.49e-74
51244	chromosome 3 open reading frame 19	C3orf19	-0.55092	1.7e-62	4.71e-62
84077	chromosome 3 open reading frame 20	C3orf20	-1.2515	1.48e-28	2.53e-28
285343	chromosome 3 open reading frame 23	C3orf23	-0.36144	8.06e-29	1.38e-28
90288	chromosome 3 open reading frame 25	C3orf25	1.1033	1.62e-34	3.01e-34
84319	chromosome 3 open reading frame 26	C3orf26	0.091793	0.015433	0.016952
51066	chromosome 3 open reading frame 32	C3orf32	1.6956	5.74e-75	1.94e-74
285315	chromosome 3 open reading frame 33	C3orf33	0.53985	1.13e-58	2.98e-58
285237	chromosome 3 open reading frame 38	C3orf38	-0.95098	6.91e-110	4.35e-109
84892	chromosome 3 open reading frame 39	C3orf39	-0.13345	0.00038907	0.00044814
255798	chromosome 3 open reading frame 43	C3orf43	1.6707	1.19e-47	2.68e-47
132200	chromosome 3 open reading frame 49	C3orf49	-0.24595	0.011943	0.013166
79669	chromosome 3 open reading frame 52	C3orf52	1.602	1.09e-38	2.15e-38
285203	chromosome 3 open reading frame 64	C3orf64	0.84206	5.13e-57	1.32e-56
200844	chromosome 3 open reading frame 67	C3orf67	1.0669	7.04e-28	1.19e-27
285382	chromosome 3 open reading frame 70	C3orf70	-0.40662	2.33e-08	2.94e-08
646450	chromosome 3 open reading frame 71	C3orf71	-0.19442	0.00015271	0.00017767
440957	chromosome 3 open reading frame 78	C3orf78	-0.45819	3.34e-26	5.52e-26
401097	chromosome 3 open reading frame 80	C3orf80	3.5857	1.91e-115	1.33e-114
720	complement component 4A (Rodgers blood group)	C4A	-1.7504	2.66e-36	5.07e-36
721	complement component 4B (Chido blood group)	C4B	-2.3971	8.23e-54	2.03e-53
722	complement component 4 binding protein, alpha	C4BPA	0.30576	0.011656	0.012854
55286	chromosome 4 open reading frame 19	C4orf19	-0.66491	3.23e-14	4.49e-14
132321	chromosome 4 open reading frame 33	C4orf33	0.24225	3.99e-09	5.1e-09
201895	chromosome 4 open reading frame 34	C4orf34	-0.098287	0.0058493	0.006517
132989	chromosome 4 open reading frame 36	C4orf36	-0.80994	4.97e-66	1.46e-65
285555	chromosome 4 open reading frame 37	C4orf37	0.57661	2.47e-11	3.27e-11
152940	chromosome 4 open reading frame 45	C4orf45	1.509	4.75e-38	9.26e-38
201725	chromosome 4 open reading frame 46	C4orf46	-1.1197	1.86e-109	1.16e-108
441054	chromosome 4 open reading frame 47	C4orf47	-0.37839	1.66e-06	2.01e-06
401115	chromosome 4 open reading frame 48	C4orf48	0.84145	6.4e-20	9.66e-20
84709	chromosome 4 open reading frame 49	C4orf49	0.69529	2.27e-19	3.4e-19
389197	chromosome 4 open reading frame 50	C4orf50	2.4762	2.28e-55	5.72e-55
727	complement component 5	C5	-0.2402	4.25e-05	5.02e-05
728	complement component 5a receptor 1	C5AR1	-1.5769	1.56e-36	2.98e-36
56951	chromosome 5 open reading frame 15	C5orf15	-0.95473	4.1e-101	2.17e-100
55322	chromosome 5 open reading frame 22	C5orf22	0.22524	3.38e-07	4.16e-07
134553	chromosome 5 open reading frame 24	C5orf24	-0.27028	3.29e-14	4.57e-14
375484	chromosome 5 open reading frame 25	C5orf25	1.6814	1.03e-83	3.98e-83
90355	chromosome 5 open reading frame 30	C5orf30	1.2356	1.48e-100	7.74e-100
153571	chromosome 5 open reading frame 38	C5orf38	-2.9618	5.8e-39	1.15e-38
389289	chromosome 5 open reading frame 39	C5orf39	-1.8744	7.52e-86	3.03e-85
10826	chromosome 5 open reading frame 4	C5orf4	-0.23061	0.00018878	0.00021901
643155	chromosome 5 open reading frame 43	C5orf43	-0.60324	4.88e-55	1.22e-54
80006	chromosome 5 open reading frame 44	C5orf44	-0.092923	0.0056226	0.006267
133491	chromosome 5 open reading frame 47	C5orf47	0.99751	2.21e-29	3.82e-29
134121	chromosome 5 open reading frame 49	C5orf49	2.5836	6.69e-105	3.8e-104
285636	chromosome 5 open reading frame 51	C5orf51	-0.53335	1.04e-50	2.46e-50
133874	chromosome 5 open reading frame 58	C5orf58	0.54559	1.63e-06	1.98e-06
85027	chromosome 5 open reading frame 62	C5orf62	-10.011	0	0
401207	chromosome 5 open reading frame 63	C5orf63	0.45371	1.05e-08	1.33e-08
389333	chromosome 5 open reading frame 65	C5orf65	-0.91844	3.33e-44	7.12e-44
729	complement component 6	C6	0.32982	0.04339	0.04693
64771	chromosome 6 open reading frame 106	C6orf106	1.2325	2.97e-124	2.51e-123
58527	chromosome 6 open reading frame 115	C6orf115	1.0659	2.85e-56	7.24e-56
168090	chromosome 6 open reading frame 118	C6orf118	-0.82494	2.27e-14	3.16e-14
647024	chromosome 6 open reading frame 132	C6orf132	0.87588	1.89e-14	2.64e-14
221545	chromosome 6 open reading frame 136	C6orf136	1.3367	1.44e-160	2.81e-159
135398	chromosome 6 open reading frame 141	C6orf141	1.1158	5.27e-11	6.96e-11
57150	chromosome 6 open reading frame 162	C6orf162	0.70383	4.86e-53	1.19e-52
206412	chromosome 6 open reading frame 163	C6orf163	0.4323	7.16e-09	9.11e-09
116843	chromosome 6 open reading frame 192	C6orf192	0.36936	5.17e-09	6.59e-09
404220	chromosome 6 open reading frame 201	C6orf201	1.1824	4.79e-47	1.07e-46
154288	chromosome 6 open reading frame 221	C6orf221	1.2434	4.43e-22	6.89e-22
389384	chromosome 6 open reading frame 222	C6orf222	2.9544	3.46e-88	1.45e-87
221416	chromosome 6 open reading frame 223	C6orf223	3.8792	3.97e-94	1.84e-93
441150	chromosome 6 open reading frame 226	C6orf226	-0.34839	1.56e-13	2.14e-13
221710	chromosome 6 open reading frame 228	C6orf228	0.57743	2.83e-30	4.95e-30
57827	chromosome 6 open reading frame 47	C6orf47	-1.1732	2.34e-188	8.5e-187
50854	chromosome 6 open reading frame 48	C6orf48	-0.73728	6.97e-47	1.56e-46
347744	chromosome 6 open reading frame 52	C6orf52	-0.89589	6.96e-30	1.21e-29
352999	chromosome 6 open reading frame 58	C6orf58	-1.4493	4.23e-31	7.49e-31
81688	chromosome 6 open reading frame 62	C6orf62	-0.57559	3.7e-67	1.11e-66
55780	chromosome 6 open reading frame 70	C6orf70	-0.16186	3.32e-05	3.92e-05
116254	chromosome 6 open reading frame 72	C6orf72	-0.37146	3.51e-25	5.71e-25
80129	chromosome 6 open reading frame 97	C6orf97	-0.95833	1.54e-20	2.35e-20
79020	chromosome 7 open reading frame 25	C7orf25	4.1909	0	0
113763	chromosome 7 open reading frame 29	C7orf29	0.9337	1.02e-27	1.73e-27
136895	chromosome 7 open reading frame 31	C7orf31	-0.84635	1.03e-32	1.87e-32
55262	chromosome 7 open reading frame 43	C7orf43	0.39174	3.51e-25	5.71e-25
340277	chromosome 7 open reading frame 46	C7orf46	0.63359	3.92e-19	5.85e-19
84310	chromosome 7 open reading frame 50	C7orf50	0.13876	0.0023455	0.002642
286006	chromosome 7 open reading frame 53	C7orf53	1.5331	9.02e-81	3.34e-80
136288	chromosome 7 open reading frame 57	C7orf57	-1.4839	5.99e-23	9.45e-23
79974	chromosome 7 open reading frame 58	C7orf58	-1.029	3.06e-24	4.91e-24
402573	chromosome 7 open reading frame 61	C7orf61	-1.6881	2.92e-55	7.33e-55
84792	chromosome 7 open reading frame 70	C7orf70	0.23943	9.52e-11	1.25e-10
733	complement component 8, gamma polypeptide	C8G	0.46866	8.59e-13	1.17e-12
65265	chromosome 8 open reading frame 33	C8orf33	-0.54085	1.23e-41	2.53e-41
116328	chromosome 8 open reading frame 34	C8orf34	0.99884	8.85e-17	1.28e-16
157657	chromosome 8 open reading frame 37	C8orf37	-0.76555	2.34e-53	5.76e-53
157695	chromosome 8 open reading frame 42	C8orf42	0.6378	4.82e-44	1.03e-43
56260	chromosome 8 open reading frame 44	C8orf44	0.25262	3.65e-11	4.83e-11
157777	chromosome 8 open reading frame 45	C8orf45	0.15338	0.0042641	0.0047685
157773	chromosome 8 open reading frame 48	C8orf48	-0.14425	0.039579	0.042863
51337	chromosome 8 open reading frame 55	C8orf55	0.2922	6.58e-12	8.81e-12
541565	chromosome 8 open reading frame 58	C8orf58	-0.13867	0.0012071	0.0013726
401466	chromosome 8 open reading frame 59	C8orf59	-0.57644	2.73e-51	6.52e-51
642475	chromosome 8 open reading frame 73	C8orf73	1.1275	5.33e-48	1.21e-47
84933	chromosome 8 open reading frame 76	C8orf76	1.11	4.78e-136	5.27e-135
414919	chromosome 8 open reading frame 82	C8orf82	0.13644	0.0037075	0.0041522
286144	chromosome 8 open reading frame 83	C8orf83	-1.845	3.03e-148	4.44e-147
157869	chromosome 8 open reading frame 84	C8orf84	0.36701	5.71e-07	6.99e-07
441376	chromosome 8 open reading frame 85	C8orf85	2.9014	7.86e-104	4.38e-103
389649	chromosome 8 open reading frame 86	C8orf86	1.349	3.39e-25	5.52e-25
84904	chromosome 9 open reading frame 100	C9orf100	-0.80918	7.57e-24	1.21e-23
375748	chromosome 9 open reading frame 102	C9orf102	-0.48882	5.39e-31	9.54e-31
414328	chromosome 9 open reading frame 103	C9orf103	0.66636	7.52e-34	1.38e-33
54586	chromosome 9 open reading frame 11	C9orf11	-0.8694	1.04e-10	1.36e-10
138162	chromosome 9 open reading frame 116	C9orf116	0.43083	2.48e-18	3.66e-18
84302	chromosome 9 open reading frame 125	C9orf125	1.7104	7.11e-58	1.85e-57
392307	chromosome 9 open reading frame 128	C9orf128	0.42838	2.09e-06	2.53e-06
445577	chromosome 9 open reading frame 129	C9orf129	1.8126	2.02e-55	5.08e-55
138724	chromosome 9 open reading frame 131	C9orf131	2.389	2.03e-123	1.68e-122
389766	chromosome 9 open reading frame 153	C9orf153	-1.2334	1.52e-22	2.38e-22
79095	chromosome 9 open reading frame 16	C9orf16	1.4786	8.83e-141	1.1e-139
54863	chromosome 9 open reading frame 167	C9orf167	-0.94151	2.34e-32	4.22e-32
100499483	chromosome 9 open reading frame 174	C9orf174	2.8304	1.38e-192	5.41e-191
84688	chromosome 9 open reading frame 24	C9orf24	4.0176	1.66e-151	2.66e-150
203259	chromosome 9 open reading frame 25	C9orf25	0.98026	1.82e-98	9.23e-98
84909	chromosome 9 open reading frame 3	C9orf3	0.75229	1.51e-41	3.1e-41
91283	chromosome 9 open reading frame 30	C9orf30	-0.37783	1.09e-23	1.73e-23
55071	chromosome 9 open reading frame 40	C9orf40	0.82955	5.85e-68	1.78e-67
257169	chromosome 9 open reading frame 43	C9orf43	0.36999	2.47e-07	3.05e-07
55848	chromosome 9 open reading frame 46	C9orf46	-1.1814	9.36e-104	5.21e-103
23731	chromosome 9 open reading frame 5	C9orf5	0.13279	0.00040326	0.00046422
375759	chromosome 9 open reading frame 50	C9orf50	-0.75314	1.87e-25	3.06e-25
84267	chromosome 9 open reading frame 64	C9orf64	0.2089	0.0055565	0.0061954
157983	chromosome 9 open reading frame 66	C9orf66	-1.4039	4.5e-25	7.3e-25
55064	chromosome 9 open reading frame 68	C9orf68	2.8205	6.08e-230	3.88e-228
11094	chromosome 9 open reading frame 7	C9orf7	-0.90145	3.84e-77	1.34e-76
169693	chromosome 9 open reading frame 71	C9orf71	-1.1783	1.12e-15	1.6e-15
203228	chromosome 9 open reading frame 72	C9orf72	0.71608	4.45e-52	1.07e-51
286234	chromosome 9 open reading frame 79	C9orf79	1.4486	8.69e-27	1.45e-26
158401	chromosome 9 open reading frame 84	C9orf84	-0.9393	1.89e-15	2.68e-15
138241	chromosome 9 open reading frame 85	C9orf85	-0.41701	6.49e-30	1.13e-29
55684	chromosome 9 open reading frame 86	C9orf86	1.0793	2.72e-130	2.63e-129
203238	chromosome 9 open reading frame 93	C9orf93	0.907	4.29e-64	1.22e-63
54981	chromosome 9 open reading frame 95	C9orf95	1.4575	2.41e-128	2.23e-127
759	carbonic anhydrase I	CA1	1.8384	1.22e-22	1.91e-22
56934	carbonic anhydrase X	CA10	2.164	5.19e-52	1.25e-51
770	carbonic anhydrase XI	CA11	3.4791	3.77e-206	1.8e-204
771	carbonic anhydrase XII	CA12	-1.9206	2.85e-36	5.43e-36
377677	carbonic anhydrase XIII	CA13	0.43192	3.27e-12	4.4e-12
23632	carbonic anhydrase XIV	CA14	-1.3304	1.56e-36	2.99e-36
762	carbonic anhydrase IV	CA4	1.6204	4.9e-43	1.03e-42
763	carbonic anhydrase VA, mitochondrial	CA5A	-0.46008	3.25e-05	3.84e-05
11238	carbonic anhydrase VB, mitochondrial	CA5B	0.53566	5.35e-22	8.31e-22
766	carbonic anhydrase VII	CA7	4.6421	1.58e-161	3.17e-160
767	carbonic anhydrase VIII	CA8	0.46407	1.77e-09	2.27e-09
768	carbonic anhydrase IX	CA9	-1.3989	1.99e-20	3.03e-20
51719	calcium binding protein 39	CAB39	0.34461	6.73e-20	1.02e-19
81617	calcium binding protein 39-like	CAB39L	0.57466	7.83e-27	1.31e-26
23523	calcineurin binding protein 1	CABIN1	-0.077605	0.032865	0.035706
91768	Cdk5 and Abl enzyme substrate 1	CABLES1	2.2566	2.54e-89	1.08e-88
81928	Cdk5 and Abl enzyme substrate 2	CABLES2	0.72852	7.09e-57	1.82e-56
9478	calcium binding protein 1	CABP1	5.2566	1.43e-199	6.36e-198
57010	calcium binding protein 4	CABP4	-1.3896	1.05e-40	2.13e-40
164633	calcium binding protein 7	CABP7	0.58507	1.95e-10	2.55e-10
26256	calcium binding tyrosine-(Y)-phosphorylation regulated	CABYR	1.4561	7.84e-72	2.53e-71
773	calcium channel, voltage-dependent, P/Q type, alpha 1A subunit	CACNA1A	2.2728	9.72e-106	5.63e-105
774	calcium channel, voltage-dependent, N type, alpha 1B subunit	CACNA1B	4.3919	2.23e-135	2.41e-134
775	calcium channel, voltage-dependent, L type, alpha 1C subunit	CACNA1C	0.77849	2.01e-33	3.68e-33
776	calcium channel, voltage-dependent, L type, alpha 1D subunit	CACNA1D	1.2863	1.71e-53	4.2e-53
777	calcium channel, voltage-dependent, R type, alpha 1E subunit	CACNA1E	2.9134	1.07e-113	7.23e-113
778	calcium channel, voltage-dependent, L type, alpha 1F subunit	CACNA1F	2.7499	8.57e-146	1.19e-144
8913	calcium channel, voltage-dependent, T type, alpha 1G subunit	CACNA1G	2.6082	1.35e-92	6.08e-92
8912	calcium channel, voltage-dependent, T type, alpha 1H subunit	CACNA1H	1.4077	1.41e-51	3.37e-51
8911	calcium channel, voltage-dependent, T type, alpha 1I subunit	CACNA1I	4.2351	6.97e-146	9.68e-145
779	calcium channel, voltage-dependent, L type, alpha 1S subunit	CACNA1S	2.1474	3.17e-57	8.18e-57
781	calcium channel, voltage-dependent, alpha 2/delta subunit 1	CACNA2D1	1.4494	6.63e-51	1.57e-50
9254	calcium channel, voltage-dependent, alpha 2/delta subunit 2	CACNA2D2	1.6619	4.13e-68	1.26e-67
55799	calcium channel, voltage-dependent, alpha 2/delta subunit 3	CACNA2D3	3.2252	2.35e-120	1.82e-119
93589	calcium channel, voltage-dependent, alpha 2/delta subunit 4	CACNA2D4	-1.3548	3.57e-45	7.75e-45
782	calcium channel, voltage-dependent, beta 1 subunit	CACNB1	2.3878	7.41e-153	1.22e-151
783	calcium channel, voltage-dependent, beta 2 subunit	CACNB2	2.2327	5.32e-125	4.57e-124
784	calcium channel, voltage-dependent, beta 3 subunit	CACNB3	2.7447	2.16e-170	5.44e-169
785	calcium channel, voltage-dependent, beta 4 subunit	CACNB4	1.6056	2.1e-77	7.38e-77
786	calcium channel, voltage-dependent, gamma subunit 1	CACNG1	-0.85579	1.82e-13	2.5e-13
10369	calcium channel, voltage-dependent, gamma subunit 2	CACNG2	2.4861	1.53e-45	3.34e-45
10368	calcium channel, voltage-dependent, gamma subunit 3	CACNG3	5.7111	2.88e-142	3.69e-141
27092	calcium channel, voltage-dependent, gamma subunit 4	CACNG4	-2.0625	1.8e-79	6.52e-79
27091	calcium channel, voltage-dependent, gamma subunit 5	CACNG5	2.5156	4.07e-51	9.68e-51
59285	calcium channel, voltage-dependent, gamma subunit 6	CACNG6	-0.64929	4.97e-10	6.45e-10
59284	calcium channel, voltage-dependent, gamma subunit 7	CACNG7	1.0077	1e-53	2.47e-53
59283	calcium channel, voltage-dependent, gamma subunit 8	CACNG8	3.2	9.9e-133	1.01e-131
27101	calcyclin binding protein	CACYBP	0.95696	1.73e-86	7.06e-86
790	carbamoyl-phosphate synthetase 2, aspartate transcarbamylase, and dihydroorotase	CAD	-0.68139	1.64e-53	4.03e-53
253559	cell adhesion molecule 2	CADM2	0.4398	3.78e-09	4.83e-09
57863	cell adhesion molecule 3	CADM3	1.2758	1.25e-37	2.42e-37
199731	cell adhesion molecule 4	CADM4	-0.56896	2.2e-42	4.57e-42
8618	Ca++-dependent secretion activator	CADPS	1.2255	2.12e-30	3.72e-30
93664	Ca++-dependent secretion activator 2	CADPS2	1.736	1.8e-60	4.87e-60
793	calbindin 1, 28kDa	CALB1	2.4514	1.55e-62	4.3e-62
794	calbindin 2	CALB2	3.791	1.75e-108	1.07e-107
796	calcitonin-related polypeptide alpha	CALCA	0.86733	5.24e-07	6.42e-07
797	calcitonin-related polypeptide beta	CALCB	1.0512	1.09e-18	1.62e-18
57658	calcium binding and coiled-coil domain 1	CALCOCO1	0.40888	1.2e-28	2.06e-28
10241	calcium binding and coiled-coil domain 2	CALCOCO2	-0.47798	2.51e-23	3.98e-23
799	calcitonin receptor	CALCR	0.47798	0.0015686	0.0017788
10203	calcitonin receptor-like	CALCRL	-2.8939	6.29e-136	6.9e-135
800	caldesmon 1	CALD1	-0.45101	1.09e-10	1.43e-10
255022	calcium homeostasis modulator 1	CALHM1	4.5505	2.01e-125	1.75e-124
119395	calcium homeostasis modulator 3	CALHM3	2.5235	3.75e-80	1.37e-79
801	calmodulin 1 (phosphorylase kinase, delta)	CALM1	1.6679	4.12e-129	3.88e-128
805	calmodulin 2 (phosphorylase kinase, delta)	CALM2	1.0291	5.92e-103	3.24e-102
808	calmodulin 3 (phosphorylase kinase, delta)	CALM3	1.7791	1.68e-107	1.01e-106
810	calmodulin-like 3	CALML3	2.7115	3.44e-68	1.05e-67
91860	calmodulin-like 4	CALML4	3.8072	0	0
51806	calmodulin-like 5	CALML5	4.2341	6.25e-99	3.19e-98
163688	calmodulin-like 6	CALML6	2.7004	2.61e-107	1.56e-106
83698	calneuron 1	CALN1	1.7713	1.02e-33	1.88e-33
811	calreticulin	CALR	-1.7798	3.53e-168	8.43e-167
813	calumenin	CALU	-1.3054	2e-86	8.13e-86
50632	calcyon neuron-specific vesicular protein	CALY	5.0793	1.84e-150	2.86e-149
8536	calcium/calmodulin-dependent protein kinase I	CAMK1	2.2914	4.82e-226	2.94e-224
57118	calcium/calmodulin-dependent protein kinase ID	CAMK1D	1.857	1.16e-101	6.19e-101
57172	calcium/calmodulin-dependent protein kinase IG	CAMK1G	5.0938	1.02e-150	1.6e-149
815	calcium/calmodulin-dependent protein kinase II alpha	CAMK2A	5.6973	4.13e-177	1.2e-175
816	calcium/calmodulin-dependent protein kinase II beta	CAMK2B	3.2993	1.34e-158	2.52e-157
817	calcium/calmodulin-dependent protein kinase II delta	CAMK2D	-0.17141	0.0038676	0.004329
818	calcium/calmodulin-dependent protein kinase II gamma	CAMK2G	1.6608	1.23e-120	9.59e-120
55450	calcium/calmodulin-dependent protein kinase II inhibitor 1	CAMK2N1	2.8451	3.96e-193	1.56e-191
94032	calcium/calmodulin-dependent protein kinase II inhibitor 2	CAMK2N2	0.99159	3.05e-35	5.73e-35
814	calcium/calmodulin-dependent protein kinase IV	CAMK4	2.8567	3.39e-95	1.61e-94
84254	calcium/calmodulin-dependent protein kinase kinase 1, alpha	CAMKK1	3.2236	7.05e-139	8.43e-138
10645	calcium/calmodulin-dependent protein kinase kinase 2, beta	CAMKK2	2.6928	2.16e-166	4.97e-165
79823	calmodulin-lysine N-methyltransferase	CAMKMT	1.1367	4.62e-82	1.74e-81
79012	CaM kinase-like vesicle-associated	CAMKV	4.1165	5.22e-141	6.51e-140
820	cathelicidin antimicrobial peptide	CAMP	0.49336	0.0093399	0.010339
157922	calmodulin regulated spectrin-associated protein 1	CAMSAP1	0.24348	5.06e-11	6.69e-11
57662	calmodulin regulated spectrin-associated protein family, member 3	CAMSAP3	2.343	1.98e-85	7.91e-85
23261	calmodulin binding transcription activator 1	CAMTA1	1.1438	6.46e-105	3.67e-104
23125	calmodulin binding transcription activator 2	CAMTA2	1.5827	1.24e-135	1.35e-134
55832	cullin-associated and neddylation-dissociated 1	CAND1	-0.18748	9.31e-09	1.18e-08
23066	cullin-associated and neddylation-dissociated 2 (putative)	CAND2	0.61899	3.31e-34	6.13e-34
124583	calcium activated nucleotidase 1	CANT1	-0.86086	3.29e-80	1.21e-79
821	calnexin	CANX	-1.1091	1.42e-115	9.96e-115
10486	CAP, adenylate cyclase-associated protein, 2 (yeast)	CAP2	2.467	1.02e-98	5.17e-98
822	capping protein (actin filament), gelsolin-like	CAPG	-0.87532	9.17e-17	1.33e-16
823	calpain 1, (mu/I) large subunit	CAPN1	0.13804	3.78e-05	4.46e-05
11132	calpain 10	CAPN10	0.8317	1.89e-84	7.44e-84
11131	calpain 11	CAPN11	1.2226	7.5e-23	1.18e-22
147968	calpain 12	CAPN12	1.3358	2.09e-33	3.83e-33
92291	calpain 13	CAPN13	1.9335	3.19e-43	6.72e-43
440854	calpain 14	CAPN14	0.27681	0.0013337	0.0015154
824	calpain 2, (m/II) large subunit	CAPN2	-0.45856	1.56e-21	2.4e-21
825	calpain 3, (p94)	CAPN3	3.1413	8.64e-125	7.4e-124
726	calpain 5	CAPN5	-0.62223	2.45e-22	3.83e-22
388743	calpain 8	CAPN8	1.0489	3.14e-31	5.57e-31
10753	calpain 9	CAPN9	-0.451	1.09e-07	1.35e-07
826	calpain, small subunit 1	CAPNS1	0.53977	6.25e-44	1.33e-43
84290	calpain, small subunit 2	CAPNS2	0.31999	0.018301	0.020059
4076	cell cycle associated protein 1	CAPRIN1	-0.59842	7.98e-77	2.78e-76
65981	caprin family member 2	CAPRIN2	1.5626	1.9e-133	1.96e-132
84698	calcyphosine 2	CAPS2	0.6908	2.48e-37	4.79e-37
133690	calcyphosine-like	CAPSL	1.8876	1.21e-31	2.17e-31
829	capping protein (actin filament) muscle Z-line, alpha 1	CAPZA1	-0.086939	0.031063	0.033781
830	capping protein (actin filament) muscle Z-line, alpha 2	CAPZA2	-0.5291	2.37e-38	4.64e-38
84433	caspase recruitment domain family, member 11	CARD11	-1.006	2.53e-40	5.11e-40
114769	caspase recruitment domain family, member 16	CARD16	-0.86827	1.6e-16	2.3e-16
84674	caspase recruitment domain family, member 6	CARD6	-1.1652	1.77e-45	3.85e-45
22900	caspase recruitment domain family, member 8	CARD8	-0.93705	1.02e-54	2.54e-54
64170	caspase recruitment domain family, member 9	CARD9	-0.7112	8.58e-24	1.37e-23
23589	calcium regulated heat stable protein 1, 24kDa	CARHSP1	-0.82684	8.82e-38	1.71e-37
10498	coactivator-associated arginine methyltransferase 1	CARM1	1.1455	4.71e-134	4.95e-133
57571	carnosine synthase 1	CARNS1	1.2931	9.34e-17	1.35e-16
833	cysteinyl-tRNA synthetase	CARS	-0.32082	4.59e-17	6.68e-17
79587	cysteinyl-tRNA synthetase 2, mitochondrial (putative)	CARS2	0.10157	0.0017275	0.0019557
9607	CART prepropeptide	CARTPT	7.4788	4.86e-142	6.22e-141
55259	cancer susceptibility candidate 1	CASC1	0.70814	1.8e-27	3.03e-27
22794	cancer susceptibility candidate 3	CASC3	-0.12194	0.00051884	0.0005955
113201	cancer susceptibility candidate 4	CASC4	-0.403	6.16e-26	1.01e-25
64921	CAS1 domain containing 1	CASD1	0.33867	5.31e-11	7.02e-11
8573	calcium/calmodulin-dependent serine protein kinase (MAGUK family)	CASK	-1.4785	6.15e-163	1.3e-161
57524	CASK interacting protein 1	CASKIN1	3.1506	1.41e-153	2.38e-152
57513	CASK interacting protein 2	CASKIN2	-0.37038	1.1e-10	1.45e-10
834	caspase 1, apoptosis-related cysteine peptidase	CASP1	-1.4592	2.91e-42	6.04e-42
843	caspase 10, apoptosis-related cysteine peptidase	CASP10	0.2185	0.0010233	0.001166
23581	caspase 14, apoptosis-related cysteine peptidase	CASP14	3.0513	2.26e-59	6e-59
835	caspase 2, apoptosis-related cysteine peptidase	CASP2	-1.0712	1.12e-101	5.98e-101
836	caspase 3, apoptosis-related cysteine peptidase	CASP3	-0.83521	1.57e-67	4.71e-67
837	caspase 4, apoptosis-related cysteine peptidase	CASP4	-1.3536	7.83e-33	1.42e-32
838	caspase 5, apoptosis-related cysteine peptidase	CASP5	-2.2202	1.44e-37	2.78e-37
839	caspase 6, apoptosis-related cysteine peptidase	CASP6	-0.62034	2.12e-22	3.32e-22
840	caspase 7, apoptosis-related cysteine peptidase	CASP7	0.26737	0.00052813	0.00060606
841	caspase 8, apoptosis-related cysteine peptidase	CASP8	-1.1165	1.56e-53	3.84e-53
844	calsequestrin 1 (fast-twitch, skeletal muscle)	CASQ1	0.71502	2.51e-19	3.77e-19
845	calsequestrin 2 (cardiac muscle)	CASQ2	1.6399	5.58e-37	1.07e-36
57091	Cas scaffolding protein family member 4	CASS4	-1.2622	1.18e-44	2.54e-44
831	calpastatin	CAST	-0.1638	0.00014371	0.00016726
54897	castor zinc finger 1	CASZ1	-0.66576	1.71e-15	2.43e-15
847	catalase	CAT	-0.58314	3.23e-24	5.19e-24
117144	cation channel, sperm associated 1	CATSPER1	-0.78304	9.64e-12	1.29e-11
117155	cation channel, sperm associated 2	CATSPER2	0.93824	1.89e-52	4.58e-52
857	caveolin 1, caveolae protein, 22kDa	CAV1	-1.3489	6.52e-36	1.24e-35
858	caveolin 2	CAV2	0.17378	0.026044	0.028386
859	caveolin 3	CAV3	1.0566	2.32e-13	3.18e-13
9139	core-binding factor, runt domain, alpha subunit 2; translocated to, 2	CBFA2T2	0.72969	1.58e-96	7.67e-96
863	core-binding factor, runt domain, alpha subunit 2; translocated to, 3	CBFA2T3	2.5322	1.64e-157	3.04e-156
865	core-binding factor, beta subunit	CBFB	-1.2015	1.31e-70	4.14e-70
867	Cbl proto-oncogene, E3 ubiquitin protein ligase	CBL	-0.53738	1.2e-43	2.54e-43
868	Cbl proto-oncogene, E3 ubiquitin protein ligase B	CBLB	-1.133	1.07e-98	5.43e-98
23624	Cbl proto-oncogene, E3 ubiquitin protein ligase C	CBLC	2.282	5.04e-53	1.23e-52
79872	Cbl proto-oncogene, E3 ubiquitin protein ligase-like 1	CBLL1	-0.7249	1.59e-109	9.97e-109
869	cerebellin 1 precursor	CBLN1	1.2059	2.28e-17	3.32e-17
147381	cerebellin 2 precursor	CBLN2	4.8097	3.31e-138	3.87e-137
643866	cerebellin 3 precursor	CBLN3	2.3384	1.64e-107	9.82e-107
140689	cerebellin 4 precursor	CBLN4	4.5188	3.17e-112	2.08e-111
873	carbonyl reductase 1	CBR1	0.47552	2.61e-09	3.34e-09
84869	carbonyl reductase 4	CBR4	-0.20837	3.07e-07	3.78e-07
875	cystathionine-beta-synthase	CBS	4.5179	5.35e-231	3.48e-229
55871	COBW domain containing 1	CBWD1	0.34378	9.59e-15	1.34e-14
445571	COBW domain containing 3	CBWD3	-0.16812	0.0038877	0.0043512
220869	COBW domain containing 5	CBWD5	-0.15979	0.00079445	0.00090744
644019	COBW domain containing 6	CBWD6	8.4031	0	0
84733	chromobox homolog 2	CBX2	-2.6138	6.43e-138	7.46e-137
11335	chromobox homolog 3	CBX3	-0.88134	1.38e-109	8.66e-109
23468	chromobox homolog 5	CBX5	-0.96001	8.62e-125	7.38e-124
23466	chromobox homolog 6	CBX6	1.6715	8.57e-130	8.16e-129
23492	chromobox homolog 7	CBX7	2.7919	1.88e-192	7.33e-191
57332	chromobox homolog 8	CBX8	-1.4856	1.34e-161	2.69e-160
25776	chibby homolog 1 (Drosophila)	CBY1	-0.65084	3.04e-62	8.39e-62
646019	chibby homolog 3 (Drosophila)	CBY3	-0.57504	9.96e-10	1.28e-09
54862	coiled-coil and C2 domain containing 1A	CC2D1A	0.87736	3.24e-96	1.56e-95
57545	coiled-coil and C2 domain containing 2A	CC2D2A	-0.97967	3.01e-86	1.22e-85
387707	coiled-coil and C2 domain containing 2B	CC2D2B	2.1908	6.36e-98	3.18e-97
147372	collagen and calcium binding EGF domains 1	CCBE1	3.1465	1.9e-88	7.97e-88
1238	chemokine binding protein 2	CCBP2	-0.14209	0.034247	0.037187
92922	coiled-coil domain containing 102A	CCDC102A	-1.0176	3.96e-37	7.63e-37
79839	coiled-coil domain containing 102B	CCDC102B	-1.8415	3.08e-161	6.12e-160
29903	coiled-coil domain containing 106	CCDC106	1.0143	3.6e-100	1.88e-99
203260	coiled-coil domain containing 107	CCDC107	-0.33365	3.91e-13	5.35e-13
256309	coiled-coil domain containing 110	CCDC110	1.6511	1.81e-68	5.55e-68
201973	coiled-coil domain containing 111	CCDC111	-1.314	1.98e-161	3.95e-160
29070	coiled-coil domain containing 113	CCDC113	0.33777	8.85e-12	1.18e-11
93233	coiled-coil domain containing 114	CCDC114	1.408	2.09e-56	5.34e-56
150275	coiled-coil domain containing 117	CCDC117	3.5883	1.6e-267	1.52e-265
79635	coiled-coil domain containing 121	CCDC121	-0.3642	5.66e-11	7.47e-11
160857	coiled-coil domain containing 122	CCDC122	0.53584	1.05e-09	1.36e-09
115098	coiled-coil domain containing 124	CCDC124	0.33892	1.52e-21	2.34e-21
202243	coiled-coil domain containing 125	CCDC125	-0.16169	0.00075345	0.00086126
90693	coiled-coil domain containing 126	CCDC126	-0.15343	0.00010389	0.0001213
152206	coiled-coil domain containing 13	CCDC13	-0.11644	0.012844	0.014141
81576	coiled-coil domain containing 130	CCDC130	0.10148	0.0079217	0.0087905
79879	coiled-coil domain containing 134	CCDC134	-1.3074	2.62e-112	1.73e-111
64753	coiled-coil domain containing 136	CCDC136	1.3515	1.91e-63	5.37e-63
165055	coiled-coil domain containing 138	CCDC138	-1.2785	1.71e-124	1.45e-123
285025	coiled-coil domain containing 141	CCDC141	-1.349	1.07e-39	2.15e-39
84865	coiled-coil domain containing 142	CCDC142	-0.41269	4.84e-27	8.11e-27
9720	coiled-coil domain containing 144A	CCDC144A	2.5891	3.51e-63	9.84e-63
339184	coiled-coil domain containing 144 family, N-terminal like	CCDC144NL	2.7818	1.8e-87	7.43e-87
57639	coiled-coil domain containing 146	CCDC146	0.1611	0.0034219	0.0038368
130940	coiled-coil domain containing 148	CCDC148	0.52381	1.71e-25	2.8e-25
91050	coiled-coil domain containing 149	CCDC149	0.88211	7.2e-123	5.88e-122
80071	coiled-coil domain containing 15	CCDC15	-1.529	2.35e-72	7.64e-72
284992	coiled-coil domain containing 150	CCDC150	-0.68079	2.33e-16	3.35e-16
115948	coiled-coil domain containing 151	CCDC151	0.29085	9.09e-08	1.13e-07
283152	coiled-coil domain containing 153	CCDC153	-0.40025	8.59e-08	1.07e-07
645811	coiled-coil domain containing 154	CCDC154	1.0118	6.52e-26	1.07e-25
550631	coiled-coil domain containing 157	CCDC157	0.70516	7.04e-62	1.93e-61
339965	coiled-coil domain containing 158	CCDC158	0.93422	7.19e-30	1.25e-29
126075	coiled-coil domain containing 159	CCDC159	0.15861	0.00029541	0.00034128
347475	coiled-coil domain containing 160	CCDC160	-1.3584	1.7e-56	4.33e-56
92749	coiled-coil domain containing 164	CCDC164	2.4909	1.63e-59	4.35e-59
100130274	coiled-coil domain containing 166	CCDC166	2.7271	2.2e-85	8.79e-85
154467	coiled-coil domain containing 167	CCDC167	-1.4152	3.42e-119	2.58e-118
643677	coiled-coil domain containing 168	CCDC168	-0.57158	6.35e-06	7.63e-06
728591	coiled-coil domain containing 169	CCDC169	-1.8263	3.48e-76	1.2e-75
343099	coiled-coil domain containing 18	CCDC18	-0.32011	3.86e-07	4.75e-07
149473	coiled-coil domain containing 24	CCDC24	1.564	5.52e-135	5.91e-134
55246	coiled-coil domain containing 25	CCDC25	0.27082	3.09e-19	4.63e-19
25901	coiled-coil domain containing 28A	CCDC28A	1.4399	4.06e-153	6.78e-152
79140	coiled-coil domain containing 28B	CCDC28B	-0.82152	7.46e-67	2.22e-66
83643	coiled-coil domain containing 3	CCDC3	2.4486	2.36e-135	2.55e-134
728621	coiled-coil domain containing 30	CCDC30	0.5608	5.67e-28	9.62e-28
80125	coiled-coil domain containing 33	CCDC33	0.79671	6.11e-08	7.64e-08
91057	coiled-coil domain containing 34	CCDC34	0.51452	8.89e-22	1.38e-21
339834	coiled-coil domain containing 36	CCDC36	0.66574	1.84e-13	2.52e-13
120935	coiled-coil domain containing 38	CCDC38	-0.88593	1.67e-16	2.41e-16
339829	coiled-coil domain containing 39	CCDC39	0.17254	0.0051168	0.0057102
146849	coiled-coil domain containing 42	CCDC42	0.55214	1.21e-05	1.44e-05
124808	coiled-coil domain containing 43	CCDC43	-0.48199	3.23e-69	9.99e-69
57003	coiled-coil domain containing 47	CCDC47	-0.80523	1.17e-106	6.92e-106
79825	coiled-coil domain containing 48	CCDC48	1.2307	1.81e-61	4.96e-61
152137	coiled-coil domain containing 50	CCDC50	-0.87857	6.12e-70	1.92e-69
84692	coiled-coil domain containing 54	CCDC54	0.32917	0.013097	0.014415
284001	coiled-coil domain containing 57	CCDC57	1.117	3.8e-72	1.23e-71
131076	coiled-coil domain containing 58	CCDC58	-0.69152	6.01e-83	2.29e-82
29080	coiled-coil domain containing 59	CCDC59	-0.43981	6.06e-41	1.23e-40
8030	coiled-coil domain containing 6	CCDC6	0.56703	8.67e-41	1.76e-40
160777	coiled-coil domain containing 60	CCDC60	0.76903	1.92e-08	2.42e-08
729440	coiled-coil domain containing 61	CCDC61	0.24954	1.84e-09	2.36e-09
84660	coiled-coil domain containing 62	CCDC62	1.1208	2.08e-76	7.18e-76
85478	coiled-coil domain containing 65	CCDC65	0.97141	2.69e-60	7.24e-60
80323	coiled-coil domain containing 68	CCDC68	2.548	3.03e-136	3.36e-135
26112	coiled-coil domain containing 69	CCDC69	1.1448	6.44e-68	1.95e-67
221016	coiled-coil domain containing 7	CCDC7	0.3561	1.34e-12	1.82e-12
64925	coiled-coil domain containing 71	CCDC71	-1.3979	7.59e-172	1.97e-170
168455	coiled-coil domain containing 71-like	CCDC71L	-1.4889	3.5e-96	1.68e-95
493860	coiled-coil domain containing 73	CCDC73	0.90696	3.12e-23	4.94e-23
90557	coiled-coil domain containing 74A	CCDC74A	1.0727	4.09e-67	1.22e-66
91409	coiled-coil domain containing 74B	CCDC74B	0.17889	0.0011039	0.0012566
253635	coiled-coil domain containing 75	CCDC75	-0.49559	4.76e-44	1.01e-43
54482	coiled-coil domain containing 76	CCDC76	-0.37154	1.01e-16	1.46e-16
84318	coiled-coil domain containing 77	CCDC77	-0.54845	6.51e-38	1.27e-37
124093	coiled-coil domain containing 78	CCDC78	0.46631	4.45e-08	5.59e-08
83987	coiled-coil domain containing 8	CCDC8	0.87283	1.87e-14	2.61e-14
151887	coiled-coil domain containing 80	CCDC80	-4.4987	3.9e-217	2.14e-215
60494	coiled-coil domain containing 81	CCDC81	-0.61387	1.25e-15	1.78e-15
338657	coiled-coil domain containing 84	CCDC84	0.14647	0.0101	0.011165
114800	coiled-coil domain containing 85A	CCDC85A	4.2226	1.76e-164	3.91e-163
11007	coiled-coil domain containing 85B	CCDC85B	2.6702	7.34e-153	1.21e-151
79080	coiled-coil domain containing 86	CCDC86	-1.0666	1.06e-133	1.1e-132
55704	coiled-coil domain containing 88A	CCDC88A	-0.20603	3.54e-07	4.35e-07
283234	coiled-coil domain containing 88B	CCDC88B	0.45982	2.76e-15	3.9e-15
26093	coiled-coil domain containing 9	CCDC9	0.42419	2.5e-24	4.02e-24
63933	coiled-coil domain containing 90A	CCDC90A	0.1546	5.7e-06	6.84e-06
60492	coiled-coil domain containing 90B	CCDC90B	-0.66979	3.75e-77	1.32e-76
55297	coiled-coil domain containing 91	CCDC91	0.67544	4.8e-41	9.78e-41
80212	coiled-coil domain containing 92	CCDC92	1.6912	4.33e-206	2.06e-204
257236	coiled-coil domain containing 96	CCDC96	0.2417	3.82e-06	4.6e-06
90324	coiled-coil domain containing 97	CCDC97	-0.7569	1.87e-95	8.89e-95
54908	coiled-coil domain containing 99	CCDC99	-0.56262	3.99e-40	8.02e-40
885	cholecystokinin	CCK	5.4474	1.79e-152	2.92e-151
886	cholecystokinin A receptor	CCKAR	1.0585	6.58e-12	8.82e-12
887	cholecystokinin B receptor	CCKBR	5.1141	1.55e-156	2.8e-155
6346	chemokine (C-C motif) ligand 1	CCL1	0.76355	8.58e-08	1.07e-07
6361	chemokine (C-C motif) ligand 17	CCL17	-1.7237	5.98e-39	1.18e-38
6363	chemokine (C-C motif) ligand 19	CCL19	-1.051	3.05e-06	3.69e-06
6347	chemokine (C-C motif) ligand 2	CCL2	-2.4672	1.2e-40	2.43e-40
6364	chemokine (C-C motif) ligand 20	CCL20	-1.8633	2.74e-21	4.21e-21
6366	chemokine (C-C motif) ligand 21	CCL21	1.7084	9.62e-30	1.67e-29
6367	chemokine (C-C motif) ligand 22	CCL22	-2.3332	1.83e-47	4.12e-47
6370	chemokine (C-C motif) ligand 25	CCL25	-0.55643	0.00015855	0.0001844
10344	chemokine (C-C motif) ligand 26	CCL26	-1.6947	3.67e-25	5.96e-25
10850	chemokine (C-C motif) ligand 27	CCL27	6.3903	0	0
56477	chemokine (C-C motif) ligand 28	CCL28	2.7816	1.95e-143	2.58e-142
6355	chemokine (C-C motif) ligand 8	CCL8	-2.3593	8.8e-33	1.6e-32
83605	cerebral cavernous malformation 2	CCM2	1.3289	1.18e-152	1.93e-151
8900	cyclin A1	CCNA1	3.4574	9.43e-131	9.23e-130
890	cyclin A2	CCNA2	-1.1602	1.32e-31	2.36e-31
891	cyclin B1	CCNB1	-1.1074	3.39e-37	6.54e-37
9133	cyclin B2	CCNB2	-4.6903	1.04e-158	1.96e-157
85417	cyclin B3	CCNB3	-0.66324	6.24e-16	8.91e-16
595	cyclin D1	CCND1	-1.5896	4.18e-69	1.29e-68
894	cyclin D2	CCND2	-0.73258	1.58e-35	2.99e-35
23582	cyclin D-type binding-protein 1	CCNDBP1	0.8956	1.54e-85	6.16e-85
898	cyclin E1	CCNE1	0.46336	1.74e-21	2.67e-21
9134	cyclin E2	CCNE2	-1.9	2.11e-100	1.1e-99
900	cyclin G1	CCNG1	-0.32706	4.4e-14	6.1e-14
901	cyclin G2	CCNG2	0.67076	9.77e-49	2.24e-48
10983	cyclin I	CCNI	0.35414	3.12e-19	4.67e-19
645121	cyclin I family, member 2	CCNI2	0.67	2.74e-27	4.6e-27
54619	cyclin J	CCNJ	-0.64035	6.23e-47	1.39e-46
8812	cyclin K	CCNK	1.6622	9.7e-152	1.56e-150
81669	cyclin L2	CCNL2	0.7016	6.87e-34	1.26e-33
10309	cyclin O	CCNO	3.417	1.27e-103	7.05e-103
904	cyclin T1	CCNT1	-0.45342	5.52e-44	1.18e-43
9738	centriolar coiled coil protein 110kDa	CCP110	0.62471	2.15e-31	3.83e-31
9236	cell cycle progression 1	CCPG1	2.7523	4.42e-288	5.11e-286
1230	chemokine (C-C motif) receptor 1	CCR1	-2.6855	2.87e-76	9.9e-76
2826	chemokine (C-C motif) receptor 10	CCR10	0.55483	3.03e-22	4.73e-22
729230	chemokine (C-C motif) receptor 2	CCR2	-1.5442	1.86e-17	2.72e-17
1233	chemokine (C-C motif) receptor 4	CCR4	-1.4737	1.48e-24	2.38e-24
1234	chemokine (C-C motif) receptor 5 (gene/pseudogene)	CCR5	-2.5301	2.08e-54	5.17e-54
1235	chemokine (C-C motif) receptor 6	CCR6	6.3667	0	1.23e-306
1236	chemokine (C-C motif) receptor 7	CCR7	0.35412	0.0066857	0.0074329
10803	chemokine (C-C motif) receptor 9	CCR9	1.4379	1.9e-26	3.16e-26
51554	chemokine (C-C motif) receptor-like 1	CCRL1	-0.83793	1.18e-10	1.55e-10
9034	chemokine (C-C motif) receptor-like 2	CCRL2	-1.5594	2.9e-56	7.37e-56
9973	copper chaperone for superoxide dismutase	CCS	-0.10232	0.013711	0.01509
10576	chaperonin containing TCP1, subunit 2 (beta)	CCT2	-0.67451	6.47e-50	1.51e-49
7203	chaperonin containing TCP1, subunit 3 (gamma)	CCT3	-0.91001	5.27e-123	4.32e-122
10575	chaperonin containing TCP1, subunit 4 (delta)	CCT4	-0.46089	1.22e-37	2.36e-37
22948	chaperonin containing TCP1, subunit 5 (epsilon)	CCT5	-1.061	5.3e-103	2.9e-102
908	chaperonin containing TCP1, subunit 6A (zeta 1)	CCT6A	-0.66942	7.22e-47	1.61e-46
10693	chaperonin containing TCP1, subunit 6B (zeta 2)	CCT6B	-0.6235	1.23e-16	1.77e-16
10574	chaperonin containing TCP1, subunit 7 (eta)	CCT7	-0.67931	1.12e-96	5.43e-96
9398	CD101 molecule	CD101	-0.25638	0.00084024	0.00095926
135228	CD109 molecule	CD109	-0.32193	0.00013791	0.00016062
929	CD14 molecule	CD14	-2.5821	2.73e-76	9.42e-76
977	CD151 molecule (Raph blood group)	CD151	-1.3241	5.19e-74	1.73e-73
11126	CD160 molecule	CD160	-0.68453	8.16e-18	1.2e-17
9332	CD163 molecule	CD163	-2.6787	8.43e-43	1.76e-42
283316	CD163 molecule-like 1	CD163L1	0.42597	1.35e-05	1.61e-05
8763	CD164 molecule, sialomucin	CD164	-0.63538	3.88e-40	7.82e-40
388611	CD164 sialomucin-like 2	CD164L2	3.3707	9.4e-115	6.5e-114
4064	CD180 molecule	CD180	-2.9657	1.32e-88	5.54e-88
930	CD19 molecule	CD19	-0.71739	1.15e-10	1.51e-10
912	CD1d molecule	CD1D	-1.8434	9.33e-56	2.36e-55
914	CD2 molecule	CD2	-2.1391	1.02e-31	1.82e-31
4345	CD200 molecule	CD200	1.2628	1.82e-59	4.83e-59
131450	CD200 receptor 1	CD200R1	1.3057	2.72e-36	5.18e-36
50489	CD207 molecule, langerin	CD207	-3.6873	8.37e-99	4.27e-98
30835	CD209 molecule	CD209	-0.78467	1.42e-07	1.76e-07
933	CD22 molecule	CD22	2.6474	4.33e-63	1.21e-62
10666	CD226 molecule	CD226	-2.3617	1.32e-98	6.71e-98
51744	CD244 molecule, natural killer cell receptor 2B4	CD244	0.37331	0.00078706	0.00089908
919	CD247 molecule	CD247	1.6482	1.34e-98	6.8e-98
57124	CD248 molecule, endosialin	CD248	-0.48554	2.25e-05	2.66e-05
80381	CD276 molecule	CD276	-1.28	3.64e-82	1.37e-81
940	CD28 molecule	CD28	-1.5167	7.35e-21	1.12e-20
23607	CD2-associated protein	CD2AP	-0.17954	1.02e-05	1.22e-05
11314	CD300a molecule	CD300A	-2.2182	1.89e-70	5.98e-70
10871	CD300c molecule	CD300C	-2.7047	9.25e-83	3.52e-82
342510	CD300e molecule	CD300E	0.89231	1.01e-08	1.28e-08
124599	CD300 molecule-like family member b	CD300LB	-1.5562	1.58e-26	2.62e-26
146722	CD300 molecule-like family member f	CD300LF	-2.4101	2.5e-64	7.15e-64
146894	CD300 molecule-like family member g	CD300LG	-0.78837	2.25e-08	2.84e-08
51293	CD320 molecule	CD320	-0.84064	3.62e-78	1.29e-77
945	CD33 molecule	CD33	-2.6912	3.96e-89	1.68e-88
948	CD36 molecule (thrombospondin receptor)	CD36	-0.81643	1.05e-14	1.47e-14
951	CD37 molecule	CD37	-2.4945	1.21e-96	5.91e-96
952	CD38 molecule	CD38	-1.9645	2.13e-53	5.23e-53
915	CD3d molecule, delta (CD3-TCR complex)	CD3D	-1.9109	5.56e-29	9.57e-29
916	CD3e molecule, epsilon (CD3-TCR complex)	CD3E	-1.7426	3.34e-28	5.67e-28
10849	CD3e molecule, epsilon associated protein	CD3EAP	0.10499	0.0037443	0.0041927
917	CD3g molecule, gamma (CD3-TCR complex)	CD3G	-1.7882	6.05e-31	1.07e-30
920	CD4 molecule	CD4	-1.5933	3.52e-68	1.07e-67
958	CD40 molecule, TNF receptor superfamily member 5	CD40	0.15153	0.042614	0.046105
960	CD44 molecule (Indian blood group)	CD44	-4.2883	1.34e-111	8.63e-111
4179	CD46 molecule, complement regulatory protein	CD46	0.62791	6.8e-50	1.59e-49
961	CD47 molecule	CD47	0.3921	2.34e-20	3.55e-20
962	CD48 molecule	CD48	-2.7163	1.35e-61	3.7e-61
921	CD5 molecule	CD5	0.75977	6.15e-16	8.79e-16
963	CD53 molecule	CD53	-1.5765	8.27e-53	2.02e-52
1604	CD55 molecule, decay accelerating factor for complement (Cromer blood group)	CD55	0.92584	1.65e-44	3.54e-44
965	CD58 molecule	CD58	-0.67892	1.55e-15	2.2e-15
922	CD5 molecule-like	CD5L	-2.7559	1.38e-49	3.2e-49
923	CD6 molecule	CD6	1.7543	3.8e-62	1.05e-61
967	CD63 molecule	CD63	-1.0888	2.15e-66	6.34e-66
968	CD68 molecule	CD68	2.994	1.29e-120	1e-119
969	CD69 molecule	CD69	-1.428	1.15e-20	1.75e-20
924	CD7 molecule	CD7	-0.85943	9.19e-14	1.27e-13
970	CD70 molecule	CD70	-1.0591	3.36e-10	4.38e-10
971	CD72 molecule	CD72	-0.40046	2.32e-07	2.86e-07
972	CD74 molecule, major histocompatibility complex, class II invariant chain	CD74	-2.6295	4.29e-80	1.56e-79
973	CD79a molecule, immunoglobulin-associated alpha	CD79A	-0.78886	1.83e-13	2.51e-13
941	CD80 molecule	CD80	-1.8721	3.69e-32	6.64e-32
975	CD81 molecule	CD81	-0.88744	7.53e-62	2.07e-61
3732	CD82 molecule	CD82	-1.8094	1.45e-108	8.87e-108
9308	CD83 molecule	CD83	0.81409	2.37e-34	4.39e-34
8832	CD84 molecule	CD84	-2.833	2.43e-98	1.23e-97
942	CD86 molecule	CD86	-2.8811	2.28e-91	1.01e-90
925	CD8a molecule	CD8A	2.3058	1.09e-101	5.83e-101
926	CD8b molecule	CD8B	-0.81892	3.31e-08	4.16e-08
928	CD9 molecule	CD9	-1.7796	2.46e-102	1.33e-101
22918	CD93 molecule	CD93	-2.1419	2.13e-44	4.58e-44
10225	CD96 molecule	CD96	-0.65352	5.47e-07	6.71e-07
4267	CD99 molecule	CD99	-2.0798	3.72e-72	1.21e-71
83692	CD99 molecule-like 2	CD99L2	0.83707	5.03e-61	1.37e-60
81602	cytidine and dCMP deaminase domain containing 1	CDADC1	0.62158	5.42e-87	2.22e-86
146059	congenital dyserythropoietic anemia, type I	CDAN1	0.34924	2.9e-23	4.59e-23
8556	CDC14 cell division cycle 14 homolog A (S. cerevisiae)	CDC14A	0.2411	0.0010529	0.0011993
991	cell division cycle 20 homolog (S. cerevisiae)	CDC20	-3.2996	3.14e-109	1.95e-108
8697	cell division cycle 23 homolog (S. cerevisiae)	CDC23	-0.62941	2.9e-121	2.3e-120
993	cell division cycle 25 homolog A (S. pombe)	CDC25A	-1.8002	2.41e-97	1.19e-96
994	cell division cycle 25 homolog B (S. pombe)	CDC25B	-0.18579	2.91e-06	3.52e-06
995	cell division cycle 25 homolog C (S. pombe)	CDC25C	-2.8519	2.1e-92	9.48e-92
246184	cell division cycle 26 homolog (S. cerevisiae)	CDC26	-0.39577	4.9e-31	8.68e-31
996	cell division cycle 27 homolog (S. cerevisiae)	CDC27	-0.099099	0.00095682	0.0010913
11140	cell division cycle 37 homolog (S. cerevisiae)	CDC37	0.54763	1.68e-60	4.55e-60
55664	cell division cycle 37 homolog (S. cerevisiae)-like 1	CDC37L1	0.6375	2.65e-53	6.5e-53
51362	cell division cycle 40 homolog (S. cerevisiae)	CDC40	0.44829	1.23e-19	1.85e-19
998	cell division cycle 42 (GTP binding protein, 25kDa)	CDC42	-0.22833	1.42e-08	1.8e-08
8476	CDC42 binding protein kinase alpha (DMPK-like)	CDC42BPA	0.85107	2.18e-108	1.33e-107
9578	CDC42 binding protein kinase beta (DMPK-like)	CDC42BPB	0.74961	6.48e-76	2.22e-75
55561	CDC42 binding protein kinase gamma (DMPK-like)	CDC42BPG	0.37992	3.55e-05	4.19e-05
11135	CDC42 effector protein (Rho GTPase binding) 1	CDC42EP1	-1.4965	1.07e-60	2.89e-60
10435	CDC42 effector protein (Rho GTPase binding) 2	CDC42EP2	0.2341	0.00026348	0.00030471
10602	CDC42 effector protein (Rho GTPase binding) 3	CDC42EP3	0.57074	2.33e-22	3.64e-22
23580	CDC42 effector protein (Rho GTPase binding) 4	CDC42EP4	-0.68249	1.47e-21	2.27e-21
148170	CDC42 effector protein (Rho GTPase binding) 5	CDC42EP5	0.60083	9.32e-11	1.23e-10
56882	CDC42 small effector 1	CDC42SE1	-0.78129	9.04e-106	5.24e-105
[truncated: 10,524 more rows]

## Sheet: Table S2
Table S2: Significantly dysregulated cell surface genes in TCGA GBM tissues vs. GTEx normal brain tissues
EntrezID	Gene name	Symbols	log2 fold change	P-value	Adj. P-value	Main class
256987	serine incorporator 5	SERINC5	-4.918	5.76e-305	7.88e-303	Transporters
2587	galanin receptor 1	GALR1	-4.412	2.61e-130	2.52e-129	Receptors
10261	immunoglobulin superfamily, member 6	IGSF6	-4.3176	2.11e-164	4.67e-163	Receptors
960	CD44 molecule (Indian blood group)	CD44	-4.2883	1.34e-111	8.63e-111	Unclassified
2149	coagulation factor II (thrombin) receptor	F2R	-4.2771	6.91e-229	4.38e-227	Receptors
2359	formyl peptide receptor 3	FPR3	-4.1279	2.67e-86	1.08e-85	Receptors
219855	solute carrier family 37 (glycerol-3-phosphate transporter), member 2	SLC37A2	-4.1074	3.77e-194	1.51e-192	Transporters
944	tumor necrosis factor (ligand) superfamily, member 8	TNFSF8	-3.9321	5.27e-98	2.64e-97	Unclassified
27197	G protein-coupled receptor 82	GPR82	-3.9185	1.34e-83	5.19e-83	Receptors
7412	vascular cell adhesion molecule 1	VCAM1	-3.7527	8.47e-102	4.56e-101	Unclassified
54209	triggering receptor expressed on myeloid cells 2	TREM2	-3.6524	3.39e-124	2.85e-123	Receptors
4481	macrophage scavenger receptor 1	MSR1	-3.504	7.85e-84	3.05e-83	Receptors
2857	G protein-coupled receptor 34	GPR34	-3.4608	3.36e-114	2.3e-113	Receptors
8477	G protein-coupled receptor 65	GPR65	-3.4016	7.8e-88	3.24e-87	Receptors
3117	major histocompatibility complex, class II, DQ alpha 1	HLA-DQA1	-3.3182	7.23e-75	2.44e-74	Miscellaneous
6402	selectin L	SELL	-3.306	1.09e-87	4.53e-87	Receptors
3604	tumor necrosis factor receptor superfamily, member 9	TNFRSF9	-3.297	4.77e-102	2.57e-101	Receptors
8082	sarcospan (Kras oncogene-associated gene)	SSPN	-3.2467	1.78e-162	3.71e-161	Unclassified
64231	membrane-spanning 4-domains, subfamily A, member 6A	MS4A6A	-3.1533	9.96e-73	3.26e-72	Miscellaneous
7253	thyroid stimulating hormone receptor	TSHR	-3.1452	2.1e-70	6.62e-70	Receptors
719	complement component 3a receptor 1	C3AR1	-3.119	2.96e-96	1.43e-95	Receptors
55584	cholinergic receptor, nicotinic, alpha 9 (neuronal)	CHRNA9	-3.1113	3.2e-50	7.5e-50	Transporters
3122	major histocompatibility complex, class II, DR alpha	HLA-DRA	-3.1014	1.62e-80	5.96e-80	Miscellaneous
3689	integrin, beta 2 (complement component 3 receptor 3 and 4 subunit)	ITGB2	-3.0723	1.41e-108	8.63e-108	Receptors
9154	solute carrier family 28 (sodium-coupled nucleoside transporter), member 1	SLC28A1	-3.0502	2.34e-80	8.6e-80	Transporters
29930	protocadherin beta 1	PCDHB1	-3.048	2.77e-81	1.03e-80	Miscellaneous
9194	solute carrier family 16, member 7 (monocarboxylic acid transporter 2)	SLC16A7	-3.027	2.28e-126	2.01e-125	Transporters
51284	toll-like receptor 7	TLR7	-2.9943	6.52e-90	2.81e-89	Receptors
4064	CD180 molecule	CD180	-2.9657	1.32e-88	5.54e-88	Receptors
1524	chemokine (C-X3-C motif) receptor 1	CX3CR1	-2.9549	3.44e-80	1.26e-79	Receptors
375323	lipoma HMGIC fusion partner-like 4	LHFPL4	-2.9504	7.02e-106	4.08e-105	Miscellaneous
3118	major histocompatibility complex, class II, DQ alpha 2	HLA-DQA2	-2.9101	4.44e-35	8.33e-35	Miscellaneous
1956	epidermal growth factor receptor	EGFR	-2.9055	5.48e-105	3.12e-104	Receptors
10203	calcitonin receptor-like	CALCRL	-2.8939	6.29e-136	6.9e-135	Receptors
942	CD86 molecule	CD86	-2.8811	2.28e-91	1.01e-90	Miscellaneous
4323	matrix metallopeptidase 14 (membrane-inserted)	MMP14	-2.8445	2.97e-106	1.74e-105	Enzymes
154664	ATP-binding cassette, sub-family A (ABC1), member 13	ABCA13	-2.8411	8.11e-54	2e-53	Transporters
3559	interleukin 2 receptor, alpha	IL2RA	-2.8392	3.16e-44	6.77e-44	Receptors
27181	sialic acid binding Ig-like lectin 8	SIGLEC8	-2.8372	1.72e-87	7.1e-87	Miscellaneous
3109	major histocompatibility complex, class II, DM beta	HLA-DMB	-2.8368	9.19e-89	3.89e-88	Miscellaneous
8832	CD84 molecule	CD84	-2.833	2.43e-98	1.23e-97	Unclassified
3111	major histocompatibility complex, class II, DO alpha	HLA-DOA	-2.8191	1.19e-81	4.45e-81	Miscellaneous
552	arginine vasopressin receptor 1A	AVPR1A	-2.8137	6.91e-84	2.69e-83	Receptors
353174	zinc activated ligand-gated ion channel	ZACN	-2.8081	1.04e-128	9.65e-128	Transporters
80380	programmed cell death 1 ligand 2	PDCD1LG2	-2.8072	5.15e-71	1.64e-70	Unclassified
6510	solute carrier family 1 (neutral amino acid transporter), member 5	SLC1A5	-2.7961	5.21e-105	2.97e-104	Transporters
27180	sialic acid binding Ig-like lectin 9	SIGLEC9	-2.7837	5.11e-62	1.41e-61	Miscellaneous
84888	signal peptide peptidase like 2A	SPPL2A	-2.7792	1.5e-227	9.35e-226	Unclassified
126364	leucine rich repeat containing 25	LRRC25	-2.7611	4.1e-84	1.6e-83	Miscellaneous
5724	platelet-activating factor receptor	PTAFR	-2.7494	1.98e-110	1.26e-109	Receptors
55640	feline leukemia virus subgroup C cellular receptor family, member 2	FLVCR2	-2.7481	5.74e-138	6.68e-137	Unclassified
962	CD48 molecule	CD48	-2.7163	1.35e-61	3.7e-61	Unclassified
55504	tumor necrosis factor receptor superfamily, member 19	TNFRSF19	-2.7061	8.21e-147	1.16e-145	Receptors
10871	CD300c molecule	CD300C	-2.7047	9.25e-83	3.52e-82	Receptors
3127	major histocompatibility complex, class II, DR beta 5	HLA-DRB5	-2.6978	3.6e-63	1.01e-62	Miscellaneous
945	CD33 molecule	CD33	-2.6912	3.96e-89	1.68e-88	Miscellaneous
1230	chemokine (C-C motif) receptor 1	CCR1	-2.6855	2.87e-76	9.9e-76	Receptors
51311	toll-like receptor 8	TLR8	-2.683	4.31e-50	1.01e-49	Receptors
9332	CD163 molecule	CD163	-2.6787	8.43e-43	1.76e-42	Unclassified
1436	colony stimulating factor 1 receptor	CSF1R	-2.6428	3.96e-95	1.87e-94	Receptors
140738	transmembrane protein 37	TMEM37	-2.6373	1.54e-99	7.93e-99	Transporters
972	CD74 molecule, major histocompatibility complex, class II invariant chain	CD74	-2.6295	4.29e-80	1.56e-79	Unclassified
5028	purinergic receptor P2Y, G-protein coupled, 1	P2RY1	-2.6288	6.91e-84	2.69e-83	Receptors
2209	Fc fragment of IgG, high affinity Ia, receptor (CD64)	FCGR1A	-2.6263	9.27e-59	2.44e-58	Receptors
89790	sialic acid binding Ig-like lectin 10	SIGLEC10	-2.6127	8.34e-96	3.99e-95	Miscellaneous
3119	major histocompatibility complex, class II, DQ beta 1	HLA-DQB1	-2.5858	6.79e-58	1.76e-57	Miscellaneous
56413	leukotriene B4 receptor 2	LTB4R2	-2.5587	4.81e-124	4.04e-123	Receptors
943	tumor necrosis factor receptor superfamily, member 8	TNFRSF8	-2.5573	9.13e-54	2.25e-53	Receptors
1240	chemokine-like receptor 1	CMKLR1	-2.5561	9.37e-116	6.62e-115	Receptors
1234	chemokine (C-C motif) receptor 5 (gene/pseudogene)	CCR5	-2.5301	2.08e-54	5.17e-54	Unclassified
2357	formyl peptide receptor 1	FPR1	-2.5295	2.03e-49	4.69e-49	Receptors
19	ATP-binding cassette, sub-family A (ABC1), member 1	ABCA1	-2.5071	2.42e-134	2.56e-133	Transporters
951	CD37 molecule	CD37	-2.4945	1.21e-96	5.91e-96	Miscellaneous
1438	colony stimulating factor 2 receptor, alpha, low-affinity (granulocyte-macrophage)	CSF2RA	-2.4895	4.54e-92	2.04e-91	Receptors
2214	Fc fragment of IgG, low affinity IIIa, receptor (CD16a)	FCGR3A	-2.4833	1.71e-46	3.78e-46	Receptors
50615	interleukin 21 receptor	IL21R	-2.4642	9.07e-56	2.29e-55	Receptors
286530	purinergic receptor P2Y, G-protein coupled, 8	P2RY8	-2.4569	1.99e-54	4.94e-54	Receptors
64805	purinergic receptor P2Y, G-protein coupled, 12	P2RY12	-2.4479	4.6e-61	1.25e-60	Receptors
5803	protein tyrosine phosphatase, receptor-type, Z polypeptide 1	PTPRZ1	-2.4407	5.35e-115	3.71e-114	Receptors
3113	major histocompatibility complex, class II, DP alpha 1	HLA-DPA1	-2.4315	6.55e-68	1.99e-67	Miscellaneous
3115	major histocompatibility complex, class II, DP beta 1	HLA-DPB1	-2.4291	9.58e-84	3.72e-83	Miscellaneous
2012	epithelial membrane protein 1	EMP1	-2.4162	6.35e-53	1.55e-52	Miscellaneous
146722	CD300 molecule-like family member f	CD300LF	-2.4101	2.5e-64	7.15e-64	Receptors
6570	solute carrier family 18 (vesicular monoamine), member 1	SLC18A1	-2.3929	6.35e-43	1.33e-42	Transporters
1630	deleted in colorectal carcinoma	DCC	-2.3893	5.93e-90	2.56e-89	Receptors
4804	nerve growth factor receptor	NGFR	-2.3887	7.36e-58	1.91e-57	Receptors
358	aquaporin 1 (Colton blood group)	AQP1	-2.3807	2.24e-43	4.72e-43	Transporters
3903	leukocyte-associated immunoglobulin-like receptor 1	LAIR1	-2.3789	3.45e-67	1.03e-66	Unclassified
10666	CD226 molecule	CD226	-2.3617	1.32e-98	6.71e-98	Receptors
7096	toll-like receptor 1	TLR1	-2.3002	1.68e-79	6.07e-79	Receptors
3123	major histocompatibility complex, class II, DR beta 1	HLA-DRB1	-2.2991	3.49e-63	9.79e-63	Miscellaneous
23432	G protein-coupled receptor 161	GPR161	-2.2894	2.17e-213	1.14e-211	Receptors
140	adenosine A3 receptor	ADORA3	-2.2888	1.49e-80	5.5e-80	0
57121	lysophosphatidic acid receptor 5	LPAR5	-2.2879	6.06e-81	2.24e-80	Receptors
2150	coagulation factor II (thrombin) receptor-like 1	F2RL1	-2.2805	2.48e-63	6.98e-63	Receptors
2846	lysophosphatidic acid receptor 4	LPAR4	-2.2652	2.69e-57	6.94e-57	Receptors
6404	selectin P ligand	SELPLG	-2.2631	2.9e-87	1.19e-86	Unclassified
3108	major histocompatibility complex, class II, DM alpha	HLA-DMA	-2.2535	1.15e-85	4.63e-85	Miscellaneous
780	discoidin domain receptor tyrosine kinase 1	DDR1	-2.2503	1.04e-143	1.39e-142	Receptors
143458	low density lipoprotein receptor class A domain containing 3	LDLRAD3	-2.2437	4.37e-164	9.48e-163	Unclassified
2212	Fc fragment of IgG, low affinity IIa, receptor (CD32)	FCGR2A	-2.2216	2.73e-52	6.59e-52	Receptors
284266	sialic acid binding Ig-like lectin 15	SIGLEC15	-2.2215	3.39e-68	1.04e-67	Miscellaneous
11314	CD300a molecule	CD300A	-2.2182	1.89e-70	5.98e-70	Receptors
1013	cadherin 15, type 1, M-cadherin (myotubule)	CDH15	-2.205	1.65e-38	3.24e-38	Miscellaneous
7105	tetraspanin 6	TSPAN6	-2.1732	1.46e-151	2.35e-150	Miscellaneous
9902	mannose receptor, C type 2	MRC2	-2.1658	1.19e-99	6.17e-99	Receptors
84868	hepatitis A virus cellular receptor 2	HAVCR2	-2.1614	7.84e-88	3.26e-87	Unclassified
22918	CD93 molecule	CD93	-2.1419	2.13e-44	4.58e-44	Unclassified
914	CD2 molecule	CD2	-2.1391	1.02e-31	1.82e-31	Unclassified
391059	ferric-chelate reductase 1	FRRS1	-2.1325	1.7e-46	3.76e-46	Unclassified
2205	Fc fragment of IgE, high affinity I, receptor for; alpha polypeptide	FCER1A	-2.1287	1.96e-28	3.35e-28	Receptors
2700	gap junction protein, alpha 3, 46kDa	GJA3	-2.1274	9.66e-28	1.63e-27	Miscellaneous
7098	toll-like receptor 3	TLR3	-2.11	3.42e-92	1.54e-91	Receptors
8828	neuropilin 2	NRP2	-2.1081	5.37e-142	6.86e-141	Receptors
58191	chemokine (C-X-C motif) ligand 16	CXCL16	-2.0665	2.07e-105	1.19e-104	Receptors
27240	signaling threshold regulating transmembrane adaptor 1	SIT1	-2.0649	6.1e-41	1.24e-40	Unclassified
27092	calcium channel, voltage-dependent, gamma subunit 4	CACNG4	-2.0625	1.8e-79	6.52e-79	Transporters
347735	serine incorporator 2	SERINC2	-2.051	1.77e-66	5.23e-66	Transporters
5795	protein tyrosine phosphatase, receptor type, J	PTPRJ	-2.0484	6.17e-185	2.07e-183	Receptors
8170	solute carrier family 14 (urea transporter), member 2	SLC14A2	-2.0476	9.35e-41	1.9e-40	Transporters
53829	purinergic receptor P2Y, G-protein coupled, 13	P2RY13	-2.0441	6.56e-65	1.89e-64	Receptors
56114	protocadherin gamma subfamily A, 1	PCDHGA1	-2.0385	1.41e-77	4.97e-77	0
7046	transforming growth factor, beta receptor 1	TGFBR1	-2.034	6.61e-137	7.47e-136	Receptors
150372	NFAT activating protein with ITAM motif 1	NFAM1	-2.0002	3.17e-83	1.22e-82	Unclassified
111	adenylate cyclase 5	ADCY5	2.0011	2.8e-109	1.74e-108	Enzymes
56302	transient receptor potential cation channel, subfamily V, member 5	TRPV5	2.0136	1.08e-38	2.12e-38	Transporters
2850	G protein-coupled receptor 27	GPR27	2.0142	3.91e-67	1.17e-66	Receptors
2261	fibroblast growth factor receptor 3	FGFR3	2.0149	1.49e-55	3.76e-55	Receptors
23620	neurotensin receptor 2	NTSR2	2.0202	4.52e-35	8.46e-35	Receptors
26280	interleukin 1 receptor accessory protein-like 2	IL1RAPL2	2.0313	5.38e-30	9.37e-30	Receptors
5310	polycystic kidney disease 1 (autosomal dominant)	PKD1	2.0321	1.01e-141	1.28e-140	Transporters
55356	solute carrier family 22, member 15	SLC22A15	2.0346	2.13e-88	8.96e-88	Transporters
203859	anoctamin 5	ANO5	2.0347	1.91e-78	6.83e-78	Miscellaneous
81285	olfactory receptor, family 51, subfamily E, member 2	OR51E2	2.0456	9.17e-34	1.69e-33	Receptors
143662	mucin 15, cell surface associated	MUC15	2.0569	3.16e-47	7.1e-47	Unclassified
6401	selectin E	SELE	2.0583	7.58e-22	1.18e-21	Receptors
23017	Fas apoptotic inhibitory molecule 2	FAIM2	2.0702	1.38e-106	8.16e-106	Unclassified
26033	attractin-like 1	ATRNL1	2.0709	8.86e-66	2.59e-65	Unclassified
2044	EPH receptor A5	EPHA5	2.0738	2.2e-50	5.18e-50	Receptors
1380	complement component (3d/Epstein Barr virus) receptor 2	CR2	2.0778	6e-44	1.28e-43	Unclassified
64218	sema domain, immunoglobulin domain (Ig), transmembrane domain (TM) and short cytoplasmic domain, (semaphorin) 4A	SEMA4A	2.0785	3.34e-114	2.29e-113	Miscellaneous
7162	trophoblast glycoprotein	TPBG	2.0809	2.84e-45	6.18e-45	Miscellaneous
116534	MAS-related GPR, member E	MRGPRE	2.0883	9.45e-44	2e-43	Receptors
154215	Na+/K+ transporting ATPase interacting 2	NKAIN2	2.0917	5.11e-61	1.39e-60	Transporters
10548	transmembrane 9 superfamily member 1	TM9SF1	2.1157	1.3e-238	9.01e-237	Miscellaneous
221391	opsin 5	OPN5	2.119	2.45e-53	6e-53	Receptors
10501	sema domain, transmembrane domain (TM), and cytoplasmic domain, (semaphorin) 6B	SEMA6B	2.124	1.23e-115	8.64e-115	Miscellaneous
623	bradykinin receptor B1	BDKRB1	2.1349	1.17e-50	2.76e-50	Receptors
9290	G protein-coupled receptor 55	GPR55	2.1397	4.17e-83	1.6e-82	Receptors
4992	olfactory receptor, family 1, subfamily F, member 1	OR1F1	2.1397	2.26e-43	4.77e-43	Receptors
9390	solute carrier family 22 (organic anion transporter), member 13	SLC22A13	2.1412	8.77e-69	2.7e-68	Transporters
25769	solute carrier family 24 (sodium/potassium/calcium exchanger), member 2	SLC24A2	2.146	2.29e-71	7.36e-71	Transporters
362	aquaporin 5	AQP5	2.1523	4.04e-35	7.58e-35	Transporters
81491	G protein-coupled receptor 63	GPR63	2.1537	1.17e-97	5.81e-97	Receptors
419	ADP-ribosyltransferase 3	ART3	2.1642	1.2e-70	3.8e-70	Enzymes
53832	interleukin 20 receptor, alpha	IL20RA	2.1662	2.66e-60	7.16e-60	Receptors
8326	frizzled family receptor 9	FZD9	2.1885	8.36e-122	6.71e-121	Receptors
343	aquaporin 8	AQP8	2.226	9.6e-89	4.06e-88	Transporters
392309	olfactory receptor, family 13, subfamily J, member 1	OR13J1	2.229	2.61e-96	1.26e-95	Receptors
1823	desmocollin 1	DSC1	2.2297	1.48e-70	4.69e-70	Miscellaneous
284521	olfactory receptor, family 2, subfamily L, member 13	OR2L13	2.237	1.03e-42	2.14e-42	Receptors
6335	sodium channel, voltage-gated, type IX, alpha subunit	SCN9A	2.2405	3.79e-61	1.03e-60	Transporters
114815	sortilin-related VPS10 domain containing receptor 1	SORCS1	2.2577	3.32e-86	1.35e-85	Receptors
347051	solute carrier family 10 (sodium/bile acid cotransporter family), member 5	SLC10A5	2.2591	3.82e-149	5.75e-148	Transporters
148066	zinc and ring finger 4	ZNRF4	2.2694	4.17e-64	1.19e-63	Unclassified
1137	cholinergic receptor, nicotinic, alpha 4 (neuronal)	CHRNA4	2.288	1.39e-68	4.26e-68	Transporters
28231	solute carrier organic anion transporter family, member 4A1	SLCO4A1	2.2979	4.26e-72	1.38e-71	Transporters
6010	rhodopsin	RHO	2.3051	2.15e-34	3.99e-34	Receptors
925	CD8a molecule	CD8A	2.3058	1.09e-101	5.83e-101	Unclassified
6331	sodium channel, voltage-gated, type V, alpha subunit	SCN5A	2.3106	1.04e-88	4.38e-88	Transporters
3714	jagged 2	JAG2	2.3172	7.28e-197	3.04e-195	Miscellaneous
340547	V-set and immunoglobulin domain containing 1	VSIG1	2.3179	7.95e-89	3.37e-88	Miscellaneous
8001	glycine receptor, alpha 3	GLRA3	2.3239	1.21e-37	2.34e-37	Transporters
147	adrenergic, alpha-1B-, receptor	ADRA1B	2.3245	2.91e-88	1.22e-87	Receptors
54716	solute carrier family 6 (proline IMINO transporter), member 20	SLC6A20	2.3394	4.82e-56	1.22e-55	Transporters
2045	EPH receptor A7	EPHA7	2.3402	1.14e-76	3.95e-76	Receptors
2903	glutamate receptor, ionotropic, N-methyl D-aspartate 2A	GRIN2A	2.3443	3.98e-50	9.34e-50	Transporters
84623	kin of IRRE like 3 (Drosophila)	KIRREL3	2.3462	4.28e-93	1.95e-92	Miscellaneous
128674	prokineticin receptor 2	PROKR2	2.3551	4.94e-33	9e-33	Receptors
2843	G protein-coupled receptor 20	GPR20	2.3708	4.12e-60	1.11e-59	Receptors
8111	G protein-coupled receptor 68	GPR68	2.3711	4.3e-86	1.74e-85	Receptors
9080	claudin 9	CLDN9	2.3745	1.7e-93	7.83e-93	Miscellaneous
1016	cadherin 18, type 2	CDH18	2.3879	1.57e-45	3.42e-45	Miscellaneous
10653	serine peptidase inhibitor, Kunitz type, 2	SPINT2	2.3972	8.12e-166	1.84e-164	Unclassified
2905	glutamate receptor, ionotropic, N-methyl D-aspartate 2C	GRIN2C	2.4015	6.85e-76	2.34e-75	Transporters
10242	potassium large conductance calcium-activated channel, subfamily M, beta member 2	KCNMB2	2.4074	2.02e-105	1.16e-104	Transporters
153579	butyrophilin-like 9	BTNL9	2.4116	2.63e-110	1.67e-109	Miscellaneous
23768	fibronectin leucine rich transmembrane protein 2	FLRT2	2.4239	4.65e-115	3.23e-114	Miscellaneous
130399	activin A receptor, type IC	ACVR1C	2.4289	3.97e-80	1.45e-79	Receptors
22953	purinergic receptor P2X, ligand-gated ion channel, 2	P2RX2	2.44	3.65e-29	6.3e-29	Transporters
3360	5-hydroxytryptamine (serotonin) receptor 4, G protein-coupled	HTR4	2.4632	7.94e-51	1.88e-50	Receptors
10369	calcium channel, voltage-dependent, gamma subunit 2	CACNG2	2.4861	1.53e-45	3.34e-45	Transporters
4160	melanocortin 4 receptor	MC4R	2.5023	1.58e-54	3.93e-54	Receptors
2913	glutamate receptor, metabotropic 3	GRM3	2.5086	8.28e-106	4.81e-105	Receptors
10886	neuropeptide FF receptor 2	NPFFR2	2.5125	1.48e-42	3.08e-42	Receptors
27091	calcium channel, voltage-dependent, gamma subunit 5	CACNG5	2.5156	4.07e-51	9.68e-51	Transporters
151258	solute carrier family 38, member 11	SLC38A11	2.5173	7.59e-129	7.09e-128	Transporters
353189	solute carrier organic anion transporter family, member 4C1	SLCO4C1	2.5223	6.55e-57	1.68e-56	Transporters
5100	protocadherin 8	PCDH8	2.5253	4.73e-71	1.51e-70	Miscellaneous
55800	sodium channel, voltage-gated, type III, beta subunit	SCN3B	2.532	1.57e-72	5.15e-72	Transporters
9033	polycystic kidney disease 2-like 1	PKD2L1	2.5382	7.12e-58	1.85e-57	Transporters
6855	synaptophysin	SYP	2.5384	7.55e-98	3.77e-97	Miscellaneous
343172	olfactory receptor, family 2, subfamily T, member 8	OR2T8	2.5557	1.83e-77	6.44e-77	Receptors
79501	olfactory receptor, family 4, subfamily F, member 5	OR4F5	2.5778	2.68e-86	1.09e-85	Receptors
83873	G protein-coupled receptor 61	GPR61	2.5861	2.91e-84	1.14e-83	Receptors
2322	fms-related tyrosine kinase 3	FLT3	2.5937	2.4e-72	7.8e-72	Receptors
2911	glutamate receptor, metabotropic 1	GRM1	2.5945	3.84e-82	1.45e-81	Receptors
6511	solute carrier family 1 (high affinity aspartate/glutamate transporter), member 6	SLC1A6	2.5983	9.9e-56	2.5e-55	Transporters
9369	neurexin 3	NRXN3	2.5999	1.36e-91	6.04e-91	Receptors
2832	neuropeptides B/W receptor 2	NPBWR2	2.6016	3.18e-43	6.69e-43	Receptors
8913	calcium channel, voltage-dependent, T type, alpha 1G subunit	CACNA1G	2.6082	1.35e-92	6.08e-92	Transporters
1129	cholinergic receptor, muscarinic 2	CHRM2	2.6124	3.49e-67	1.05e-66	Receptors
4868	nephrosis 1, congenital, Finnish type (nephrin)	NPHS1	2.6186	1.85e-101	9.86e-101	Unclassified
6326	sodium channel, voltage-gated, type II, alpha subunit	SCN2A	2.6191	1.73e-109	1.08e-108	Transporters
2993	glycophorin A (MNS blood group)	GYPA	2.6278	1.32e-102	7.22e-102	Unclassified
491	ATPase, Ca++ transporting, plasma membrane 2	ATP2B2	2.6288	1.06e-112	7.02e-112	Transporters
2707	gap junction protein, beta 3, 31kDa	GJB3	2.6351	1.74e-81	6.5e-81	Miscellaneous
153	adrenergic, beta-1-, receptor	ADRB1	2.6368	5.65e-148	8.23e-147	Receptors
933	CD22 molecule	CD22	2.6474	4.33e-63	1.21e-62	Miscellaneous
26047	contactin associated protein-like 2	CNTNAP2	2.6562	4.89e-79	1.76e-78	Receptors
6751	somatostatin receptor 1	SSTR1	2.6704	6.4e-56	1.62e-55	Receptors
51458	Rh family, C glycoprotein	RHCG	2.6808	3.09e-163	6.58e-162	Transporters
155	adrenergic, beta-3-, receptor	ADRB3	2.6853	6.99e-66	2.04e-65	Receptors
10350	ATP-binding cassette, sub-family A (ABC1), member 9	ABCA9	2.6898	5.14e-171	1.32e-169	Transporters
6540	solute carrier family 6 (neurotransmitter transporter, GABA), member 13	SLC6A13	2.6947	2.46e-115	1.72e-114	Transporters
344758	G protein-coupled receptor 149	GPR149	2.6987	6.13e-57	1.57e-56	Unclassified
344561	G protein-coupled receptor 148	GPR148	2.7095	2.21e-79	7.99e-79	Receptors
83445	germ cell associated 1	GSG1	2.7186	1.96e-137	2.24e-136	Unclassified
341568	olfactory receptor, family 8, subfamily S, member 1	OR8S1	2.729	2.06e-97	1.02e-96	Receptors
5798	protein tyrosine phosphatase, receptor type, N	PTPRN	2.7336	2.38e-76	8.23e-76	Receptors
9152	solute carrier family 6 (neurotransmitter transporter, glycine), member 5	SLC6A5	2.7346	5.6e-56	1.42e-55	Transporters
23461	ATP-binding cassette, sub-family A (ABC1), member 5	ABCA5	2.7406	6.98e-151	1.1e-149	Transporters
8784	tumor necrosis factor receptor superfamily, member 18	TNFRSF18	2.7528	2.09e-103	1.15e-102	Receptors
5733	prostaglandin E receptor 3 (subtype EP3)	PTGER3	2.764	5.39e-64	1.53e-63	Receptors
55966	adherens junctions associated protein 1	AJAP1	2.7668	1.69e-111	1.09e-110	Unclassified
6539	solute carrier family 6 (neurotransmitter transporter, betaine/GABA), member 12	SLC6A12	2.7683	3.15e-148	4.61e-147	Transporters
3897	L1 cell adhesion molecule	L1CAM	2.7951	8.36e-67	2.49e-66	Miscellaneous
3358	5-hydroxytryptamine (serotonin) receptor 2C, G protein-coupled	HTR2C	2.8013	2.64e-54	6.55e-54	Receptors
221074	solute carrier family 39 (zinc transporter), member 12	SLC39A12	2.8078	1.07e-69	3.33e-69	Transporters
2742	glycine receptor, alpha 2	GLRA2	2.836	9.21e-75	3.1e-74	Transporters
55503	transient receptor potential cation channel, subfamily V, member 6	TRPV6	2.8425	3.01e-90	1.31e-89	Transporters
80144	Fraser syndrome 1	FRAS1	2.8592	3.45e-105	1.97e-104	Unclassified
83259	protocadherin 11 Y-linked	PCDH11Y	2.86	3.31e-20	5.02e-20	Miscellaneous
64405	cadherin 22, type 2	CDH22	2.8664	3.3e-90	1.43e-89	Miscellaneous
9389	solute carrier family 22, member 14	SLC22A14	2.867	2.1e-139	2.54e-138	Transporters
1142	cholinergic receptor, nicotinic, beta 3 (neuronal)	CHRNB3	2.8727	1.49e-77	5.24e-77	Transporters
9071	claudin 10	CLDN10	2.8846	1.03e-89	4.43e-89	Miscellaneous
9340	glucagon-like peptide 2 receptor	GLP2R	2.891	1.12e-69	3.49e-69	Receptors
54894	ring finger protein 43	RNF43	2.9383	1.81e-95	8.62e-95	Unclassified
57611	immunoglobulin superfamily containing leucine-rich repeat 2	ISLR2	2.9463	7.5e-93	3.4e-92	Miscellaneous
4988	opioid receptor, mu 1	OPRM1	2.9746	1.01e-75	3.45e-75	Receptors
1394	corticotropin releasing hormone receptor 1	CRHR1	2.9747	1.15e-124	9.81e-124	Receptors
1825	desmocollin 3	DSC3	2.9807	1.55e-52	3.77e-52	Miscellaneous
152	adrenergic, alpha-2C-, receptor	ADRA2C	3.0049	9.11e-147	1.29e-145	Receptors
4935	G protein-coupled receptor 143	GPR143	3.0206	7.26e-136	7.95e-135	Receptors
3356	5-hydroxytryptamine (serotonin) receptor 2A, G protein-coupled	HTR2A	3.0501	1.39e-84	5.45e-84	Receptors
9173	interleukin 1 receptor-like 1	IL1RL1	3.0556	9.73e-26	1.6e-25	Receptors
394263	mucin 21, cell surface associated	MUC21	3.0562	3.6e-59	9.52e-59	Unclassified
3062	hypocretin (orexin) receptor 2	HCRTR2	3.065	1.85e-92	8.34e-92	Receptors
90249	unc-5 homolog A (C. elegans)	UNC5A	3.0684	2.86e-111	1.84e-110	Receptors
57497	leucine rich repeat and fibronectin type III domain containing 2	LRFN2	3.0745	3.5e-109	2.16e-108	Miscellaneous
3350	5-hydroxytryptamine (serotonin) receptor 1A, G protein-coupled	HTR1A	3.0881	3.98e-50	9.33e-50	Receptors
57369	gap junction protein, delta 2, 36kDa	GJD2	3.1053	3.53e-70	1.11e-69	Miscellaneous
57282	solute carrier family 4, sodium bicarbonate transporter, member 10	SLC4A10	3.1075	1.11e-85	4.47e-85	Transporters
27199	oxoglutarate (alpha-ketoglutarate) receptor 1	OXGR1	3.1164	4.37e-109	2.7e-108	Receptors
4058	leukocyte receptor tyrosine kinase	LTK	3.1175	2.28e-108	1.39e-107	Receptors
51206	glycoprotein VI (platelet)	GP6	3.1349	4.12e-166	9.41e-165	Unclassified
4923	neurotensin receptor 1 (high affinity)	NTSR1	3.1392	7.93e-94	3.66e-93	Receptors
84634	KISS1 receptor	KISS1R	3.1427	7.03e-79	2.53e-78	Receptors
3351	5-hydroxytryptamine (serotonin) receptor 1B, G protein-coupled	HTR1B	3.1445	1.61e-94	7.51e-94	Receptors
7306	tyrosinase-related protein 1	TYRP1	3.1548	1.42e-74	4.79e-74	Unclassified
2565	gamma-aminobutyric acid (GABA) A receptor, gamma 1	GABRG1	3.157	2.92e-72	9.49e-72	Transporters
6545	solute carrier family 7 (orphan transporter), member 4	SLC7A4	3.1703	9.58e-100	4.97e-99	Transporters
145581	leucine rich repeat and fibronectin type III domain containing 5	LRFN5	3.175	8.79e-97	4.28e-96	Miscellaneous
5961	peripherin 2 (retinal degeneration, slow)	PRPH2	3.1825	1.98e-113	1.33e-112	Miscellaneous
59283	calcium channel, voltage-dependent, gamma subunit 8	CACNG8	3.2	9.9e-133	1.01e-131	Transporters
8718	tumor necrosis factor receptor superfamily, member 25	TNFRSF25	3.213	1.97e-164	4.36e-163	Receptors
284656	EPH receptor A10	EPHA10	3.2149	1.22e-118	9.09e-118	Receptors
6327	sodium channel, voltage-gated, type II, beta subunit	SCN2B	3.2179	1.27e-108	7.78e-108	Transporters
6324	sodium channel, voltage-gated, type I, beta subunit	SCN1B	3.2227	2.88e-154	4.94e-153	Transporters
3362	5-hydroxytryptamine (serotonin) receptor 6, G protein-coupled	HTR6	3.2251	2.86e-83	1.1e-82	Receptors
64106	neuropeptide FF receptor 1	NPFFR1	3.2268	1.26e-108	7.71e-108	Receptors
140679	solute carrier family 32 (GABA vesicular transporter), member 1	SLC32A1	3.2317	9.9e-64	2.8e-63	Transporters
1131	cholinergic receptor, muscarinic 3	CHRM3	3.2414	2.56e-90	1.11e-89	Receptors
1006	cadherin 8, type 2	CDH8	3.2456	2.45e-109	1.53e-108	Miscellaneous
1010	cadherin 12, type 2 (N-cadherin 2)	CDH12	3.2511	5.14e-87	2.11e-86	Miscellaneous
79589	ring finger protein 128, E3 ubiquitin protein ligase	RNF128	3.2692	1.1e-87	4.57e-87	Unclassified
5172	solute carrier family 26, member 4	SLC26A4	3.2721	1.22e-141	1.54e-140	Transporters
5801	protein tyrosine phosphatase, receptor type, R	PTPRR	3.3082	2.53e-105	1.45e-104	Receptors
9856	KIAA0319	KIAA0319	3.3196	7.13e-156	1.27e-154	Unclassified
2837	urotensin 2 receptor	UTS2R	3.3325	5.57e-90	2.4e-89	Receptors
57084	solute carrier family 17 (sodium-dependent inorganic phosphate cotransporter), member 6	SLC17A6	3.339	1.79e-61	4.89e-61	Transporters
8808	interleukin 1 receptor-like 2	IL1RL2	3.344	6.72e-125	5.77e-124	Receptors
2835	G protein-coupled receptor 12	GPR12	3.348	2.21e-107	1.32e-106	Receptors
388611	CD164 sialomucin-like 2	CD164L2	3.3707	9.4e-115	6.5e-114	Unclassified
2914	glutamate receptor, metabotropic 4	GRM4	3.4082	1.16e-109	7.27e-109	Receptors
1395	corticotropin releasing hormone receptor 2	CRHR2	3.4204	7.88e-97	3.85e-96	Receptors
4889	neuropeptide Y receptor Y5	NPY5R	3.4253	1.24e-103	6.87e-103	Receptors
55117	solute carrier family 6 (neutral amino acid transporter), member 15	SLC6A15	3.4478	5.2e-107	3.09e-106	Transporters
2563	gamma-aminobutyric acid (GABA) A receptor, delta	GABRD	3.4652	4.87e-118	3.58e-117	Transporters
3760	potassium inwardly-rectifying channel, subfamily J, member 3	KCNJ3	3.4656	2e-102	1.09e-101	Transporters
6754	somatostatin receptor 4	SSTR4	3.4945	6.36e-86	2.56e-85	Receptors
63982	anoctamin 3	ANO3	3.5786	4.6e-113	3.09e-112	Miscellaneous
7173	thyroid peroxidase	TPO	3.5941	1.56e-111	1.01e-110	Enzymes
4986	opioid receptor, kappa 1	OPRK1	3.6053	1.75e-95	8.31e-95	Receptors
2917	glutamate receptor, metabotropic 7	GRM7	3.6092	1.98e-124	1.68e-123	Receptors
3595	interleukin 12 receptor, beta 2	IL12RB2	3.6327	5.36e-135	5.74e-134	Receptors
4886	neuropeptide Y receptor Y1	NPY1R	3.6625	6.51e-147	9.24e-146	Receptors
7433	vasoactive intestinal peptide receptor 1	VIPR1	3.686	8.29e-184	2.72e-182	Receptors
285601	G protein-coupled receptor 150	GPR150	3.7044	5.45e-162	1.11e-160	Receptors
6543	solute carrier family 8 (sodium/calcium exchanger), member 2	SLC8A2	3.7128	5.35e-120	4.1e-119	Transporters
7087	intercellular adhesion molecule 5, telencephalin	ICAM5	3.7156	2.08e-122	1.69e-121	Unclassified
956	ectonucleoside triphosphate diphosphohydrolase 3	ENTPD3	3.7168	4.21e-118	3.1e-117	Enzymes
2831	neuropeptides B/W receptor 1	NPBWR1	3.7271	2.21e-90	9.64e-90	Receptors
2046	EPH receptor A8	EPHA8	3.7304	4.75e-140	5.81e-139	Receptors
10888	G protein-coupled receptor 83	GPR83	3.7343	9.18e-111	5.86e-110	Receptors
1812	dopamine receptor D1	DRD1	3.7613	2.59e-114	1.78e-113	Receptors
2912	glutamate receptor, metabotropic 2	GRM2	3.7849	2.6e-146	3.64e-145	Receptors
2555	gamma-aminobutyric acid (GABA) A receptor, alpha 2	GABRA2	3.7907	2.76e-131	2.73e-130	Transporters
1128	cholinergic receptor, muscarinic 1	CHRM1	3.8095	2.89e-108	1.76e-107	Receptors
3768	potassium inwardly-rectifying channel, subfamily J, member 12	KCNJ12	3.8204	8.69e-153	1.43e-151	Transporters
2566	gamma-aminobutyric acid (GABA) A receptor, gamma 2	GABRG2	3.8293	6.64e-76	2.27e-75	Transporters
29953	thyrotropin-releasing hormone degrading enzyme	TRHDE	3.85	2.44e-92	1.1e-91	Enzymes
158038	leucine rich repeat and Ig domain containing 2	LINGO2	3.8539	2.06e-101	1.1e-100	Miscellaneous
64137	ATP-binding cassette, sub-family G (WHITE), member 4	ABCG4	3.8671	9.84e-174	2.63e-172	Transporters
5746	parathyroid hormone 2 receptor	PTH2R	3.8779	3.32e-133	3.41e-132	Receptors
139065	SLIT and NTRK-like family, member 4	SLITRK4	3.9086	1.05e-133	1.09e-132	Miscellaneous
56666	pannexin 2	PANX2	3.9107	4.47e-199	1.96e-197	Unclassified
492	ATPase, Ca++ transporting, plasma membrane 3	ATP2B3	3.9145	2.43e-109	1.51e-108	Transporters
29990	paired immunoglobin-like type 2 receptor beta	PILRB	3.9177	1.62e-192	6.32e-191	Unclassified
10686	claudin 16	CLDN16	3.9433	1.36e-162	2.84e-161	Miscellaneous
93377	oligodendrocytic myelin paranodal and inner loop protein	OPALIN	3.9611	2.21e-72	7.21e-72	Unclassified
4185	ADAM metallopeptidase domain 11	ADAM11	3.9631	2.99e-181	9.23e-180	Enzymes
654429	leucine-rich repeats and transmembrane domains 2	LRTM2	4.0134	4.41e-99	2.26e-98	Miscellaneous
9293	G protein-coupled receptor 52	GPR52	4.0181	2.52e-109	1.57e-108	Receptors
343171	olfactory receptor, family 2, subfamily W, member 3	OR2W3	4.0434	3.5e-137	3.98e-136	Receptors
388394	reprimo-like	RPRML	4.103	2.59e-134	2.74e-133	Unclassified
94233	opsin 4	OPN4	4.1132	7.02e-132	7.04e-131	Receptors
339390	C-type lectin domain family 4, member G	CLEC4G	4.1287	4.42e-134	4.64e-133	Receptors
8581	lymphocyte antigen 6 complex, locus D	LY6D	4.1418	9.15e-117	6.57e-116	Unclassified
11255	histamine receptor H3	HRH3	4.1733	5.54e-109	3.42e-108	Receptors
121256	transmembrane protein 132D	TMEM132D	4.2029	5.42e-100	2.82e-99	Miscellaneous
8911	calcium channel, voltage-dependent, T type, alpha 1I subunit	CACNA1I	4.2351	6.97e-146	9.68e-145	Transporters
116369	solute carrier family 26, member 8	SLC26A8	4.2479	5.73e-205	2.69e-203	Transporters
1816	dopamine receptor D5	DRD5	4.2708	8.59e-111	5.48e-110	Receptors
3761	potassium inwardly-rectifying channel, subfamily J, member 4	KCNJ4	4.2904	2.33e-150	3.6e-149	Transporters
2051	EPH receptor B6	EPHB6	4.3024	8.92e-169	2.17e-167	Receptors
57468	solute carrier family 12 (potassium/chloride transporter), member 5	SLC12A5	4.3119	1.07e-138	1.28e-137	Transporters
23308	inducible T-cell co-stimulator ligand	ICOSLG	4.3533	6.26e-151	9.84e-150	Miscellaneous
2557	gamma-aminobutyric acid (GABA) A receptor, alpha 4	GABRA4	4.3576	1.34e-104	7.6e-104	Transporters
59350	relaxin/insulin-like family peptide receptor 1	RXFP1	4.3749	2.06e-112	1.36e-111	Receptors
222662	lipoma HMGIC fusion partner-like 5	LHFPL5	4.3796	1.14e-133	1.18e-132	Miscellaneous
160728	solute carrier family 5 (iodide transporter), member 8	SLC5A8	4.387	6.44e-184	2.12e-182	Transporters
2845	G protein-coupled receptor 22	GPR22	4.4072	5.83e-122	4.7e-121	Receptors
1007	cadherin 9, type 2 (T1-cadherin)	CDH9	4.4328	7.67e-123	6.26e-122	Miscellaneous
388662	solute carrier family 6, member 17	SLC6A17	4.4667	4.17e-135	4.48e-134	Transporters
2559	gamma-aminobutyric acid (GABA) A receptor, alpha 6	GABRA6	4.4894	4.89e-139	5.86e-138	Transporters
401994	olfactory receptor, family 14, subfamily I, member 1	OR14I1	4.4951	4.52e-98	2.27e-97	Receptors
2813	glycoprotein 2 (zymogen granule membrane)	GP2	4.5175	6.62e-48	1.5e-47	Unclassified
2830	G protein-coupled receptor 6	GPR6	4.5632	5.21e-110	3.28e-109	Receptors
132204	synaptoporin	SYNPR	4.5876	1.89e-122	1.53e-121	Miscellaneous
3359	5-hydroxytryptamine (serotonin) receptor 3A, ionotropic	HTR3A	4.5966	4.67e-146	6.51e-145	Transporters
9899	synaptic vesicle glycoprotein 2B	SV2B	4.6102	6.15e-115	4.26e-114	Transporters
2561	gamma-aminobutyric acid (GABA) A receptor, beta 2	GABRB2	4.6184	3.27e-119	2.47e-118	Transporters
9177	5-hydroxytryptamine (serotonin) receptor 3B, ionotropic	HTR3B	4.6435	1.94e-107	1.16e-106	Transporters
399947	chromosome 11 open reading frame 87	C11orf87	4.6772	1.41e-125	1.23e-124	Unclassified
3385	intercellular adhesion molecule 3	ICAM3	4.7187	8.14450000000004e-311	0	Receptors
1135	cholinergic receptor, nicotinic, alpha 2 (neuronal)	CHRNA2	4.7208	1.19e-117	8.66e-117	Transporters
6098	c-ros oncogene 1 , receptor tyrosine kinase	ROS1	4.7867	4e-93	1.82e-92	Receptors
2849	G protein-coupled receptor 26	GPR26	4.8036	5.59e-101	2.95e-100	Receptors
2554	gamma-aminobutyric acid (GABA) A receptor, alpha 1	GABRA1	4.872	2.93e-112	1.93e-111	Transporters
2558	gamma-aminobutyric acid (GABA) A receptor, alpha 5	GABRA5	4.8939	1.42e-127	1.29e-126	Transporters
145957	neuregulin 4	NRG4	4.9404	5.94e-298	7.67e-296	Unclassified
2844	G protein-coupled receptor 21	GPR21	4.9417	1.21e-185	4.15e-184	Receptors
57030	solute carrier family 17 (sodium-dependent inorganic phosphate cotransporter), member 7	SLC17A7	4.9785	2.55e-118	1.89e-117	Transporters
84539	melanin-concentrating hormone receptor 2	MCHR2	4.9818	1.59e-99	8.2e-99	Receptors
56301	solute carrier family 7 (neutral amino acid transporter light chain, asc system), member 10	SLC7A10	5.0296	5.29e-129	4.95e-128	Transporters
3354	5-hydroxytryptamine (serotonin) receptor 1E, G protein-coupled	HTR1E	5.0463	5.39e-144	7.19e-143	Receptors
50632	calcyon neuron-specific vesicular protein	CALY	5.0793	1.84e-150	2.86e-149	Unclassified
887	cholecystokinin B receptor	CCKBR	5.1141	1.55e-156	2.8e-155	Receptors
283652	solute carrier family 24, member 5	SLC24A5	5.2141	2.09e-242	1.47e-240	Transporters
3361	5-hydroxytryptamine (serotonin) receptor 5A, G protein-coupled	HTR5A	5.2305	4.31e-134	4.53e-133	Receptors
2902	glutamate receptor, ionotropic, N-methyl D-aspartate 1	GRIN1	5.2568	2.24e-135	2.42e-134	Transporters
135	adenosine A2a receptor	ADORA2A	5.3557	1.94e-288	2.26e-286	Receptors
8577	transmembrane protein with EGF-like and two follistatin-like domains 1	TMEFF1	5.498	7.21e-288	8.27e-286	Unclassified
10368	calcium channel, voltage-dependent, gamma subunit 3	CACNG3	5.7111	2.88e-142	3.69e-141	Transporters
3787	potassium voltage-gated channel, delayed-rectifier, subfamily S, member 1	KCNS1	5.7189	2.57e-144	3.46e-143	Transporters
114571	solute carrier family 22 (organic anion transporter), member 9	SLC22A9	5.7885	1.84e-222	1.08e-220	Transporters
6571	solute carrier family 18 (vesicular monoamine), member 2	SLC18A2	6.0117	0	0	Transporters
6534	solute carrier family 6 (neurotransmitter transporter, L-proline), member 7	SLC6A7	6.1944	1.02e-158	1.92e-157	Transporters
10804	gap junction protein, beta 6, 30kDa	GJB6	6.3093	1.46e-121	1.16e-120	Miscellaneous
1235	chemokine (C-C motif) receptor 6	CCR6	6.3667	0	1.23e-306	Receptors
23566	lysophosphatidic acid receptor 3	LPAR3	6.6792	3.28e-198	1.41e-196	Receptors
64881	protocadherin 20	PCDH20	9.8767	0	0	Miscellaneous
83999	kringle containing transmembrane protein 1	KREMEN1	12.324	0	0	Unclassified

## Sheet: Table S3
Table S3: GBM cell lines proteomics data from Bausch-Fluck et al. 2015
Protein ID	Gene	Glioblastoma ex-vivo	LN18	LN229	U251	U87
Q08AG5	ZNF844	20.5532	23.7263	18.6626	20.0245	20.8398
P29323	EPHB2	20.421	20.4517	21.2692	20.5732	18.7663
Q96NT5	SLC46A1	19.0007	21.1446	19.5819	20.3835	17.3287
P36269	GGT5	21.1745	18.9702	19.7836	21.81	21.081
Q9UH99	SUN2	18.8666	16.204	17.5071	19.838	18.3532
Q9C0H2	TTYH3	19.4262	19.3618	20.0369	19.4385	21.1835
P07339	CTSD	16.7854	16.3523	17.8965	19.6223	18.732
P20645	M6PR	20.192	18.3464	21.7628	17.7124	20.8351
P01033	TIMP1	18.1949	16.9896	18.3685	19.1068	18.2677
Q99808	SLC29A1	17.4718	20.0948	20.1598	18.626	20.3947
Q96J42	TXNDC15	17.6984	18.719	19.0636	19.5476	19.5274
P08962	CD63	22.5951	21.4844	21.612	14.815	19.2354
P00749	PLAU	20.6144	18.5797	19.6684	20.2353	17.8976
P54709	ATP1B3	18.2186	18.3379	16.8512	19.4184	17.3413
Q9UN70	PCDHGC3	20.9402	19.2771	18.8915	17.8464	17.9261
P04216	THY1	19.4621	19.2564	19.4404	19.2364	19.0062
P78324	SIRPA	18.4516	20.8023	20.9298	20.5213	19.9865
Q13449	LSAMP	20.7784	16.8813	18.293	17.869	18.3594
Q9ULF5	SLC39A10	17.3623	16.8755	24.4815	17.5835	22.6919
Q06481	APLP2	17.5005	18.1704	17.9369	21.0502	17.3039
Q13740	ALCAM	18.5334	19.1176	16.8319	18.0205	16.7153
Q92508	PIEZO1	17.9104	19.9046	18.9225	18.8237	16.9776
Q8IWK6	ADGRA3	18.6385	17.5232	19.525	17.2672	17.9
Q12797	ASPH	15.9766	16.2898	16.0672	20.8888	18.8654
Q96J84	KIRREL1	18.2655	20.2784	20.1912	18.6208	17.1564
P19022	CDH2	17.7177	19.5492	19.3877	18.2145	17.2426
P46977	STT3A	15.9166	16.0008	18.4124	15.2868	17.2
P33527	ABCC1	17.7943	18.1118	20.077	20.0848	15.4003
Q13433	SLC39A6	18.6433	17.8372	19.7769	17.041	17.8144
Q92542	NCSTN	18.7418	18.4529	18.0119	15.4271	16.6397
P42892	ECE1	19.446	18.5186	19.2743	17.584	17.2874
O96005	CLPTM1	15.6056	16.8852	16.6772	17.3972	18.6949
O43157	PLXNB1	17.9688	18.8591	18.8797	18.5589	18.1727
Q15758	SLC1A5	16.1211	18.2742	21.6713	18.9685	20.4987
P04156	PRNP	20.0888	20.5101	20.7886	21.073	19.8012
Q9Y6M7	SLC4A7	17.8824	18.5811	17.194	17.334	17.2752
Q9H0X4	FAM234A	18.9049	19.3528	18.3907	17.4997	19.3419
O14786	NRP1	19.8231	18.2148	16.1711	19.1641	19.1964
Q9UNN8	PROCR	19.5376	20.0041	16.1568	18.591	15.4231
Q9Y653	ADGRG1	17.398	16.2933	15.1463	18.7848	20.7032
Q12907	LMAN2	16.5335	17.2223	18.2038	18.9614	16.6995
O95136	S1PR2	19.636	18.1593	20.6432	17.764	19.7708
Q9Y639	NPTN	18.3546	18.4059	19.1501	17.148	16.6431
Q06418	TYRO3	17.9958	18.0986	18.7207	17.7506	17.0014
Q99650	OSMR	19.3831	17.8535	15.9558	17.5344	17.2152
Q8TCT7	SPPL2B	16.1753	18.0698	19.9829	18.3359	18.3151
Q5R3F8	ELFN2	17.9168	20.1986	19.3701	16.0664	16.6341
P41440	SLC19A1	16.8989	19.5173	16.8291	17.2119	17.8817
Q9UIW2	PLXNA1	19.4992	18.9819	18.1629	18.7438	17.3346
Q12913	PTPRJ	15.3143	17.1174	20.7929	16.1276	20.699
Q8N441	FGFRL1	17.3755	18.19	20.3638	18.5328	19.7504
Q5ZPR3	CD276	18.4205	17.5391	16.863	18.9362	17.8039
P10646	TFPI	17.6095	19.6273	20.2738	15.3407	17.2539
Q7KYR7	BTN2A1	17.2514	18.18	15.6918	18.578	16.941
O75976	CPD	17.3871	16.7905	17.3615	18.648	18.8456
P23470	PTPRG	18.9306	18.9753	18.3628	18.7496	16.159
Q9BXP2	SLC12A9	17.1871	19.4518	18.7584	18.062	18.2802
P15151	PVR	16.6526	18.3737	17.233	18.8372	18.6197
Q92859	NEO1	17.6309	18.8917	17.2381	17.4541	17.4576
Q8N8Z6	DCBLD1	17.3036	19.2466	16.2226	17.2137	15.6488
P29317	EPHA2	18.9249	18.0327	21.5814	18.4289	17.8346
O60568	PLOD3	15.8627	17.3731	18.1146	16.72	16.5404
Q16563	SYPL1	15.8412	19.2816	19.9669	15.2569	16.8047
Q8NFZ8	CADM4	16.8418	18.4024	20.4956	17.4895	17.3428
Q9P273	TENM3	17.6136	17.2119	17.5344	17.4875	16.6756
O14672	ADAM10	19.1224	16.1238	16.4288	16.8099	16.8834
Q7L0J3	SV2A	16.23	19.5284	17.9168	18.1274	17.8345
Q8N766	EMC1	18.1956	17.5349	18.555	21.0009	17.699
Q9ULI3	HEG1	18.6784	18.8071	15.8375	18.1069	15.7776
O95857	TSPAN13	18.7044	17.9268	18.3586	20.2595	16.96
P23229	ITGA6	16.3469	16.0039	13.8768	17.811	17.4094
P15529	CD46	14.8114	18.1849	16.0329	17.202	17.9774
Q14126	DSG2	18.4345	17.519	17.5724	18.1712	14.1199
P21589	NT5E	18.4768	19.5722	16.6914	17.6576	15.1603
P35555	FBN1	18.4996	14.0894	14.1612	18.5129	14.8576
Q8NBJ4	GOLM1	17.0315	17.0094	19.2765	17.6518	19.1196
O75882	ATRN	15.5485	14.7673	15.8666	19.0125	16.8945
P35052	GPC1	16.8386	19.0653	17.9045	19.5334	16.0986
P11166	SLC2A1	17.0888	20.7369	20.58	18.4551	16.9127
P35613	BSG	16.4049	17.3565	17.7126	17.8992	16.6147
Q92896	GLG1	17.0485	16.0659	20.162	17.552	18.6592
P11279	LAMP1	18.2675	15.8771	18.0111	17.2402	21.2593
O15031	PLXNB2	17.3372	17.548	17.606	17.3229	18.1699
Q969P0	IGSF8	15.3061	16.7091	16.8652	16.9314	17.397
P02786	TFRC	16.8454	17.7342	17.7506	18.4503	15.6752
Q6P4E1	CASC4	16.2554	17.0162	16.5252	18.7769	18.6003
Q15043	SLC39A14	19.1622	16.8055	13.7391	16.5458	17.3636
P08648	ITGA5	18.2028	16.2618	17.6786	17.3073	17.062
P19256	CD58	17.366	17.0282	17.3	18.8049	18.6663
Q9NQS3	NECTIN3	18.1151	18.3429	16.2948	17.3526	17.4215
P56199	ITGA1	18.4547	18.2284	18.1554	16.6617	13.3055
P08236	GUSB	14.9608	15.3904	16.9902	17.1001	15.7625
P17181	IFNAR1	17.7197	18.5801	16.0739	19.164	17.6043
Q7LGA3	HS2ST1	16.723	15.8077	19.2616	16.5332	16.9521
Q99523	SORT1	14.6862	18.4249	17.8939	16.7774	16.7663
P16070	CD44	15.5231	19.3077	19.9659	17.3238	16.4365
P30450	HLA-A	18.0779	17.3263	18.1025	16.7287	19.7386
P17301	ITGA2	16.7633	19.2443	17.8671	18.3368	14.7727
Q8IWA5	SLC44A2	18.8261	16.1635	23.066	19.0176	15.1819
Q08380	LGALS3BP	17.857	16.0385	16.9982	17.5544	17.7422
P25116	F2R	20.1656	19.4419	16.9857	18.0163	15.2794
Q9H6X2	ANTXR1	18.3572	19.6409	18.2296	18.2181	16.6104
Q9BZM5	ULBP2	17.0631	18.461	16.3241	16.924	16.5667
Q9UHX3	ADGRE2	17.3478	16.2904	17.5599	20.4691	16.1516
P54760	EPHB4	17.4638	18.0596	15.7461	16.1016	17.1646
P07942	LAMB1	15.0129	14.6963	16.6938	17.4903	11.7313
Q15904	ATP6AP1	18.403	16.5247	16.1354	16.2233	16.0565
P08473	MME	16.9145	18.7197	15.8749	18.8908	14.1231
Q9UIQ6	LNPEP	16.3556	17.6223	16.7145	14.4545	15.2566
Q92823	NRCAM	15.9618	17.8868	16.4609	19.0145	18.6587
Q7Z5N4	SDK1	18.7637	16.1884	12.5816	18.1296	18.989
P11047	LAMC1	16.5771	17.1494	17.1945	16.4186	18.486
P40189	IL6ST	17.8945	18.9477	18.4818	18.1774	17.1369
P11717	IGF2R	14.1247	13.3147	16.3341	16.9175	16.0709
Q07954	LRP1	15.8993	19.2531	14.4142	14.3042	12.7263
Q96AY3	FKBP10	14.1793	16.5605	17.7667	17.5482	17.0376
O43657	TSPAN6	16.2595	17.7109	17.3377	15.901	16.6994
P27701	CD82	14.8804	15.2376	18.1551	17.1696	18.8494
Q9H015	SLC22A4	19.1441	19.6078	17.0283	15.5098	17.513
Q13308	PTK7	18.732	18.6855	18.5352	18.8863	15.4361
Q9NV96	TMEM30A	16.138	17.3393	15.1453	16.1875	16.0202
P05026	ATP1B1	17.2779	20.1537	18.073	21.3708	15.1913
P04062	GBA	12.7866	15.0415	14.1621	17.4758	17.4746
Q8IV08	PLD3	14.0777	15.8507	19.1751	17.1846	18.5938
P19440	GGT1	15.3724	17.8025	18.174	19.1374	16.2644
Q6YHK3	CD109	18.2073	17.4958	17.181	19.2281	19.0539
P30530	AXL	16.399	17.7331	17.7807	18.8766	17.8638
Q96PD2	DCBLD2	17.8293	15.5597	15.41	17.8093	16.4171
Q9P2B2	PTGFRN	17.0116	17.2293	16.7405	17.8329	17.5528
P13473	LAMP2	16.228	16.8099	14.9525	16.5779	17.8875
Q9UHN6	CEMIP2	17.1563	17.2511	14.4843	18.5264	16.7039
P08195	SLC3A2	16.2241	19.1339	17.1315	18.0916	17.9367
O60503	ADCY9	18.7693	17.6782	17.8543	16.9778	16.5622
Q9BY67	CADM1	17.5103	15.0732	14.7351	18.7603	18.9394
P08069	IGF1R	16.1672	18.4319	14.9598	17.214	18.1377
P36941	LTBR	15.1559	17.2732	16.6238	19.0553	17.0705
P14625	HSP90B1	11.4631	15.0581	14.6443	19.5185	14.5072
O95297	MPZL1	16.2826	18.4345	16.6136	18.5817	16.4604
Q9UBV2	SEL1L	14.7302	15.1692	15.1712	15.7744	15.5953
Q5BKX6	SLC45A4	16.5222	16.6838	16.066	16.684	16.852
Q15223	NECTIN1	18.4571	16.8219	16.0365	14.2554	14.6242
Q15262	PTPRK	17.2762	18.2157	17.6655	16.8765	13.126
P43003	SLC1A3	20.1762	15.4286	16.8353	16.8298	16.3396
Q9HD45	TM9SF3	16.4684	16.1128	17.6023	18.2565	18.398
P06213	INSR	16.6499	16.6831	14.3492	18.2105	16.0726
P07996	THBS1	16.446	17.9924	18.4481	16.6549	16.6511
Q7Z3C6	ATG9A	15.9554	17.5183	16.0608	17.3487	15.4373
P10586	PTPRF	11.8016	18.3505	17.6096	15.3879	15.055
Q9NY35	CLDND1	16.6807	20.2887	17.1065	18.5675	16.0117
P48960	CD97	17.4236	18.7199	15.667	19.3333	17.4891
P43007	SLC1A4	16.849	17.5218	18.3484	17.1783	16.3099
Q9H6B4	CLMP	16.9931	16.721	16.9163	15.8976	15.6457
O75054	IGSF3	13.6877	14.0407	14.3958	17.6242	15.9084
Q4KMQ2	ANO6	16.747	16.5213	18.0386	15.8708	15.4641
P32004	L1CAM	14.8387	16.749	16.6708	16.4185	12.3837
Q86SJ2	AMIGO2	15.8132	17.4821	16.7522	17.3996	13.8445
P53794	SLC5A3	16.7589	15.5647	13.4768	17.0175	13.3555
Q9H813	PACC1	15.5514	17.6619	17.0751	17.9297	16.3951
Q08722	CD47	16.2699	16.8784	18.5497	16.0562	14.28
P06756	ITGAV	17.3974	17.7669	18.9193	17.484	17.5659
Q9UBG0	MRC2	17.6298	15.4017	15.6821	17.9471	13.5548
Q8IWT6	LRRC8A	18.0788	18.132	16.5034	17.0678	20.2012
P30825	SLC7A1	15.3302	14.832	16.7755	15.0435	16.9767
Q7Z6M3	MILR1	16.8692	16.0071	16.3186	14.677	15.0557
P13987	CD59	15.0198	15.5663	14.0794	14.8297	15.5112
P78504	JAG1	17.4064	17.206	15.9634	18.7006	15.7752
P26006	ITGA3	18.4856	20.3163	18.3253	19.5602	18.6076
P05556	ITGB1	17.2801	16.3649	15.5954	17.542	14.7491
P50895	BCAM	16.9955	17.9595	15.411	15.3544	18.6044
P49281	SLC11A2	16.1168	14.9968	15.2824	12.547	15.1859
O60637	TSPAN3	15.0135	16.2663	16.5278	16.3589	16.8516
Q9Y4D7	PLXND1	16.7395	17.9346	18.8006	17.2807	16.0929
Q9Y222	DMTF1	15.382	15.7767	15.1735	16.2945	14.5911
Q8TCJ2	STT3B	15.2701	13.5916	17.5008	17.2844	14.2623
Q9HDC9	APMAP	13.7662	14.416	13.6114	16.2671	15.2037
P10909	CLU	16.3818	14.8178	14.8683	15.5564	16.0827
Q29983	MICA	17.3182	17.7834	18.8398	18.4659	15.0374
Q5T3F8	TMEM63B	14.6278	16.8665	14.3402	15.3086	15.0206
Q9UGT4	SUSD2	15.2388	13.595	12.0168	12.7318	13.0213
P01892	HLA-A	18.0272	17.3575	19.6987	20.0363	21.2036
P13726	F3	17.3354	21.3272	20.1011	15.9992	13.627
Q14108	SCARB2	13.1618	13.3873	14.1949	15.3484	15.1785
Q3T906	GNPTAB	13.1031	15.3124	14.1392	13.2777	14.4609
Q9Y4L1	HYOU1	14.872	14.9766	14.7223	15.5569	13.6182
Q9NZQ7	CD274	18.6218	15.6158	12.4788	20.0916	14.0631
P00533	EGFR	11.7904	16.3325	12.4437	18.8204	14.5928

## Sheet: Table S4
Table S4: GBM tissue samples proteomics data from Polisetty et. al 2012
Gene Symbol	Protein Name	Peptides	Fold	Signal	TM	Sig/TM	CSF	Plasma
MRC2	mannose receptor, C type 2	2	7.61388		TM	TM	CSF	Plasma
FCGR3A	Fc fragment of IgG, low affinity IIIa, receptor (CD16a) isoform d precursor	2	4.95448		TM	TM		Plasma
HLA-DRA	major histocompatibility complex, class II, DR alpha precursor	6	4.42775		TM	TM		Plasma
CD44	CD44 antigen isoform 4 precursor	6	4.42272	Signal	TM	Signal	CSF	Plasma
CD74	CD74 antigen isoform b	3	4.37287		TM	TM
MSR1	macrophage scavenger receptor 1 isoform type 1	3	3.99333	Signal	TM	Signal
CD163	CD163 antigen isoform b	5	3.76143	Signal	TM	Signal	CSF	Plasma
EGFR	epidermal growth factor receptor isoform b precursor	3	3.28753	Signal	TM	Signal	CSF	Plasma
ITGB2	integrin, beta 2 precursor	9	3.14767		TM	TM
L1CAM	L1 cell adhesion molecule isoform 3 precursor	16	0.496976		TM	TM		Plasma
ATP2B2	plasma membrane calcium ATPase 2 isoform 2	20	0.490567		TM	TM
CNTNAP2	cell recognition molecule Caspr2 precursor	3	0.483663		TM	TM	CSF
PTPRZ1	protein tyrosine phosphatase, receptor-type, zeta1 precursor	8	0.478416		TM	TM	CSF
SYP	synaptophysin	3	0.431643		TM	TM
SLC8A2	solute carrier family 8 member 2 precursor	12	0.40171		TM	TM
SLC6A17	solute carrier family 6, member 17	5	0.400168		TM	TM
SLC17A6	solute carrier family 17 (sodium-dependent inorganic phosphate cotransporter), member 6	3	0.394418		TM	TM
SLC32A1	solute carrier family 32, member 1	3	0.367749		TM	TM
SV2B	synaptic vesicle protein 2B homolog	5	0.297923		TM	TM
SLC17A7	solute carrier family 17, member 7	6	0.254046		TM	TM

## Sheet: Table S5
Table S5: Protein-protein interaction network analysis of surfaceome
Id	Label	Degree	Betweenness	Surfaceome	Upregulated
P19320	VCAM1	426	422712	surface	upregulated
P00533	EGFR	391	415151	surface	upregulated
P36897	TGFBR1	66	61059.7	surface	upregulated
P16070	CD44	56	50242.1	surface	upregulated
P08138	NGFR	45	43802.7	surface	upregulated
P05107	ITGB2	45	37012.8	surface	upregulated
P43146	DCC	44	33117.2	surface	upregulated
P0CG48	UBC	42	179502	#N/A
Q12913	PTPRJ	38	26916.3	surface	upregulated
O95477	ABCA1	37	40401.3	surface	upregulated
P01903	HLA-DRA	36	25502.3	surface	upregulated
P51681	CCR5	31	39878.6	surface	upregulated
P07333	CSF1R	30	21999.7	surface	upregulated
O15455	TLR3	25	18880.3	surface	upregulated
Q15758	SLC1A5	21	22022	surface	upregulated
P50281	MMP14	19	21226.1	surface	upregulated
P25116	F2R	19	14671.3	surface	upregulated
P01589	IL2RA	19	13005.7	surface	upregulated
P01911	HLA-DRB1	19	6407.23	surface	upregulated
P06729	CD2	18	14182.4	surface	upregulated
Q08345	DDR1	15	12768.1	surface	upregulated
P14151	SELL	15	11457.6	surface	upregulated
P23471	PTPRZ1	15	10801.7	surface	upregulated
P12318	FCGR2A	14	7331.97	surface	upregulated
P32246	CCR1	14	6619	surface	upregulated
P04233	CD74	13	7911.83	surface	upregulated
P12314	FCGR1A	13	5633.66	surface	upregulated
P20138	CD33	13	5023.31	surface	upregulated
P25105	PTAFR	12	9145.93	surface	upregulated
Q15399	TLR1	12	8864.07	surface	upregulated
Q14242	SELPLG	12	7897.32	surface	upregulated
Q9NR97	TLR8	11	9114.68	surface	upregulated
P01909	HLA-DQA1	11	8679.34	surface	upregulated
P16473	TSHR	11	3914.16	surface	upregulated
P43405	SYK	10	20246.5	#N/A
Q9NPY3	CD93	10	7649.2	surface	upregulated
Q30154	HLA-DRB5	10	1256.53	surface	upregulated
P08047	SP1	9	12052.9	#N/A
P12319	FCER1A	9	6509.69	surface	upregulated
Q07011	TNFRSF9	9	5898.16	surface	upregulated
P07900	HSP90AA1	8	14328.4	#N/A
Q06124	PTPN11	8	9090.63	#N/A
O43657	TSPAN6	8	7679.29	surface	upregulated
P42081	CD86	8	5752.55	surface	upregulated
P05067	APP	8	5675.53	surface	#N/A
Q9HBE5	IL21R	8	4759.5	surface	upregulated
P28908	TNFRSF8	8	4406.45	surface	upregulated
P08238	HSP90AB1	7	9474.55	#N/A
P27986	PIK3R1	7	8281.64	#N/A
P11049	CD37	7	5323.47	surface	upregulated
P29350	PTPN6	7	4462.87	#N/A
P06239	LCK	7	3113.97	#N/A
P28068	HLA-DMB	7	3086.82	surface	upregulated
P55085	F2RL1	7	2961.77	surface	upregulated
P22681	CBL	7	2324.35	#N/A
P15509	CSF2RA	6	6585	surface	upregulated
P40763	STAT3	6	6249.53	#N/A
P04440	HLA-DPB1	6	4030.98	surface	upregulated
Q15762	CD226	6	2958.58	surface	upregulated
P09326	CD48	6	2908.77	surface	upregulated
P20036	HLA-DPA1	6	1096.17	surface	upregulated
Q9Y3P8	SIT1	6	774.64	surface	upregulated
P18146	EGR1	5	11485.6	#N/A
P63104	YWHAZ	5	9997.62	#N/A
Q12933	TRAF2	5	8126.3	#N/A
P62993	GRB2	5	7663.07	#N/A
Q15717	ELAVL1	5	6451.08	#N/A
P62258	YWHAE	5	5666.06	#N/A
P11142	HSPA8	5	5666.06	#N/A
P17676	CEBPB	5	5523.88	#N/A
P15311	EZR	5	5227.79	#N/A
Q03135	CAV1	5	5129.12	#N/A
O60674	JAK2	5	4484.18	#N/A
P29353	SHC1	5	4112.8	#N/A
P42224	STAT1	5	3439.24	#N/A
P07948	LYN	5	3173.84	#N/A
Q9Y4K3	TRAF6	5	2975.25	#N/A
Q9NYK1	TLR7	5	2010.13	surface	upregulated
Q6GTX8	LAIR1	5	1921.01	surface	upregulated
Q99836	MYD88	5	1306.06	#N/A
P06241	FYN	5	574.99	#N/A
O00459	PIK3R2	4	13092	#N/A
P51692	STAT5B	4	10709.2	#N/A
P10914	IRF1	4	10137.8	#N/A
P49023	PXN	4	8600.5	#N/A
P17947	SPI1	4	8251.79	#N/A
P01100	FOS	4	8146.7	#N/A
Q05397	PTK2	4	5549.7	#N/A
P17252	PRKCA	4	4546.38	#N/A
P49238	CX3CR1	4	3954	surface	upregulated
P12931	SRC	4	3652.97	#N/A
P26038	MSN	4	3589.02	#N/A
O60603	TLR2	4	3397.76	surface	#N/A
P08637	FCGR3A	4	2720.27	surface	upregulated
Q16581	C3AR1	4	2705.2	surface	upregulated
P21757	MSR1	4	2662.96	surface	upregulated
Q92905	COPS5	4	2164.23	#N/A
Q9UIB8	CD84	4	2075.24	surface	upregulated
P04626	ERBB2	4	1902.99	surface	#N/A
P41240	CSK	4	1575.96	#N/A
Q13618	CUL3	4	1567.94	#N/A
P41182	BCL6	4	1504.26	#N/A
P16220	CREB1	4	1457.84	#N/A
P21462	FPR1	4	1370.76	surface	upregulated
Q13424	SNTA1	4	1237.29	#N/A
P05026	ATP1B1	4	1206.25	surface	#N/A
Q13114	TRAF3	4	1178.02	#N/A
Q8TDQ0	HAVCR2	4	789.35	surface	upregulated
Q13077	TRAF1	4	508.65	#N/A
O00463	TRAF5	4	508.65	#N/A
P28067	HLA-DMA	4	78.65	surface	upregulated
O00287	RFXAP	4	17.42	#N/A
Q9Y258	CCL26	3	6132	#N/A
Q8WUM4	PDCD6IP	3	5324.12	#N/A
P08107	HSPA1A	3	5303.38	#N/A
P10809	HSPD1	3	5287.7	#N/A
P19838	NFKB1	3	4893.52	#N/A
P60709	ACTB	3	4551.56	#N/A
Q9Y5K6	CD2AP	3	4544.76	#N/A
P09382	LGALS1	3	4544.76	#N/A
O15357	INPPL1	3	3860.45	#N/A
P46940	IQGAP1	3	3504.49	#N/A
Q04206	RELA	3	3369.16	#N/A
P54219	SLC18A1	3	2637	surface	upregulated
P27701	CD82	3	2427.75	surface	#N/A
Q14289	PTK2B	3	2400.56	#N/A
P13612	ITGA4	3	2137.71	surface	#N/A
P05362	ICAM1	3	2096.44	surface	#N/A
O60669	SLC16A7	3	1749.62	surface	upregulated
P15498	VAV1	3	1726.01	#N/A
P55291	CDH15	3	1715.05	surface	upregulated
O00206	TLR4	3	1585.22	surface	#N/A
P23458	JAK1	3	1404.31	#N/A
Q9Y6H8	GJA3	3	1390.39	surface	upregulated
P42229	STAT5A	3	1390.34	#N/A
Q86UQ4	ABCA13	3	1356.26	surface	upregulated
P35222	CTNNB1	3	1237.31	#N/A
P42768	WAS	3	1237.31	#N/A
Q13501	SQSTM1	3	1142.58	#N/A
P08575	PTPRC	3	1017.86	surface	#N/A
P27348	YWHAQ	3	1017.58	#N/A
O00182	LGALS9	3	1015.43	#N/A
P04637	TP53	3	707.7	#N/A
O75955	FLOT1	3	625.12	#N/A
P27361	MAPK3	3	610.23	#N/A
O14543	SOCS3	3	568.57	#N/A
P46109	CRKL	3	529.03	#N/A
P49716	CEBPD	3	506.76	#N/A
Q09472	EP300	3	430.46	#N/A
P13611	VCAN	3	338.48	#N/A
P43403	ZAP70	3	263.05	#N/A
P02751	FN1	3	218.74	#N/A
P19174	PLCG1	3	201.39	#N/A
O43561	LAT	3	187.36	#N/A
P08571	CD14	3	158.69	surface	#N/A
P08581	MET	3	117.9	surface	#N/A
P25208	NFYB	3	101.37	#N/A
Q8TCQ1	2019-03-01	3	91.13	#N/A
Q9NS68	TNFRSF19	3	71.46	surface	upregulated
P14618	PKM	3	0.36	#N/A
P11836	MS4A1	3	0.36	surface	#N/A
P50995	ANXA11	3	0.36	#N/A
P46108	CRK	2	5925.31	#N/A
Q6P2Q9	PRPF8	2	5903.75	#N/A
Q16658	FSCN1	2	4336.48	#N/A
P18754	RCC1	2	4336.48	#N/A
P35579	MYH9	2	3332.73	#N/A
P28066	PSMA5	2	3332.73	#N/A
P03372	ESR1	2	3179.23	#N/A
P56945	BCAR1	2	3150.83	#N/A
O14964	HGS	2	2860.02	#N/A
Q9UBB4	ATXN10	2	2860.02	#N/A
O14745	SLC9A3R1	2	2636	#N/A
Q9Y3F4	STRAP	2	2518.98	#N/A
P63010	AP2B1	2	2518.98	#N/A
Q13546	RIPK1	2	2350.29	#N/A
Q9P0L0	VAPA	2	2257.52	#N/A
Q02790	FKBP4	2	2257.52	#N/A
P62979	RPS27A	2	2257.52	#N/A
P36542	ATP5C1	2	2257.52	#N/A
P42566	EPS15	2	2257.52	#N/A
P04406	GAPDH	2	2257.52	#N/A
P09496	CLTA	2	2257.52	#N/A
P04083	ANXA1	2	2257.52	#N/A
Q9Y490	TLN1	2	2257.52	#N/A
Q96CW1	AP2M1	2	2257.52	#N/A
Q9Y6I3	EPN1	2	2257.52	#N/A
O14818	PSMA7	2	2257.52	#N/A
P23528	CFL1	2	2257.52	#N/A
Q06830	PRDX1	2	2257.52	#N/A
Q14204	DYNC1H1	2	2257.52	#N/A
P26641	EEF1G	2	2257.52	#N/A
P04075	ALDOA	2	2257.52	#N/A
P31948	STIP1	2	2257.52	#N/A
P62316	SNRPD2	2	2257.52	#N/A
P04792	HSPB1	2	2257.52	#N/A
P0CG47	UBB	2	2257.52	#N/A
P04264	KRT1	2	2257.52	#N/A
P06576	ATP5B	2	2257.52	#N/A
P38646	HSPA9	2	2257.52	#N/A
Q14974	KPNB1	2	2257.52	#N/A
P31943	HNRNPH1	2	2257.52	#N/A
P52597	HNRNPF	2	2257.52	#N/A
P61978	HNRNPK	2	2257.52	#N/A
P06493	CDK1	2	2257.52	#N/A
P07437	TUBB	2	2257.52	#N/A
P55060	CSE1L	2	2257.52	#N/A
P68104	EEF1A1	2	2257.52	#N/A
O95782	AP2A1	2	2257.52	#N/A
P50402	EMD	2	2257.52	#N/A
Q13492	PICALM	2	2257.52	#N/A
P21333	FLNA	2	1917.37	#N/A
Q13349	ITGAD	2	1866.83	surface	#N/A
P63244	GNB2L1	2	1866.83	#N/A
P31946	YWHAB	2	1866.83	#N/A
Q99608	NDN	2	1795.45	#N/A
P16104	H2AFX	2	1795.45	#N/A
P29692	EEF1D	2	1463.34	#N/A
Q00610	CLTC	2	1414.18	#N/A
Q92841	DDX17	2	1374.14	#N/A
O00560	SDCBP	2	1374.14	#N/A
Q99962	SH3GL2	2	1368.68	#N/A
P02647	APOA1	2	1326.11	#N/A
P61073	CXCR4	2	1323.84	surface	#N/A
Q8TCT8	SPPL2A	2	1319	surface	upregulated
P47900	P2RY1	2	1319	surface	upregulated
Q99467	CD180	2	1319	surface	upregulated
P37288	AVPR1A	2	1319	surface	upregulated
Q92769	HDAC2	2	1319	#N/A
P17612	PRKACA	2	1319	#N/A
O95295	SNAPIN	2	1319	#N/A
Q9UBG0	MRC2	2	1319	surface	upregulated
P67870	CSNK2B	2	1319	#N/A
Q9UKG1	APPL1	2	1283.18	#N/A
P16333	NCK1	2	1283.18	#N/A
P42574	CASP3	2	1283.18	#N/A
P10275	AR	2	1283.18	#N/A
P25098	ADRBK1	2	1246.99	#N/A
P61160	ACTR2	2	1246.97	#N/A
P05556	ITGB1	2	1246.97	surface	#N/A
P14625	HSP90B1	2	1112.81	#N/A
Q15750	TAB1	2	1059.69	#N/A
P09493	TPM1	2	1059.69	#N/A
Q9UNH7	SNX6	2	1059.69	#N/A
Q9HAU4	SMURF2	2	1059.69	#N/A
P34932	HSPA4	2	1059.69	#N/A
Q13153	PAK1	2	1059.69	#N/A
Q16539	MAPK14	2	1059.69	#N/A
P09874	PARP1	2	1031.79	#N/A
P14174	MIF	2	926.3	#N/A
Q96B97	SH3KBP1	2	911.79	#N/A
P60953	CDC42	2	899.4	#N/A
P10147	CCL3	2	868	#N/A
P13501	CCL5	2	868	#N/A
O15467	CCL16	2	868	#N/A
P13236	CCL4	2	868	#N/A
P80098	CCL7	2	868	#N/A
P80075	CCL8	2	868	#N/A
P13500	CCL2	2	868	#N/A
P16619	CCL3L1	2	868	#N/A
O60880	SH2D1A	2	831.15	#N/A
Q13596	SNX1	2	807.63	#N/A
Q9BY43	CHMP4A	2	807.63	#N/A
P05198	EIF2S1	2	758.31	#N/A
P62753	RPS6	2	758.31	#N/A
P46777	RPL5	2	758.31	#N/A
P60228	EIF3E	2	758.31	#N/A
P62277	RPS13	2	758.31	#N/A
P62829	RPL23	2	758.31	#N/A
P26373	RPL13	2	758.31	#N/A
P63173	RPL38	2	758.31	#N/A
P62847	RPS24	2	758.31	#N/A
P46783	RPS10	2	758.31	#N/A
P62906	RPL10A	2	758.31	#N/A
P62701	RPS4X	2	758.31	#N/A
P02743	APCS	2	736.86	#N/A
P62158	CALM3	2	721.37	#N/A
O43639	NCK2	2	696.82	#N/A
P05771	PRKCB	2	641.65	#N/A
P55036	PSMD4	2	641.65	#N/A
Q12929	EPS8	2	641.65	#N/A
Q7Z6G8	ANKS1B	2	641.65	#N/A
Q9UQF2	MAPK8IP1	2	641.65	#N/A
P00519	ABL1	2	641.65	#N/A
Q99418	CYTH2	2	641.65	#N/A
Q14192	FHL2	2	641.65	#N/A
Q02556	IRF8	2	612.17	#N/A
P01042	KNG1	2	609.47	#N/A
Q96S59	RANBP9	2	580.8	#N/A
P01906	HLA-DQA2	2	565.84	surface	upregulated
P17096	HMGA1	2	466.62	#N/A
P55072	VCP	2	439.28	#N/A
O75369	FLNB	2	409.95	#N/A
Q14160	SCRIB	2	409.95	#N/A
Q07157	TJP1	2	382.14	#N/A
P17931	LGALS3	2	367.67	#N/A
O15524	SOCS1	2	365.43	#N/A
P07947	YES1	2	365.43	#N/A
Q07889	SOS1	2	365.43	#N/A
P02768	ALB	2	358.82	#N/A
P06756	ITGAV	2	339.41	surface	#N/A
P08631	HCK	2	329.99	#N/A
Q9H2A7	CXCL16	2	304.38	surface	upregulated
P41161	ETV5	2	296.64	#N/A
Q9H0E2	TOLLIP	2	296.35	#N/A
O43318	MAP3K7	2	296.35	#N/A
Q9NYJ8	TAB2	2	296.35	#N/A
P04629	NTRK1	2	290.56	surface	#N/A
P17861	XBP1	2	272.6	#N/A
Q14254	FLOT2	2	188.52	#N/A
P49407	ARRB1	2	187.16	#N/A
P11021	HSPA5	2	174.66	#N/A
Q13191	CBLB	2	167.19	#N/A
P02766	TTR	2	155.34	#N/A
Q9Y6K9	IKBKG	2	147.46	#N/A
P32519	ELF1	2	136.3	#N/A
Q8TDQ1	CD300LF	2	135.41	surface	upregulated
P01730	CD4	2	128.11	surface	#N/A
P46379	BAG6	2	126.82	#N/A
Q9H1C4	UNC93B1	2	112.03	surface	#N/A
P16581	SELE	2	106.41	surface	#N/A
Q02447	SP3	2	86.55	#N/A
P60568	IL2	2	68.38	#N/A
P42226	STAT6	2	49.68	#N/A
Q9BUZ4	TRAF4	2	30.88	#N/A
Q96LC7	SIGLEC10	2	24.87	surface	upregulated
Q5JY77	GPRASP1	2	22.07	#N/A
Q15363	TMED2	2	22.07	#N/A
P19474	TRIM21	2	21.04	#N/A
Q03113	GNA12	2	16.39	#N/A
Q5UIP0	RIF1	2	15	#N/A
Q5T3J3	LRIF1	2	15	#N/A
Q6P2N6	ADORA3	2	8.59	surface	upregulated
P22670	RFX1	2	5.56	#N/A
P48378	RFX2	2	5.56	#N/A
P48380	RFX3	2	5.56	#N/A
P33076	CIITA	2	0	#N/A
Q13480	GAB1	2	0	#N/A
P08962	CD63	2	0	surface	#N/A
P02686	MBP	2	0	#N/A
P08195	SLC3A2	2	0	surface	#N/A
Q15303	ERBB4	2	0	surface	#N/A
P09619	PDGFRB	2	0	surface	#N/A
Q07912	TNK2	2	0	#N/A
Q13873	BMPR2	2	0	#N/A
P52735	VAV2	2	0	#N/A
Q99075	HBEGF	2	0	surface	#N/A
O60716	CTNND1	2	0	#N/A
Q99933	BAG1	2	0	#N/A
Q13884	SNTB1	1	0	#N/A
Q92796	DLG3	1	0	#N/A
Q9NZN5	ARHGEF12	1	0	#N/A
O75970	MPDZ	1	0	#N/A
Q15700	DLG2	1	0	#N/A
Q9HAP6	LIN7B	1	0	#N/A
Q04724	TLE1	1	0	#N/A
Q13432	UNC119	1	0	#N/A
Q12873	CHD3	1	0	#N/A
P30408	TM4SF1	1	0	surface	#N/A
Q8TDN6	BRIX1	1	0	#N/A
O43147	SGSM2	1	0	#N/A
P51693	APLP1	1	0	surface	#N/A
O75352	MPDU1	1	0	#N/A
Q9Y2Q3	GSTK1	1	0	#N/A
P02741	CRP	1	0	#N/A
P19438	TNFRSF1A	1	0	surface	#N/A
Q13233	MAP3K1	1	0	#N/A
Q9GZM8	NDEL1	1	0	#N/A
O43612	HCRT	1	0	#N/A
Q9UQC2	GAB2	1	0	#N/A
P62942	FKBP1A	1	0	#N/A
Q6Y7W6	GIGYF2	1	0	#N/A
O95400	CD2BP2	1	0	#N/A
Q13425	SNTB2	1	0	#N/A
O43586	PSTPIP1	1	0	#N/A
Q92870	APBB2	1	0	#N/A
P51451	BLK	1	0	#N/A
Q6PKX4	DOK6	1	0	#N/A
P98077	SHC2	1	0	#N/A
Q13387	MAPK8IP2	1	0	#N/A
Q7Z7G1	CLNK	1	0	#N/A
P49757	NUMB	1	0	#N/A
Q13322	GRB10	1	0	#N/A
Q9BXR5	TLR10	1	0	surface	#N/A
Q9Y3B3	TMED7	1	0	surface	#N/A
Q8IUC6	TICAM1	1	0	#N/A
P51617	IRAK1	1	0	#N/A
O14920	IKBKB	1	0	#N/A
Q12931	TRAP1	1	0	#N/A
Q15311	RALBP1	1	0	#N/A
P43489	TNFRSF4	1	0	surface	#N/A
O43187	IRAK2	1	0	#N/A
P29597	TYK2	1	0	#N/A
Q8WXH5	SOCS4	1	0	#N/A
Q96RT1	ERBB2IP	1	0	#N/A
Q9BXN2	CLEC7A	1	0	surface	#N/A
P37023	ACVRL1	1	0	#N/A
Q8WUH2	TGFBRAP1	1	0	#N/A
Q15796	SMAD2	1	0	#N/A
P19256	CD58	1	0	surface	#N/A
P32971	TNFSF8	1	0	surface	upregulated
P14784	IL2RB	1	0	surface	#N/A
P41273	TNFSF9	1	0	#N/A
P21926	CD9	1	0	surface	#N/A
P01137	TGFB1	1	0	#N/A
Q7Z614	SNX20	1	0	#N/A
P13866	SLC5A1	1	0	surface	#N/A
P41567	EIF1	1	0	#N/A
P14316	IRF2	1	0	#N/A
Q01196	RUNX1	1	0	#N/A
Q33E94	RFX4	1	0	#N/A
P09086	POU2F2	1	0	#N/A
Q13133	NR1H3	1	0	#N/A
P55055	NR1H2	1	0	#N/A
Q15788	NCOA1	1	0	#N/A
Q06546	GABPA	1	0	#N/A
Q12772	SREBF2	1	0	#N/A
P23769	GATA2	1	0	#N/A
P23771	GATA3	1	0	#N/A
Q06945	SOX4	1	0	#N/A
P25490	YY1	1	0	#N/A
P19022	CDH2	1	0	surface	#N/A
O15530	PDPK1	1	0	#N/A
Q13224	GRIN2B	1	0	#N/A
Q9UM73	ALK	1	0	surface	#N/A
P19235	EPOR	1	0	surface	#N/A
P10912	GHR	1	0	surface	#N/A
P10721	KIT	1	0	surface	#N/A
P42680	TEC	1	0	#N/A
P06213	INSR	1	0	#N/A
Q9Y467	SALL2	1	0	#N/A
Q15849	SLC14A2	1	0	surface	upregulated
P15884	TCF4	1	0	#N/A
P41597	CCR2	1	0	surface	#N/A
P31785	IL2RG	1	0	surface	#N/A
Q02817	MUC2	1	0	#N/A
P16144	ITGB4	1	0	surface	#N/A
Q7Z3T8	ZFYVE16	1	0	#N/A
O95644	NFATC1	1	0	#N/A
P41159	LEP	1	0	#N/A
P57075	UBASH3A	1	0	#N/A
Q9UNE7	STUB1	1	0	#N/A
O95433	AHSA1	1	0	#N/A
O15105	SMAD7	1	0	#N/A
Q15843	NEDD8	1	0	#N/A
P40818	USP8	1	0	#N/A
P60174	TPI1	1	0	#N/A
P54368	OAZ1	1	0	#N/A
P62330	ARF6	1	0	#N/A
P31321	PRKAR1B	1	0	#N/A
P16152	CBR1	1	0	#N/A
P09936	UCHL1	1	0	#N/A
P51532	SMARCA4	1	0	#N/A
Q12824	SMARCB1	1	0	#N/A
P32927	CSF2RB	1	0	surface	#N/A
Q92583	CCL17	1	0	#N/A
O00626	CCL22	1	0	#N/A
P21741	MDK	1	0	#N/A
Q02297	NRG1	1	0	surface	#N/A
P02771	AFP	1	0	#N/A
P09429	HMGB1	1	0	#N/A
O00192	ARVCF	1	0	#N/A
Q92752	TNR	1	0	#N/A
P36575	ARR3	1	0	#N/A
Q8TAX7	MUC7	1	0	#N/A
P32121	ARRB2	1	0	#N/A
P24071	FCAR	1	0	surface	#N/A
Q08881	ITK	1	0	#N/A
Q13158	FADD	1	0	#N/A
Q96MG7	NDNL2	1	0	#N/A
Q9ULC0	EMCN	1	0	#N/A
P10909	CLU	1	0	#N/A
Q12860	CNTN1	1	0	surface	#N/A
Q9NWF9	RNF216	1	0	#N/A
Q9HCE7	SMURF1	1	0	#N/A
Q9NZ53	PODXL2	1	0	surface	#N/A
P19397	CD53	1	0	surface	#N/A
P56539	CAV3	1	0	#N/A
Q9BWF2	TRAIP	1	0	#N/A
Q86VB7	CD163	1	0	surface	upregulated
Q13485	SMAD4	1	0	#N/A
Q06278	AOX1	1	0	#N/A
P35240	NF2	1	0	#N/A
Q16851	UGP2	1	0	#N/A
Q15628	TRADD	1	0	#N/A
Q05707	COL14A1	1	0	#N/A
Q92793	CREBBP	1	0	#N/A
P28907	CD38	1	0	surface	#N/A
Q9HCC9	ZFYVE28	1	0	#N/A
O75928	PIAS2	1	0	#N/A
P04198	MYCN	1	0	#N/A
Q16659	MAPK6	1	0	#N/A
Q9NQC3	RTN4	1	0	#N/A
Q15714	TSC22D1	1	0	#N/A
Q9HCK4	ROBO2	1	0	#N/A
Q9UHD2	TBK1	1	0	#N/A
Q86WT6	TRIM69	1	0	#N/A
Q07890	SOS2	1	0	#N/A
P19784	CSNK2A2	1	0	#N/A
P61201	COPS2	1	0	#N/A
Q92890	UFD1L	1	0	#N/A
Q16637	SMN1	1	0	#N/A
P12757	SKIL	1	0	#N/A
O60496	DOK2	1	0	#N/A
P42858	HTT	1	0	#N/A
P21246	PTN	1	0	#N/A
P06127	CD5	1	0	surface	#N/A
Q13009	TIAM1	1	0	#N/A
Q01831	XPC	1	0	#N/A
P17936	IGFBP3	1	0	#N/A
O00592	PODXL	1	0	#N/A
Q9Y2X7	GIT1	1	0	#N/A
O95551	TDP2	1	0	#N/A
O75791	GRAP2	1	0	#N/A
Q96FE5	LINGO1	1	0	surface	#N/A
P84022	SMAD3	1	0	#N/A
Q9BZR6	RTN4R	1	0	surface	#N/A
O60507	TPST1	1	0	#N/A
P41743	PRKCI	1	0	#N/A
Q04759	PRKCQ	1	0	#N/A
P29590	PML	1	0	#N/A
P21980	TGM2	1	0	#N/A
P40939	HADHA	1	0	#N/A
Q9UPY5	SLC7A11	1	0	#N/A
P49755	TMED10	1	0	#N/A
Q7L273	KCTD9	1	0	#N/A
P53618	COPB1	1	0	#N/A
Q969Y2	GTPBP3	1	0	#N/A
P33681	CD80	1	0	surface	#N/A
P11177	PDHB	1	0	#N/A
Q9NX58	LYAR	1	0	#N/A
Q15034	HERC3	1	0	#N/A
P24278	ZBTB25	1	0	#N/A
Q86W54	SPATA24	1	0	#N/A
P50613	CDK7	1	0	#N/A
Q13094	LCP2	1	0	#N/A
P31269	HOXA9	1	0	#N/A
Q14790	CASP8	1	0	#N/A
O94768	STK17B	1	0	#N/A
P13796	LCP1	1	0	#N/A
Q7Z434	MAVS	1	0	#N/A
Q86WV6	TMEM173	1	0	#N/A
Q9BYX4	IFIH1	1	0	#N/A
O95786	DDX58	1	0	#N/A
Q13107	USP4	1	0	#N/A
Q8TBB1	LNX1	1	0	#N/A
P40337	VHL	1	0	#N/A
Q9UGK3	STAP2	1	0	#N/A
Q99972	MYOC	1	0	#N/A
Q86VP6	CAND1	1	0	#N/A
P46934	NEDD4	1	0	#N/A
Q16625	OCLN	1	0	#N/A
O75674	TOM1L1	1	0	#N/A
Q13976	PRKG1	1	0	#N/A
P60468	SEC61B	1	0	#N/A
O43541	SMAD6	1	0	#N/A
Q7Z418	KCNK18	1	0	#N/A
Q9NQ11	ATP13A2	1	0	surface	#N/A
Q9NWN3	FBXO34	1	0	#N/A
O95976	IGSF6	1	0	surface	upregulated
Q96T49	PPP1R16B	1	0	#N/A
O95747	OXSR1	1	0	#N/A
Q15052	ARHGEF6	1	0	#N/A
Q06190	PPP2R3A	1	0	#N/A
Q96EB6	SIRT1	1	0	#N/A
P62195	PSMC5	1	0	#N/A
Q96MP8	KCTD7	1	0	#N/A
Q86Y82	STX12	1	0	#N/A
Q99700	ATXN2	1	0	#N/A
Q8IXJ6	SIRT2	1	0	#N/A
O75604	USP2	1	0	#N/A
P46937	YAP1	1	0	#N/A
Q9H492	MAP1LC3A	1	0	#N/A
P15336	ATF2	1	0	#N/A
Q504Q3	PAN2	1	0	#N/A
Q6ZW49	PAXIP1	1	0	#N/A
P29279	CTGF	1	0	#N/A
Q02156	PRKCE	1	0	#N/A
O95466	FMNL1	1	0	#N/A
Q8NER1	TRPV1	1	0	#N/A
Q15051	IQCB1	1	0	#N/A
Q01082	SPTBN1	1	0	#N/A
Q9H8V3	ECT2	1	0	#N/A
Q96CP6	GRAMD1A	1	0	#N/A
O43852	CALU	1	0	#N/A
Q9NZS9	BFAR	1	0	#N/A
Q9H3S7	PTPN23	1	0	#N/A
Q9Y4L5	RNF115	1	0	#N/A
Q6V1X1	DPP8	1	0	#N/A
P05129	PRKCG	1	0	#N/A
Q99728	BARD1	1	0	#N/A
Q05655	PRKCD	1	0	#N/A
Q6ZMJ4	IL34	1	0	#N/A
Q01973	ROR1	1	0	surface	#N/A
P48736	PIK3CG	1	0	#N/A
O15085	ARHGEF11	1	0	#N/A
P41220	RGS2	1	0	#N/A
Q7L4P6	BEND5	1	0	#N/A
Q9HA65	TBC1D17	1	0	#N/A
Q96DI7	SNRNP40	1	0	#N/A
Q9HC98	NEK6	1	0	#N/A
P01889	HLA-B	1	0	surface	#N/A
O43765	SGTA	1	0	#N/A
Q9BV57	ADI1	1	0	#N/A
P01133	EGF	1	0	#N/A
Q9UJ41	RABGEF1	1	0	#N/A
P20333	TNFRSF1B	1	0	surface	#N/A
P16109	SELP	1	0	surface	#N/A
Q04941	PLP2	1	0	#N/A
P16410	CTLA4	1	0	#N/A
Q8IZE3	SCYL3	1	0	#N/A
P31947	SFN	1	0	#N/A
P06702	S100A9	1	0	#N/A
P01135	TGFA	1	0	#N/A
P68431	HIST1H3H	1	0	#N/A
O00750	PIK3C2B	1	0	#N/A
O00443	PIK3C2A	1	0	#N/A
P53675	CLTCL1	1	0	#N/A
P55735	SEC13	1	0	#N/A
P51636	CAV2	1	0	#N/A
Q9NYD6	HOXC10	1	0	#N/A
Q13740	ALCAM	1	0	surface	#N/A
P68366	TUBA4A	1	0	#N/A
P05023	ATP1A1	1	0	surface	#N/A
P21860	ERBB3	1	0	surface	#N/A
P13987	CD59	1	0	#N/A
Q07021	C1QBP	1	0	#N/A
O60831	PRAF2	1	0	#N/A
O75915	ARL6IP5	1	0	#N/A
O75368	SH3BGRL	1	0	#N/A
Q9Y3P9	RABGAP1	1	0	#N/A
Q9UBP9	GULP1	1	0	#N/A
P35241	RDX	1	0	#N/A
Q15438	CYTH1	1	0	#N/A
Q8IZV2	CMTM8	1	0	#N/A
P42684	ABL2	1	0	#N/A
Q92625	ANKS1A	1	0	#N/A
O96018	APBA3	1	0	#N/A
O00213	APBB1	1	0	#N/A
O95704	APBB3	1	0	#N/A
P51813	BMX	1	0	#N/A
Q9NSE2	CISH	1	0	#N/A
Q8IZW8	TNS4	1	0	#N/A
Q8TEW6	DOK4	1	0	#N/A
Q9P104	DOK5	1	0	#N/A
P07332	FES	1	0	#N/A
P35568	IRS1	1	0	#N/A
O14654	IRS4	1	0	#N/A
Q9UQQ2	SH2B3	1	0	#N/A
Q9Y6R0	NUMBL	1	0	#N/A
Q92569	PIK3R3	1	0	#N/A
P16885	PLCG2	1	0	#N/A
Q13882	PTK6	1	0	#N/A
P20936	RASA1	1	0	#N/A
Q8WYP3	RIN2	1	0	#N/A
Q9NRF2	SH2B1	1	0	#N/A
Q9NP31	SH2D2A	1	0	#N/A
Q92529	SHC3	1	0	#N/A
Q13239	SLA	1	0	#N/A
Q9UNS2	COPS3	1	0	#N/A
Q06187	BTK	1	0	#N/A
Q9NR96	TLR9	1	0	surface	#N/A
Q9H2U1	DHX36	1	0	#N/A
P30084	ECHS1	1	0	#N/A
Q8N5C8	TAB3	1	0	#N/A
P12830	CDH1	1	0	surface	#N/A
O15111	CHUK	1	0	#N/A
Q04864	REL	1	0	#N/A
O75159	SOCS5	1	0	#N/A
P18031	PTPN1	1	0	#N/A
P29466	CASP1	1	0	#N/A
P55210	CASP7	1	0	#N/A
P10600	TGFB3	1	0	#N/A
P37173	TGFBR2	1	0	surface	#N/A
P17813	ENG	1	0	surface	#N/A
P01854	IGHE	1	0	#N/A
O14828	SCAMP3	1	0	#N/A
Q99523	SORT1	1	0	surface	#N/A
P10747	CD28	1	0	surface	#N/A
P61812	TGFB2	1	0	#N/A
Q16663	CCL15	1	0	#N/A
P22362	CCL1	1	0	#N/A
Q16627	CCL14	1	0	#N/A
P78423	CX3CL1	1	0	surface	#N/A
P13598	ICAM2	1	0	surface	#N/A
P01138	NGF	1	0	#N/A
P00734	F2	1	0	#N/A
O00401	WASL	1	0	#N/A
P61158	ACTR3	1	0	#N/A
Q86VS8	HOOK3	1	0	#N/A
O75886	STAM2	1	0	#N/A
Q13671	RIN1	1	0	#N/A
P56270	MAZ	1	0	#N/A
P59665	DEFA1	1	0	#N/A
P15976	GATA1	1	0	#N/A
Q99616	CCL13	1	0	#N/A
P51671	CCL11	1	0	#N/A
P55773	CCL23	1	0	#N/A
Q14765	STAT4	1	0	#N/A
P14859	POU2F1	1	0	#N/A
P19793	RXRA	1	0	#N/A
P10828	THRB	1	0	#N/A
P48382	RFX5	1	0	#N/A
P20226	TBP	1	0	#N/A
P05412	JUN	1	0	#N/A
P14921	ETS1	1	0	#N/A
Q99569	PKP4	1	0	#N/A
P35590	TIE1	1	0	surface	#N/A
P46459	NSF	1	0	#N/A
Q02763	TEK	1	0	surface	#N/A
O14974	PPP1R12A	1	0	#N/A
P23467	PTPRB	1	0	surface	#N/A
P48357	LEPR	1	0	surface	#N/A
O60941	DTNB	1	0	#N/A
P46939	UTRN	1	0	#N/A
Q99519	NEU1	1	0	#N/A
Q9UJM3	ERRFI1	1	0	#N/A
P58753	TIRAP	1	0	#N/A
P98170	XIAP	1	0	#N/A
Q9Y336	SIGLEC9	1	0	surface	upregulated
P35228	NOS2	1	0	#N/A
P24385	CCND1	1	0	#N/A
P15941	MUC1	1	0	surface	#N/A
P17535	JUND	1	0	#N/A
P11215	ITGAM	1	0	surface	#N/A
Q13469	NFATC2	1	0	#N/A
P20702	ITGAX	1	0	surface	#N/A
Q03405	PLAUR	1	0	surface	#N/A
Q99704	DOK1	1	0	#N/A
P01024	C3	1	0	#N/A
Q14773	ICAM4	1	0	#N/A
P20701	ITGAL	1	0	surface	#N/A
Q9BX67	JAM3	1	0	surface	#N/A
Q5T0T0	2019-03-08	1	0	#N/A
P20336	RAB3A	1	0	#N/A
Q14050	COL9A3	1	0	#N/A
P49908	SEPP1	1	0	#N/A
P60520	GABARAPL2	1	0	#N/A
P16930	FAH	1	0	#N/A
Q92733	PRCC	1	0	#N/A
O94966	USP19	1	0	#N/A
Q02952	AKAP12	1	0	#N/A
Q9UBN7	HDAC6	1	0	#N/A
Q9NNZ3	DNAJC4	1	0	#N/A
Q8N111	CEND1	1	0	#N/A
Q02246	CNTN2	1	0	surface	#N/A
O94875	SORBS2	1	0	#N/A
Q05209	PTPN12	1	0	#N/A
P53041	PPP5C	1	0	#N/A
Q8IVM0	CCDC50	1	0	#N/A
Q14318	FKBP8	1	0	#N/A
Q9Y242	TCF19	1	0	#N/A
Q09666	AHNAK	1	0	#N/A
P40925	MDH1	1	0	#N/A
Q96JA1	LRIG1	1	0	surface	#N/A
P12004	PCNA	1	0	#N/A
P31939	ATIC	1	0	#N/A
Q14515	SPARCL1	1	0	#N/A
Q99784	OLFM1	1	0	#N/A
P06132	UROD	1	0	#N/A
Q15819	UBE2V2	1	0	#N/A
Q8TF42	UBASH3B	1	0	#N/A
O75095	MEGF6	1	0	#N/A
Q6UWJ1	TMCO3	1	0	surface	#N/A
P21291	CSRP1	1	0	#N/A
P52306	RAP1GDS1	1	0	#N/A
Q9Y3A3	MOB4	1	0	#N/A
P17174	GOT1	1	0	#N/A
O94992	HEXIM1	1	0	#N/A
P43243	MATR3	1	0	#N/A
O00170	AIP	1	0	#N/A
Q12852	MAP3K12	1	0	#N/A
Q13491	GPM6B	1	0	surface	#N/A
Q13561	DCTN2	1	0	#N/A
P41222	PTGDS	1	0	#N/A
Q9Y237	PIN4	1	0	#N/A
Q15005	SPCS2	1	0	#N/A
Q8N2Y8	RUSC2	1	0	#N/A
Q15120	PDK3	1	0	#N/A
Q9Y2H9	MAST1	1	0	#N/A
Q8TDB4	MGARP	1	0	#N/A
Q16186	ADRM1	1	0	#N/A
Q92835	INPP5D	1	0	#N/A
Q9Y4G6	TLN2	1	0	#N/A
O14796	SH2D1B	1	0	#N/A
P52294	KPNA1	1	0	#N/A
Q14789	GOLGB1	1	0	#N/A
Q9H8Y8	GORASP2	1	0	#N/A
P09958	FURIN	1	0	surface	#N/A
O43493	TGOLN2	1	0	#N/A
P46779	RPL28	1	0	#N/A
P62266	RPS23	1	0	#N/A
P53667	LIMK1	1	0	#N/A
P28482	MAPK1	1	0	#N/A
P49770	EIF2B2	1	0	#N/A
O95631	NTN1	1	0	#N/A
Q9UI10	EIF2B4	1	0	#N/A
Q8N5X7	EIF4E3	1	0	#N/A
P41091	EIF2S3	1	0	#N/A
Q14232	EIF2B1	1	0	#N/A
Q9GZV4	EIF5A2	1	0	#N/A
P20042	EIF2S2	1	0	#N/A
P05106	ITGB3	1	0	#N/A
P01375	TNF	1	0	#N/A
P49715	CEBPA	1	0	#N/A
O95231	VENTX	1	0	#N/A
P30273	FCER1G	1	0	#N/A
P12980	LYL1	1	0	#N/A
P31151	S100A7	1	0	#N/A
Q71U36	TUBA1A	1	0	#N/A
O95711	LY86	1	0	#N/A
P16035	TIMP2	1	0	#N/A
Q9BRG2	SH2D3A	1	0	#N/A
P30542	ADORA1	1	0	surface	#N/A
P07585	DCN	1	0	#N/A
Q14449	GRB14	1	0	#N/A
P63151	PPP2R2A	1	0	#N/A
O95498	VNN2	1	0	#N/A
O15162	PLSCR1	1	0	#N/A
P08922	ROS1	1	0	surface	#N/A
P06340	HLA-DOA	1	0	surface	upregulated
P15151	PVR	1	0	surface	#N/A
P22694	PRKACB	1	0	#N/A
Q92888	ARHGEF1	1	0	#N/A
Q6UWE0	LRSAM1	1	0	#N/A
Q9Y5V3	MAGED1	1	0	#N/A
P14923	JUP	1	0	#N/A
P49069	CAMLG	1	0	#N/A
Q92692	PVRL2	1	0	#N/A
P51884	LUM	1	0	#N/A
Q07954	LRP1	1	0	surface	#N/A
P30988	CALCR	1	0	surface	#N/A
O60749	SNX2	1	0	#N/A
O94972	TRIM37	1	0	#N/A
Q9ULV8	CBLC	1	0	#N/A
O15492	RGS16	1	0	#N/A
Q14344	GNA13	1	0	#N/A
O14944	EREG	1	0	surface	#N/A
O95219	SNX4	1	0	#N/A
Q9BQ16	SPOCK3	1	0	#N/A
P16591	FER	1	0	#N/A
Q8IUQ4	SIAH1	1	0	#N/A
P27824	CANX	1	0	#N/A
O43597	SPRY2	1	0	#N/A
P08069	IGF1R	1	0	#N/A
P21912	SDHB	1	0	#N/A
P13591	NCAM1	1	0	surface	#N/A
Q9HBE4	IL21	1	0	#N/A
P98082	DAB2	1	0	#N/A
P51452	DUSP3	1	0	#N/A
P09603	CSF1	1	0	surface	#N/A
Q9H213	MAGEH1	1	0	#N/A
P49354	FNTA	1	0	#N/A
P17302	GJA1	1	0	#N/A
P15514	AREG	1	0	#N/A
Q9NV92	NDFIP2	1	0	#N/A
Q93045	STMN2	1	0	#N/A
P20073	ANXA7	1	0	#N/A
P12755	SKI	1	0	#N/A
Q99677	LPAR4	1	0	surface	upregulated
P47813	EIF1AX	1	0	#N/A
P62736	ACTA2	1	0	#N/A
O95989	NUDT3	1	0	#N/A
Q9BY44	EIF2A	1	0	#N/A
P04844	RPN2	1	0	#N/A
P06730	EIF4E	1	0	#N/A
Q6GQQ9	OTUD7B	1	0	#N/A
P38936	CDKN1A	1	0	#N/A
Q9BT67	NDFIP1	1	0	#N/A
P04183	TK1	1	0	#N/A
P30304	CDC25A	1	0	#N/A
P18085	ARF4	1	0	#N/A
P09237	MMP7	1	0	#N/A
P34947	GRK5	1	0	#N/A
P08603	CFH	1	0	#N/A
P55211	CASP9	1	0	#N/A
O14939	PLD2	1	0	#N/A
Q00994	NGFRAP1	1	0	#N/A
Q9UKW4	VAV3	1	0	#N/A
P10644	PRKAR1A	1	0	#N/A
Q92918	MAP4K1	1	0	#N/A
O43255	SIAH2	1	0	#N/A
Q6NZI2	PTRF	1	0	#N/A
P51149	RAB7A	1	0	#N/A
Q9HB63	NTN4	1	0	#N/A
Q9BZW8	CD244	1	0	surface	#N/A
Q9H2X0	CHRD	1	0	#N/A
Q9UHD9	UBQLN2	1	0	#N/A
P13693	TPT1	1	0	#N/A
Q9UNN8	PROCR	1	0	surface	#N/A
Q96EY1	DNAJA3	1	0	#N/A
Q969Z0	TBRG4	1	0	#N/A
Q99959	PKP2	1	0	#N/A
O60884	DNAJA2	1	0	#N/A
Q9H5V8	CDCP1	1	0	surface	#N/A
P54760	EPHB4	1	0	surface	#N/A
Q04695	KRT17	1	0	#N/A
P02538	KRT6A	1	0	#N/A
P13647	KRT5	1	0	#N/A
O43592	XPOT	1	0	#N/A
P35221	CTNNA1	1	0	#N/A
P02533	KRT14	1	0	#N/A
Q00325	SLC25A3	1	0	#N/A
Q07065	CKAP4	1	0	#N/A
P31689	DNAJA1	1	0	#N/A
P16615	ATP2A2	1	0	#N/A
Q96AG4	LRRC59	1	0	#N/A
P10412	HIST1H1E	1	0	#N/A
P62807	HIST1H2BE	1	0	#N/A
P98172	EFNB1	1	0	surface	#N/A
Q14134	TRIM29	1	0	#N/A
P10599	TXN	1	0	#N/A
P05141	SLC25A5	1	0	#N/A
P29317	EPHA2	1	0	#N/A
Q9NR50	EIF2B3	1	0	#N/A
O75815	BCAR3	1	0	#N/A
P31949	S100A11	1	0	#N/A
P40855	PEX19	1	0	#N/A
P17600	SYN1	1	0	#N/A
Q9H299	SH3BGRL3	1	0	#N/A
P06396	GSN	1	0	#N/A
P60880	SNAP25	1	0	#N/A
Q96AD5	PNPLA2	1	0	#N/A
Q4KWH8	PLCH1	1	0	#N/A
A4FU49	SH3D21	1	0	#N/A
O15511	ARPC5	1	0	#N/A
Q13007	IL24	1	0	#N/A
Q9BZB8	CPEB1	1	0	#N/A
P56545	CTBP2	1	0	#N/A
Q5T7V8	GORAB	1	0	#N/A
Q9Y342	PLLP	1	0	#N/A
Q96IP4	FAM46A	1	0	#N/A
P55042	RRAD	1	0	#N/A
Q9H4G1	CST9L	1	0	#N/A
O60344	ECE2	1	0	#N/A
P78325	ADAM8	1	0	surface	#N/A
Q13464	ROCK1	1	0	#N/A
Q12891	HYAL2	1	0	surface	#N/A
P51784	USP11	1	0	#N/A
Q15025	TNIP1	1	0	#N/A
Q9Y4E8	USP15	1	0	#N/A
Q96L50	LRR1	1	0	#N/A
P04899	GNAI2	1	0	#N/A
Q9BUA3	C11orf84	1	0	#N/A
Q9NYS7	WSB2	1	0	#N/A
Q13145	BAMBI	1	0	surface	#N/A
P43357	MAGEA3	1	0	#N/A
P51610	HCFC1	1	0	#N/A
Q8N1I0	DOCK4	1	0	#N/A
P61619	SEC61A1	1	0	#N/A
Q96IZ5	RBM41	1	0	#N/A
P98175	RBM10	1	0	#N/A
P50148	GNAQ	1	0	#N/A
Q9Y4H2	IRS2	1	0	#N/A
Q3SX64	ODF3L2	1	0	#N/A
Q9BRS2	RIOK1	1	0	#N/A
Q8IY21	DDX60	1	0	#N/A
O14617	AP3D1	1	0	#N/A
P02511	CRYAB	1	0	#N/A
Q99417	MYCBP	1	0	#N/A
Q9NYF8	BCLAF1	1	0	#N/A
Q96J02	ITCH	1	0	#N/A
Q86YD5	LDLRAD3	1	0	surface	upregulated
O75330	HMMR	1	0	#N/A
P52564	MAP2K6	1	0	#N/A
Q9UGM1	CHRNA9	1	0	surface	upregulated
Q14714	SSPN	1	0	surface	upregulated
Q05513	PRKCZ	1	0	#N/A
P02652	APOA2	1	0	#N/A
P62263	RPS14	1	0	#N/A
P52907	CAPZA1	1	0	#N/A
Q9Y262	EIF3L	1	0	#N/A
Q8NDX9	LY6G5B	1	0	#N/A
Q96C36	PYCR2	1	0	#N/A
Q14157	UBAP2L	1	0	#N/A
Q15029	EFTUD2	1	0	#N/A
P35580	MYH10	1	0	#N/A
P24666	ACP1	1	0	#N/A
P05388	RPLP0	1	0	#N/A
Q99832	CCT7	1	0	#N/A
P49327	FASN	1	0	#N/A
Q04637	EIF4G1	1	0	#N/A
P52272	HNRNPM	1	0	#N/A
Q15366	PCBP2	1	0	#N/A
P61604	HSPE1	1	0	#N/A
Q96KG9	SCYL1	1	0	#N/A
P11586	MTHFD1	1	0	#N/A
Q13263	TRIM28	1	0	#N/A
P09651	HNRNPA1	1	0	#N/A
P08243	ASNS	1	0	#N/A
P05787	KRT8	1	0	#N/A
P62805	HIST1H4J	1	0	#N/A
P13645	KRT10	1	0	#N/A
P39210	MPV17	1	0	#N/A
P61247	RPS3A	1	0	#N/A
Q9NVA2	2019-09-11	1	0	#N/A
Q16698	DECR1	1	0	#N/A
P53680	AP2S1	1	0	#N/A
P26196	DDX6	1	0	#N/A
P30048	PRDX3	1	0	#N/A
P07741	APRT	1	0	#N/A
O00410	IPO5	1	0	#N/A
Q14566	MCM6	1	0	#N/A
P45880	VDAC2	1	0	#N/A
P08708	RPS17	1	0	#N/A
P35268	RPL22	1	0	#N/A
P17987	TCP1	1	0	#N/A
P14868	DARS	1	0	#N/A
P62937	PPIA	1	0	#N/A
P55769	NHP2L1	1	0	#N/A
P00387	CYB5R3	1	0	#N/A
Q15233	NONO	1	0	#N/A
P13010	XRCC5	1	0	#N/A
O43684	BUB3	1	0	#N/A
P20700	LMNB1	1	0	#N/A
Q15102	PAFAH1B3	1	0	#N/A
P07910	HNRNPC	1	0	#N/A
Q96I24	FUBP3	1	0	#N/A
P46782	RPS5	1	0	#N/A
P26599	PTBP1	1	0	#N/A
P62424	RPL7A	1	0	#N/A
Q8N1F7	NUP93	1	0	#N/A
Q9H444	CHMP4B	1	0	#N/A
P07384	CAPN1	1	0	#N/A
O95721	SNAP29	1	0	#N/A
Q12906	ILF3	1	0	#N/A
P07355	ANXA2	1	0	#N/A
Q9UKM9	RALY	1	0	#N/A
Q15785	TOMM34	1	0	#N/A
P49411	TUFM	1	0	#N/A
Q86YJ7	ANKRD13B	1	0	#N/A
P08670	VIM	1	0	#N/A
O00571	DDX3X	1	0	#N/A
P40227	CCT6A	1	0	#N/A
P01857	IGHG1	1	0	#N/A
Q13242	SRSF9	1	0	#N/A
P62913	RPL11	1	0	#N/A
P49721	PSMB2	1	0	#N/A
P49915	GMPS	1	0	#N/A
Q08J23	NSUN2	1	0	#N/A
Q9Y5A9	YTHDF2	1	0	#N/A
Q01085	TIAL1	1	0	#N/A
Q92621	NUP205	1	0	#N/A
P37837	TALDO1	1	0	#N/A
P35908	KRT2	1	0	#N/A
P56537	EIF6	1	0	#N/A
P23396	RPS3	1	0	#N/A
P49588	AARS	1	0	#N/A
P53990	IST1	1	0	#N/A
Q8WWM7	ATXN2L	1	0	#N/A
P60900	PSMA6	1	0	#N/A
P62873	GNB1	1	0	#N/A
P02100	HBE1	1	0	#N/A
P46778	RPL21	1	0	#N/A
O43143	DHX15	1	0	#N/A
P62241	RPS8	1	0	#N/A
Q8WXE9	STON2	1	0	#N/A
P22087	FBL	1	0	#N/A
P62633	CNBP	1	0	#N/A
O43390	HNRNPR	1	0	#N/A
P48729	CSNK1A1	1	0	#N/A
P69905	HBA2	1	0	#N/A
P12829	MYL4	1	0	#N/A
Q71DI3	HIST2H3A	1	0	#N/A
O00231	PSMD11	1	0	#N/A
P18206	VCL	1	0	#N/A
O94979	SEC31A	1	0	#N/A
Q9BSJ8	ESYT1	1	0	#N/A
Q8IZ07	ANKRD13A	1	0	#N/A
Q92945	KHSRP	1	0	#N/A
P02008	HBZ	1	0	#N/A
Q9Y3C6	PPIL1	1	0	#N/A
Q92900	UPF1	1	0	#N/A
P33993	MCM7	1	0	#N/A
Q15691	MAPRE1	1	0	#N/A
P31483	TIA1	1	0	#N/A
Q16891	IMMT	1	0	#N/A
P17844	DDX5	1	0	#N/A
P54136	RARS	1	0	#N/A
P27105	STOM	1	0	#N/A
P62826	RAN	1	0	#N/A
Q86V81	ALYREF	1	0	#N/A
P04818	TYMS	1	0	#N/A
Q9UNQ2	DIMT1	1	0	#N/A
Q9Y3D9	MRPS23	1	0	#N/A
O15371	EIF3D	1	0	#N/A
P06733	ENO1	1	0	#N/A
Q9NR56	MBNL1	1	0	#N/A
Q5T4S7	UBR4	1	0	#N/A
Q16543	CDC37	1	0	#N/A
O75489	NDUFS3	1	0	#N/A
P69892	HBG2	1	0	#N/A
P09211	GSTP1	1	0	#N/A
P25788	PSMA3	1	0	#N/A
Q13838	DDX39B	1	0	#N/A
Q15365	PCBP1	1	0	#N/A
P62269	RPS18	1	0	#N/A
Q9BXJ9	NAA15	1	0	#N/A
P25705	ATP5A1	1	0	#N/A
P07195	LDHB	1	0	#N/A
P54920	NAPA	1	0	#N/A
P42766	RPL35	1	0	#N/A
Q08211	DHX9	1	0	#N/A
P15880	RPS2	1	0	#N/A
O43707	ACTN4	1	0	#N/A
Q9H583	HEATR1	1	0	#N/A
P31942	HNRNPH3	1	0	#N/A
P40429	RPL13A	1	0	#N/A
P61225	RAP2B	1	0	#N/A
P50552	VASP	1	0	#N/A
P56385	ATP5I	1	0	#N/A
Q8WU79	SMAP2	1	0	#N/A
P16401	HIST1H1B	1	0	#N/A
P30041	PRDX6	1	0	#N/A
P51148	RAB5C	1	0	#N/A
P19338	NCL	1	0	#N/A
P16402	HIST1H1D	1	0	#N/A
P62136	PPP1CA	1	0	#N/A
Q9BV68	RNF126	1	0	#N/A
O75340	PDCD6	1	0	#N/A
Q13200	PSMD2	1	0	#N/A
P30626	SRI	1	0	#N/A
P08727	KRT19	1	0	#N/A
Q8N684	CPSF7	1	0	#N/A
P37802	TAGLN2	1	0	#N/A
P38159	RBMX	1	0	#N/A
P60866	RPS20	1	0	#N/A
Q13895	BYSL	1	0	#N/A
Q92499	DDX1	1	0	#N/A
Q8NE86	MCU	1	0	#N/A
P62851	RPS25	1	0	#N/A
P21796	VDAC1	1	0	#N/A
P11388	TOP2A	1	0	#N/A
P82673	MRPS35	1	0	#N/A
P20618	PSMB1	1	0	#N/A
P50990	CCT8	1	0	#N/A
P42356	PI4KA	1	0	#N/A
P46776	RPL27A	1	0	#N/A
Q15637	SF1	1	0	#N/A
Q86UX7	FERMT3	1	0	#N/A
O75146	HIP1R	1	0	#N/A
Q13347	EIF3I	1	0	#N/A
P41252	IARS	1	0	#N/A
P25398	RPS12	1	0	#N/A
P62081	RPS7	1	0	#N/A
P28347	TEAD1	1	0	#N/A
Q8N983	MRPL43	1	0	#N/A
Q53QZ3	ARHGAP15	1	0	#N/A
P05976	MYL1	1	0	#N/A
P13639	EEF2	1	0	#N/A
P56192	MARS	1	0	#N/A
Q96EP5	DAZAP1	1	0	#N/A
Q14315	FLNC	1	0	#N/A
Q9NSD9	FARSB	1	0	#N/A
Q15149	PLEC	1	0	#N/A
P78371	CCT2	1	0	#N/A
P33992	MCM5	1	0	#N/A
Q15942	ZYX	1	0	#N/A
P38919	EIF4A3	1	0	#N/A
Q13148	TARDBP	1	0	#N/A
Q14839	CHD4	1	0	#N/A
P28331	NDUFS1	1	0	#N/A
O43809	NUDT21	1	0	#N/A
Q9H3K6	BOLA2	1	0	#N/A
P43487	RANBP1	1	0	#N/A
P02786	TFRC	1	0	#N/A
P54577	YARS	1	0	#N/A
O60493	SNX3	1	0	#N/A
P22061	PCMT1	1	0	#N/A
O60610	DIAPH1	1	0	#N/A
P50991	CCT4	1	0	#N/A
Q9NR30	DDX21	1	0	#N/A
P36578	RPL4	1	0	#N/A
Q13283	G3BP1	1	0	#N/A
P26639	TARS	1	0	#N/A
P62888	RPL30	1	0	#N/A
Q00839	HNRNPU	1	0	#N/A
O75608	LYPLA1	1	0	#N/A
P06748	NPM1	1	0	#N/A
P61289	PSME3	1	0	#N/A
P26640	VARS	1	0	#N/A
P25205	MCM3	1	0	#N/A
Q9ULV4	CORO1C	1	0	#N/A
Q96AE4	FUBP1	1	0	#N/A
P16157	ANK1	1	0	#N/A
P49368	CCT3	1	0	#N/A
P35232	PHB	1	0	#N/A
Q9BUL8	PDCD10	1	0	#N/A
P16949	STMN1	1	0	#N/A
P18124	RPL7	1	0	#N/A
Q9Y295	DRG1	1	0	#N/A
P07814	EPRS	1	0	#N/A
P78527	PRKDC	1	0	#N/A
P62917	RPL8	1	0	#N/A
Q99798	ACO2	1	0	#N/A
Q00987	MDM2	1	0	#N/A
Q9BSD7	NTPCR	1	0	#N/A
P84077	ARF1	1	0	#N/A
Q9NP79	VTA1	1	0	#N/A
P39019	RPS19	1	0	#N/A
O43447	PPIH	1	0	#N/A
O00299	CLIC1	1	0	#N/A
P83731	RPL24	1	0	#N/A
P24534	EEF1B2	1	0	#N/A
Q99623	PHB2	1	0	#N/A
O14908	GIPC1	1	0	#N/A
P32969	RPL9	1	0	#N/A
P22626	HNRNPA2B1	1	0	#N/A
P11166	SLC2A1	1	0	#N/A
Q9BV40	VAMP8	1	0	#N/A
P28072	PSMB6	1	0	#N/A
Q8NI27	THOC2	1	0	#N/A
Q9P2J5	LARS	1	0	#N/A
P08621	SNRNP70	1	0	#N/A
P51991	HNRNPA3	1	0	#N/A
P48643	CCT5	1	0	#N/A
O43617	TRAPPC3	1	0	#N/A
Q92616	GCN1L1	1	0	#N/A
Q9HB71	CACYBP	1	0	#N/A
Q96PK6	RBM14	1	0	#N/A
P15153	RAC2	1	0	#N/A
P19623	SRM	1	0	#N/A
O95372	LYPLA2	1	0	#N/A
P30050	RPL12	1	0	#N/A
Q01844	EWSR1	1	0	#N/A
P40926	MDH2	1	0	#N/A
Q96P48	ARAP1	1	0	#N/A
P23246	SFPQ	1	0	#N/A
O95865	DDAH2	1	0	#N/A
Q9UPN3	MACF1	1	0	#N/A
O76003	GLRX3	1	0	#N/A
P47756	CAPZB	1	0	#N/A
P68371	TUBB4B	1	0	#N/A
P55196	MLLT4	1	0	#N/A
Q6ZTN6	ANKRD13D	1	0	#N/A
Q5SRE5	NUP188	1	0	#N/A
Q9HAV4	XPO5	1	0	#N/A
Q14103	HNRNPD	1	0	#N/A
P61254	RPL26	1	0	#N/A
P55884	EIF3B	1	0	#N/A
P33991	MCM4	1	0	#N/A
P08865	RPSA	1	0	#N/A
Q92688	ANP32B	1	0	#N/A
P62280	RPS11	1	0	#N/A
Q12905	ILF2	1	0	#N/A
P61088	UBE2N	1	0	#N/A
P04632	CAPNS1	1	0	#N/A
P61224	RAP1B	1	0	#N/A
Q9Y3U8	RPL36	1	0	#N/A
P32119	PRDX2	1	0	#N/A
Q96DH6	MSI2	1	0	#N/A
O60506	SYNCRIP	1	0	#N/A
P69891	HBG1	1	0	#N/A
P42677	RPS27	1	0	#N/A
P04843	RPN1	1	0	surface	#N/A
P09661	SNRPA1	1	0	#N/A
P11940	PABPC1	1	0	#N/A
Q9Y230	RUVBL2	1	0	#N/A
P62314	SNRPD1	1	0	#N/A
Q9NVI7	ATAD3A	1	0	#N/A
P05783	KRT18	1	0	#N/A
P00338	LDHA	1	0	#N/A
P67775	PPP2CA	1	0	#N/A
P24752	ACAT1	1	0	#N/A
O75643	SNRNP200	1	0	#N/A
Q14152	EIF3A	1	0	#N/A
P62857	RPS28	1	0	#N/A
P48047	ATP5O	1	0	#N/A
P30153	PPP2R1A	1	0	#N/A
P07737	PFN1	1	0	#N/A
P11387	TOP1	1	0	#N/A
P02545	LMNA	1	0	#N/A
P49736	MCM2	1	0	#N/A
P52292	KPNA2	1	0	#N/A
O43242	PSMD3	1	0	#N/A
Q13151	HNRNPA0	1	0	#N/A
P62244	RPS15A	1	0	#N/A
Q07020	RPL18	1	0	#N/A
P46781	RPS9	1	0	#N/A
P50570	DNM2	1	0	#N/A
P61081	UBE2M	1	0	#N/A
O14744	PRMT5	1	0	#N/A
P63220	RPS21	1	0	#N/A
P20671	HIST1H2AD	1	0	#N/A
O15269	SPTLC1	1	0	#N/A
P62249	RPS16	1	0	#N/A
P39023	RPL3	1	0	#N/A
P42704	LRPPRC	1	0	#N/A
Q9BZE4	GTPBP4	1	0	#N/A
P27635	RPL10	1	0	#N/A
P60660	MYL6	1	0	#N/A
P35527	KRT9	1	0	#N/A
P35637	FUS	1	0	#N/A
P52594	AGFG1	1	0	#N/A
O15145	ARPC3	1	0	#N/A
P63000	RAC1	1	0	#N/A
P60842	EIF4A1	1	0	#N/A
O14980	XPO1	1	0	#N/A
P53621	COPA	1	0	#N/A
P14866	HNRNPL	1	0	#N/A
Q08945	SSRP1	1	0	#N/A
P50914	RPL14	1	0	#N/A
P68363	TUBA1B	1	0	#N/A
Q7KZF4	SND1	1	0	#N/A
P06899	HIST1H2BJ	1	0	#N/A
P12956	XRCC6	1	0	#N/A
O60814	HIST1H2BK	1	0	#N/A
Q9NZI8	IGF2BP1	1	0	#N/A
P34130	NTF4	1	0	#N/A
P21802	FGFR2	1	0	surface	#N/A
P02461	COL3A1	1	0	#N/A
P22455	FGFR4	1	0	surface	#N/A
P35070	BTC	1	0	surface	#N/A
P18621	RPL17	1	0	#N/A
O14950	MYL12B	1	0	#N/A
Q8N752	CSNK1A1L	1	0	#N/A
P14210	HGF	1	0	#N/A
Q8N6U8	GPR161	1	0	surface	upregulated
O15264	MAPK13	1	0	#N/A
O00329	PIK3CD	1	0	#N/A
Q15046	KARS	1	0	#N/A
